# Supplementary material for: Identifying climate variables that interchange with volcanic eruptions as cooling forces during the Common Era’s ice ages
Source: Copernicus journal article supplement (doi:10.5194/egusphere-2024-1874), 2024-08-20
Supplement: Supplementary file 1 [file egusphere-2024-1874-supplement.zip]

## Sheet: ReadMe
Core calculation for: Identifying climate variables that interchange with volcanic eruptions as cooling forces during the Common Era’s ice ages
The next sheet calculates a high-resolution lead lag relations for NAO and SAOD
Lead-lag rlations for other paired series can be calculated by pasting series 1994 time steps long into Columns c and D.
For series with other lengths the calculations in rows 2037 to 2041 has to be adjusted.

## Sheet: LL(CPNAO,CPSAOD)
Fig 4c LL(CPNAO, CPSAOD)
Pos neg	0.366968
		Raw data		Normalized data																				Pasted
Year		CP(NaO,NAO)SD	CP(SAOD,SAOD)0.3SD	CP(NaO,NAO)SD	CP(SAOD,SAOD)0.3SD	Ang(x,y)	Pos.ang	NegAng	LL(x,y)9	Cumulative ang	Mod Cum	Full rotations	CYclePerio-1	Cperi	Cycle period	CPwhenLL>0.5	">0	Pearsons R(5)	PS(5)-Ru	Pos	PS(5)-Av	LL significant	Year	CPwhenLL>0.5
1		-0.405485	2.1078	-0.837253	2.14664
2		-0.399949	2.09351	-0.831716	2.13221	-0.00089508	0	1
3		-0.394426	2.07921	-0.826194	2.11778	-0.000899874	0	1
4		-0.388918	2.06491	-0.820685	2.10335	-0.000904909	0	1
5		-0.383425	2.05061	-0.815192	2.08892	-0.000910153	0	1
6		-0.377946	2.03631	-0.809713	2.07448	-0.000915717	0	1	-1	-0.000915717	0.000915717	1	0	0	6084.27	0	0
7		-0.372481	2.022	-0.804249	2.06004	-0.000922057	0	1	-1	-0.00183777	0.00183777	2	0	0	6042.85	0	0	-0.999999	0	0	0	1	7
8		-0.367032	2.0077	-0.798799	2.04561	-0.000929057	0	1	-1	-0.00276683	0.00276683	3	0	0	6000.07	0	0	-0.999999	0	0	0	1	8
9		-0.361598	1.9934	-0.793365	2.03117	-0.000936461	0	1	-1	-0.00370329	0.00370329	4	0	0	5956.3	0	0	-0.999999	0	0	0	1	9	22.2298
10		-0.356178	1.97909	-0.787945	2.01673	-0.000944057	0	1	-1	-0.00464735	0.00464735	5	0	0	5911.95	0	0	-0.999999	0	0	0	1	10	107.974
11		-0.350774	1.96478	-0.782541	2.00229	-0.000951667	0	1	-1	-0.00559902	0.00559902	6	0	0	5867.5	0	0	-0.999999	0	0	0	1	11
12		-0.345385	1.95048	-0.777153	1.98785	-0.000959162	0	1	-1	-0.00655818	0.00655818	7	0	0	5823.73	0	0	-0.999999	0	0	0	1	11
13		-0.340012	1.93617	-0.771779	1.97341	-0.000966438	0	1	-1	-0.00752462	0.00752462	8	0	0	5781.28	0	0	-0.999998	0	0	0	1	11
14		-0.334654	1.92186	-0.766422	1.95897	-0.000973428	0	1	-1	-0.00849804	0.00849804	9	0	0	5740.56	0	0	-0.999998	0	0	0	1	11
15		-0.329312	1.90755	-0.76108	1.94452	-0.000980088	0	1	-1	-0.00947813	0.00947813	10	0	0	5701.78	0	0	-0.999998	0	0	0	1	11
16		-0.323986	1.89324	-0.755753	1.93008	-0.00098641	0	1	-1	-0.0104645	0.0104645	11	0	0	5664.97	0	0	-0.999998	0	0	0	1	11
17		-0.318676	1.87893	-0.750443	1.91564	-0.000992403	0	1	-1	-0.0114569	0.0114569	12	0	0	5629.99	0	0	-0.999998	0	0	0	1	11
18		-0.313382	1.86462	-0.745149	1.90119	-0.000998105	0	1	-1	-0.012455	0.012455	13	0	0	5596.54	0	0	-0.999998	0	0	0	1	11
19		-0.308104	1.85031	-0.739872	1.88675	-0.00100358	0	1	-1	-0.0134586	0.0134586	14	0	0	5564.15	0	0	-0.999998	0	0	0	1	11
20		-0.302843	1.836	-0.73461	1.8723	-0.00100892	0	1	-1	-0.0144675	0.0144675	15	0	0	5532.15	0	0	-0.999998	0	0	0	1	11
21		-0.297598	1.82168	-0.729365	1.85786	-0.00101426	0	1	-1	-0.0154818	0.0154818	16	0	0	5499.67	0	0	-0.999998	0	0	0	1	11
22		-0.292369	1.80737	-0.724136	1.84341	-0.00101978	0	1	-1	-0.0165016	0.0165016	17	0	0	5465.8	0	0	-0.999998	0	0	0	1	11
23		-0.287157	1.79306	-0.718924	1.82897	-0.00102569	0	1	-1	-0.0175273	0.0175273	18	0	0	5430.34	0	0	-0.999998	0	0	0	1	11
24		-0.281962	1.77875	-0.713729	1.81452	-0.00103231	0	1	-1	-0.0185596	0.0185596	19	0	0	5393.27	0	0	-0.999998	0	0	0	1	11
25		-0.276784	1.76444	-0.708551	1.80008	-0.00104004	0	1	-1	-0.0195996	0.0195996	20	0	0	5354.68	0	0	-0.999998	0	0	0	1	11
26		-0.271622	1.75012	-0.70339	1.78563	-0.001049	0	1	-1	-0.0206486	0.0206486	21	0	0	5314.69	0	0	-0.999998	0	0	0	1	11
27		-0.266478	1.73581	-0.698245	1.77119	-0.00105814	0	1	-1	-0.0217068	0.0217068	22	0	0	5273.43	0	0	-0.999998	0	0	0	1	11
28		-0.261351	1.7215	-0.693119	1.75674	-0.00106716	0	1	-1	-0.0227739	0.0227739	23	0	0	5230.7	0	0	-0.999998	0	0	0	1	11
29		-0.256242	1.70719	-0.688009	1.7423	-0.00107607	0	1	-1	-0.02385	0.02385	24	0	0	5186.55	0	0	-0.999998	0	0	0	1	11
30		-0.25115	1.69288	-0.682918	1.72785	-0.00108486	0	1	-1	-0.0249349	0.0249349	25	0	0	5141.39	0	0	-0.999998	0	0	0	1	11
31		-0.246077	1.67857	-0.677844	1.71341	-0.00109374	0	1	-1	-0.0260286	0.0260286	26	0	0	5095.81	0	0	-0.999998	0	0	0	1	11
32		-0.241021	1.66426	-0.672788	1.69897	-0.00110351	0	1	-1	-0.0271321	0.0271321	27	0	0	5049.93	0	0	-0.999998	0	0	0	1	11
33		-0.235984	1.64996	-0.667751	1.68453	-0.00111407	0	1	-1	-0.0282462	0.0282462	28	0	0	5003.8	0	0	-0.999998	0	0	0	1	11
34		-0.230965	1.63565	-0.662732	1.67009	-0.00112513	0	1	-1	-0.0293713	0.0293713	29	0	0	4957.49	0	0	-0.999998	0	0	0	1	11
35		-0.225964	1.62134	-0.657732	1.65565	-0.00113641	0	1	-1	-0.0305077	0.0305077	30	0	0	4911.08	0	0	-0.999998	0	0	0	1	11
36		-0.220983	1.60704	-0.65275	1.64121	-0.00114771	0	1	-1	-0.0316554	0.0316554	31	0	0	4864.72	0	0	-0.999998	0	0	0	1	11
37		-0.216021	1.59274	-0.647788	1.62678	-0.00115889	0	1	-1	-0.0328143	0.0328143	32	0	0	4818.95	0	0	-0.999998	0	0	0	1	11
38		-0.211078	1.57844	-0.642845	1.61235	-0.00116985	0	1	-1	-0.0339842	0.0339842	33	0	0	4774.2	0	0	-0.999998	0	0	0	1	11
39		-0.206154	1.56414	-0.637922	1.59791	-0.00118063	0	1	-1	-0.0351648	0.0351648	34	0	0	4730.74	0	0	-0.999997	0	0	0	1	11
40		-0.201251	1.54985	-0.633018	1.58349	-0.00119123	0	1	-1	-0.036356	0.036356	35	0	0	4688.7	0	0	-0.999997	0	0	0	1	11
41		-0.196367	1.53555	-0.628134	1.56906	-0.00120161	0	1	-1	-0.0375576	0.0375576	36	0	0	4648.05	0	0	-0.999997	0	0	0	1	11
42		-0.191504	1.52126	-0.623271	1.55464	-0.00121179	0	1	-1	-0.0387694	0.0387694	37	0	0	4608.71	0	0	-0.999997	0	0	0	1	11
43		-0.186661	1.50697	-0.618428	1.54022	-0.00122179	0	1	-1	-0.0399912	0.0399912	38	0	0	4570.52	0	0	-0.999997	0	0	0	1	11
44		-0.181839	1.49269	-0.613606	1.5258	-0.00123164	0	1	-1	-0.0412228	0.0412228	39	0	0	4533.39	0	0	-0.999997	0	0	0	1	11
45		-0.177037	1.47841	-0.608804	1.51138	-0.00124141	0	1	-1	-0.0424643	0.0424643	40	0	0	4497.19	0	0	-0.999997	0	0	0	1	11
46		-0.172257	1.46413	-0.604024	1.49697	-0.00125117	0	1	-1	-0.0437154	0.0437154	41	0	0	4461.79	0	0	-0.999997	0	0	0	1	11
47		-0.167498	1.44986	-0.599265	1.48257	-0.00126091	0	1	-1	-0.0449763	0.0449763	42	0	0	4427.08	0	0	-0.999997	0	0	0	1	11
48		-0.16276	1.43559	-0.594527	1.46816	-0.00127066	0	1	-1	-0.046247	0.046247	43	0	0	4392.97	0	0	-0.999997	0	0	0	1	11
49		-0.158044	1.42132	-0.589811	1.45376	-0.00128044	0	1	-1	-0.0475274	0.0475274	44	0	0	4359.43	0	0	-0.999997	0	0	0	1	11
50		-0.15335	1.40706	-0.585117	1.43937	-0.00129025	0	1	-1	-0.0488177	0.0488177	45	0	0	4326.43	0	0	-0.999997	0	0	0	1	11
51		-0.148678	1.3928	-0.580445	1.42498	-0.00130007	0	1	-1	-0.0501178	0.0501178	46	0	0	4294.02	0	0	-0.999997	0	0	0	1	11
52		-0.144028	1.37855	-0.575796	1.4106	-0.00130988	0	1	-1	-0.0514276	0.0514276	47	0	0	4262.22	0	0	-0.999997	0	0	0	1	11
53		-0.139401	1.36431	-0.571169	1.39622	-0.00131964	0	1	-1	-0.0527473	0.0527473	48	0	0	4231.06	0	0	-0.999996	0	0	0	1	11
54		-0.134797	1.35007	-0.566564	1.38185	-0.0013293	0	1	-1	-0.0540766	0.0540766	49	0	0	4200.61	0	0	-0.999996	0	0	0	1	11
55		-0.130216	1.33583	-0.561983	1.36748	-0.00133882	0	1	-1	-0.0554154	0.0554154	50	0	0	4170.91	0	0	-0.999996	0	0	0	1	11
56		-0.125658	1.32161	-0.557425	1.35312	-0.00134821	0	1	-1	-0.0567636	0.0567636	51	0	0	4142.03	0	0	-0.999996	0	0	0	1	11
57		-0.121123	1.30739	-0.55289	1.33877	-0.00135746	0	1	-1	-0.0581211	0.0581211	52	0	0	4114.04	0	0	-0.999996	0	0	0	1	11
58		-0.116612	1.29317	-0.548379	1.32442	-0.00136653	0	1	-1	-0.0594876	0.0594876	53	0	0	4087	0	0	-0.999996	0	0	0	1	11
59		-0.112125	1.27896	-0.543892	1.31008	-0.00137541	0	1	-1	-0.060863	0.060863	54	0	0	4060.97	0	0	-0.999996	0	0	0	1	11
60		-0.107661	1.26476	-0.539429	1.29575	-0.00138405	0	1	-1	-0.0622471	0.0622471	55	0	0	4036.01	0	0	-0.999996	0	0	0	1	11
61		-0.103222	1.25057	-0.53499	1.28142	-0.00139241	0	1	-1	-0.0636395	0.0636395	56	0	0	4012.18	0	0	-0.999996	0	0	0	1	11
62		-0.0988078	1.23639	-0.530575	1.26711	-0.00140044	0	1	-1	-0.0650399	0.0650399	57	0	0	3989.57	0	0	-0.999996	0	0	0	1	11
63		-0.0944178	1.22222	-0.526185	1.2528	-0.0014081	0	1	-1	-0.066448	0.066448	58	0	0	3968.23	0	0	-0.999996	0	0	0	1	11
64		-0.0900525	1.20805	-0.52182	1.2385	-0.00141533	0	1	-1	-0.0678634	0.0678634	59	0	0	3948.22	0	0	-0.999996	0	0	0	1	11
65		-0.0857122	1.19389	-0.51748	1.22421	-0.00142212	0	1	-1	-0.0692855	0.0692855	60	0	0	3929.57	0	0	-0.999995	0	0	0	1	11
66		-0.081397	1.17975	-0.513164	1.20994	-0.00142843	0	1	-1	-0.0707139	0.0707139	61	0	0	3912.32	0	0	-0.999995	0	0	0	1	11
67		-0.077107	1.16561	-0.508874	1.19567	-0.00143425	0	1	-1	-0.0721482	0.0721482	62	0	0	3896.47	0	0	-0.999995	0	0	0	1	11
68		-0.0728425	1.15148	-0.50461	1.18141	-0.00143958	0	1	-1	-0.0735878	0.0735878	63	0	0	3881.99	0	0	-0.999995	0	0	0	1	11
69		-0.0686035	1.13737	-0.500371	1.16716	-0.00144443	0	1	-1	-0.0750322	0.0750322	64	0	0	3868.86	0	0	-0.999995	0	0	0	1	11
70		-0.0643902	1.12326	-0.496158	1.15292	-0.00144879	0	1	-1	-0.076481	0.076481	65	0	0	3857	0	0	-0.999995	0	0	0	1	11
71		-0.0602028	1.10917	-0.49197	1.1387	-0.0014527	0	1	-1	-0.0779337	0.0779337	66	0	0	3846.36	0	0	-0.999995	0	0	0	1	11
72		-0.0560412	1.09508	-0.487809	1.12449	-0.00145618	0	1	-1	-0.0793898	0.0793898	67	0	0	3836.82	0	0	-0.999995	0	0	0	1	11
73		-0.0519057	1.08101	-0.483673	1.11028	-0.00145927	0	1	-1	-0.0808491	0.0808491	68	0	0	3828.27	0	0	-0.999995	0	0	0	1	11
74		-0.0477964	1.06696	-0.479564	1.0961	-0.00146202	0	1	-1	-0.0823111	0.0823111	69	0	0	3820.58	0	0	-0.999995	0	0	0	1	11
75		-0.0437132	1.05291	-0.475481	1.08192	-0.00146448	0	1	-1	-0.0837756	0.0837756	70	0	0	3813.61	0	0	-0.999995	0	0	0	1	11
76		-0.0396564	1.03888	-0.471424	1.06776	-0.00146673	0	1	-1	-0.0852423	0.0852423	71	0	0	3807.18	0	0	-0.999995	0	0	0	1	11
77		-0.035626	1.02486	-0.467393	1.05361	-0.00146882	0	1	-1	-0.0867112	0.0867112	72	0	0	3801.16	0	0	-0.999995	0	0	0	1	11
78		-0.0316221	1.01086	-0.463389	1.03948	-0.00147084	0	1	-1	-0.088182	0.088182	73	0	0	3795.36	0	0	-0.999995	0	0	0	1	11
79		-0.0276447	0.996872	-0.459412	1.02536	-0.00147285	0	1	-1	-0.0896549	0.0896549	74	0	0	3789.67	0	0	-0.999994	0	0	0	1	11
80		-0.023694	0.982899	-0.455461	1.01125	-0.00147492	0	1	-1	-0.0911298	0.0911298	75	0	0	3783.96	0	0	-0.999994	0	0	0	1	11
81		-0.01977	0.96894	-0.451537	0.997166	-0.00147711	0	1	-1	-0.0926069	0.0926069	76	0	0	3778.15	0	0	-0.999994	0	0	0	1	11
82		-0.0158728	0.954997	-0.44764	0.983093	-0.00147943	0	1	-1	-0.0940863	0.0940863	77	0	0	3772.22	0	0	-0.999994	0	0	0	1	11
83		-0.0120024	0.94107	-0.44377	0.969036	-0.00148191	0	1	-1	-0.0955682	0.0955682	78	0	0	3766.16	0	0	-0.999994	0	0	0	1	11
84		-0.00815904	0.92716	-0.439926	0.954996	-0.00148449	0	1	-1	-0.0970527	0.0970527	79	0	0	3760.05	0	0	-0.999994	0	0	0	1	11
85		-0.00434266	0.913266	-0.43611	0.940973	-0.00148713	0	1	-1	-0.0985398	0.0985398	80	0	0	3753.97	0	0	-0.999994	0	0	0	1	11
86		-0.000553377	0.899389	-0.432321	0.926967	-0.00148975	0	1	-1	-0.10003	0.10003	81	0	0	3748.07	0	0	-0.999994	0	0	0	1	11
87		0.00320873	0.885531	-0.428559	0.912979	-0.00149225	0	1	-1	-0.101522	0.101522	82	0	0	3742.49	0	0	-0.999994	0	0	0	1	11
88		0.00694358	0.87169	-0.424824	0.899009	-0.00149454	0	1	-1	-0.103016	0.103016	83	0	0	3737.38	0	0	-0.999994	0	0	0	1	11
89		0.0106511	0.857868	-0.421116	0.885058	-0.00149654	0	1	-1	-0.104513	0.104513	84	0	0	3732.89	0	0	-0.999994	0	0	0	1	11
90		0.0143313	0.844065	-0.417436	0.871126	-0.00149819	0	1	-1	-0.106011	0.106011	85	0	0	3729.16	0	0	-0.999994	0	0	0	1	11
91		0.017984	0.83028	-0.413783	0.857214	-0.00149944	0	1	-1	-0.107511	0.107511	86	0	0	3726.3	0	0	-0.999994	0	0	0	1	11
92		0.0216093	0.816516	-0.410158	0.843321	-0.00150026	0	1	-1	-0.109011	0.109011	87	0	0	3724.37	0	0	-0.999993	0	0	0	1	11
93		0.025207	0.802772	-0.40656	0.829449	-0.00150065	0	1	-1	-0.110511	0.110511	88	0	0	3723.41	0	0	-0.999993	0	0	0	1	11
94		0.0287772	0.789048	-0.40299	0.815597	-0.00150059	0	1	-1	-0.112012	0.112012	89	0	0	3723.4	0	0	-0.999993	0	0	0	1	11
95		0.0323198	0.775345	-0.399447	0.801767	-0.0015001	0	1	-1	-0.113512	0.113512	90	0	0	3724.21	0	0	-0.999993	0	0	0	1	11
96		0.0358349	0.761664	-0.395932	0.787958	-0.00149922	0	1	-1	-0.115011	0.115011	91	0	0	3725.67	0	0	-0.999993	0	0	0	1	11
97		0.0393223	0.748004	-0.392445	0.774171	-0.00149801	0	1	-1	-0.116509	0.116509	92	0	0	3727.64	0	0	-0.999993	0	0	0	1	11
98		0.0427822	0.734367	-0.388985	0.760406	-0.0014966	0	1	-1	-0.118006	0.118006	93	0	0	3730.01	0	0	-0.999993	0	0	0	1	11
99		0.0462144	0.720752	-0.385553	0.746664	-0.00149524	0	1	-1	-0.119501	0.119501	94	0	0	3732.69	0	0	-0.999993	0	0	0	1	11
100		0.0496191	0.70716	-0.382148	0.732946	-0.00149417	0	1	-1	-0.120995	0.120995	95	0	0	3735.51	0	0	-0.999993	0	0	0	1	11
101		0.0529962	0.693592	-0.378771	0.719251	-0.00149314	0	1	-1	-0.122489	0.122489	96	0	0	3738.2	0	0	-0.999993	0	0	0	1	11
102		0.0563457	0.680047	-0.375422	0.70558	-0.00149206	0	1	-1	-0.123981	0.123981	97	0	0	3740.47	0	0	-0.999993	0	0	0	1	11
103		0.0596676	0.666527	-0.3721	0.691934	-0.00149094	0	1	-1	-0.125472	0.125472	98	0	0	3742.12	0	0	-0.999993	0	0	0	1	11
104		0.0629619	0.653031	-0.368805	0.678312	-0.00148992	0	1	-1	-0.126961	0.126961	99	0	0	3743.01	0	0	-0.999993	0	0	0	1	11
105		0.0662286	0.639561	-0.365539	0.664717	-0.00148957	0	1	-1	-0.128451	0.128451	100	0	0	3743.04	0	0	-0.999993	0	0	0	1	11
106		0.0694678	0.626116	-0.3623	0.651146	-0.00148985	0	1	-1	-0.129941	0.129941	101	0	0	3742	0	0	-0.999992	0	0	0	1	11
107		0.0726794	0.612697	-0.359088	0.637603	-0.00149067	0	1	-1	-0.131432	0.131432	102	0	0	3739.81	0	0	-0.999992	0	0	0	1	11
108		0.0758634	0.599305	-0.355904	0.624085	-0.00149203	0	1	-1	-0.132924	0.132924	103	0	0	3736.45	0	0	-0.999992	0	0	0	1	11
109		0.0790198	0.585939	-0.352748	0.610595	-0.00149407	0	1	-1	-0.134418	0.134418	104	0	0	3731.94	0	0	-0.999992	0	0	0	1	11
110		0.0821485	0.572601	-0.349619	0.597133	-0.00149688	0	1	-1	-0.135915	0.135915	105	0	0	3726.47	0	0	-0.999992	0	0	0	1	11
111		0.0852496	0.559291	-0.346518	0.583698	-0.00149991	0	1	-1	-0.137414	0.137414	106	0	0	3720.25	0	0	-0.999992	0	0	0	1	11
112		0.0883229	0.546008	-0.343444	0.570292	-0.001503	0	1	-1	-0.138917	0.138917	107	0	0	3713.54	0	0	-0.999992	0	0	0	1	11
113		0.0913685	0.532754	-0.340399	0.556914	-0.00150617	0	1	-1	-0.140424	0.140424	108	0	0	3706.6	0	0	-0.999992	0	0	0	1	11
114		0.0943863	0.519529	-0.337381	0.543566	-0.00150936	0	1	-1	-0.141933	0.141933	109	0	0	3699.73	0	0	-0.999991	0	0	0	1	11
115		0.0973763	0.506333	-0.334391	0.530247	-0.00151238	0	1	-1	-0.143445	0.143445	110	0	0	3693.28	0	0	-0.999991	0	0	0	1	11
116		0.100338	0.493168	-0.331429	0.516959	-0.00151507	0	1	-1	-0.14496	0.14496	111	0	0	3687.43	0	0	-0.999991	0	0	0	1	11
117		0.103273	0.480032	-0.328495	0.5037	-0.00151737	0	1	-1	-0.146478	0.146478	112	0	0	3682.31	0	0	-0.999991	0	0	0	1	11
118		0.106179	0.466927	-0.325588	0.490473	-0.00151922	0	1	-1	-0.147997	0.147997	113	0	0	3678.04	0	0	-0.999991	0	0	0	1	11
119		0.109057	0.453853	-0.32271	0.477277	-0.0015206	0	1	-1	-0.149518	0.149518	114	0	0	3674.68	0	0	-0.999991	0	0	0	1	11
120		0.111908	0.44081	-0.319859	0.464113	-0.0015215	0	1	-1	-0.151039	0.151039	115	0	0	3672.11	0	0	-0.999991	0	0	0	1	11
121		0.114731	0.427799	-0.317037	0.450981	-0.00152195	0	1	-1	-0.152561	0.152561	116	0	0	3670.04	0	0	-0.99999	0	0	0	1	11
122		0.117526	0.414821	-0.314242	0.437881	-0.001522	0	1	-1	-0.154083	0.154083	117	0	0	3668.33	0	0	-0.99999	0	0	0	1	11
123		0.120293	0.401875	-0.311475	0.424815	-0.00152186	0	1	-1	-0.155605	0.155605	118	0	0	3666.85	0	0	-0.99999	0	0	0	1	11
124		0.123032	0.388962	-0.308735	0.411782	-0.00152196	0	1	-1	-0.157127	0.157127	119	0	0	3665.48	0	0	-0.99999	0	0	0	1	11
125		0.125744	0.376082	-0.306024	0.398782	-0.00152277	0	1	-1	-0.15865	0.15865	120	0	0	3664.05	0	0	-0.99999	0	0	0	1	11
126		0.128427	0.363237	-0.30334	0.385817	-0.00152375	0	1	-1	-0.160173	0.160173	121	0	0	3662.34	0	0	-0.99999	0	0	0	1	11
127		0.131083	0.350425	-0.300684	0.372886	-0.00152474	0	1	-1	-0.161698	0.161698	122	0	0	3660.2	0	0	-0.99999	0	0	0	1	11
128		0.133712	0.337649	-0.298055	0.35999	-0.00152574	0	1	-1	-0.163224	0.163224	123	0	0	3657.66	0	0	-0.999989	0	0	0	1	11
129		0.136313	0.324907	-0.295455	0.347129	-0.00152684	0	1	-1	-0.164751	0.164751	124	0	0	3654.88	0	0	-0.999989	0	0	0	1	11
130		0.138886	0.3122	-0.292881	0.334305	-0.00152836	0	1	-1	-0.166279	0.166279	125	0	0	3652.2	0	0	-0.999989	0	0	0	1	11
131		0.141432	0.29953	-0.290336	0.321516	-0.00152999	0	1	-1	-0.167809	0.167809	126	0	0	3649.84	0	0	-0.999989	0	0	0	1	11
132		0.14395	0.286895	-0.287817	0.308763	-0.00153141	0	1	-1	-0.16934	0.16934	127	0	0	3647.99	0	0	-0.999989	0	0	0	1	11
133		0.146441	0.274297	-0.285327	0.296048	-0.0015324	0	1	-1	-0.170873	0.170873	128	0	0	3646.85	0	0	-0.999989	0	0	0	1	11
134		0.148904	0.261736	-0.282864	0.28337	-0.00153284	0	1	-1	-0.172406	0.172406	129	0	0	3646.66	0	0	-0.999988	0	0	0	1	11
135		0.151339	0.249212	-0.280428	0.270729	-0.00153264	0	1	-1	-0.173938	0.173938	130	0	0	3647.76	0	0	-0.999988	0	0	0	1	11
136		0.153748	0.236725	-0.278019	0.258126	-0.00153172	0	1	-1	-0.17547	0.17547	131	0	0	3650.4	0	0	-0.999988	0	0	0	1	11
137		0.156129	0.224277	-0.275638	0.245561	-0.00153004	0	1	-1	-0.177	0.177	132	0	0	3654.77	0	0	-0.999988	0	0	0	1	11
138		0.158483	0.211866	-0.273284	0.233035	-0.00152756	0	1	-1	-0.178528	0.178528	133	0	0	3660.99	0	0	-0.999988	0	0	0	1	11
139		0.16081	0.199494	-0.270957	0.220548	-0.00152422	0	1	-1	-0.180052	0.180052	134	0	0	3669.16	0	0	-0.999988	0	0	0	1	11
140		0.16311	0.187162	-0.268657	0.2081	-0.00152003	0	1	-1	-0.181572	0.181572	135	0	0	3679.35	0	0	-0.999987	0	0	0	1	11
141		0.165383	0.174868	-0.266384	0.195692	-0.00151496	0	1	-1	-0.183087	0.183087	136	0	0	3691.64	0	0	-0.999987	0	0	0	1	11
142		0.16763	0.162614	-0.264137	0.183324	-0.00150905	0	1	-1	-0.184596	0.184596	137	0	0	3706.09	0	0	-0.999987	0	0	0	1	11
143		0.16985	0.1504	-0.261917	0.170996	-0.00150229	0	1	-1	-0.186098	0.186098	138	0	0	3722.76	0	0	-0.999987	0	0	0	1	11
144		0.172044	0.138226	-0.259724	0.158708	-0.00149469	0	1	-1	-0.187593	0.187593	139	0	0	3741.7	0	0	-0.999987	0	0	0	1	11
145		0.174211	0.126092	-0.257556	0.146461	-0.00148627	0	1	-1	-0.189079	0.189079	140	0	0	3762.99	0	0	-0.999987	0	0	0	1	11
146		0.176353	0.113999	-0.255414	0.134256	-0.001477	0	1	-1	-0.190556	0.190556	141	0	0	3786.69	0	0	-0.999987	0	0	0	1	11
147		0.178469	0.101947	-0.253299	0.122092	-0.00146687	0	1	-1	-0.192023	0.192023	142	0	0	3812.85	0	0	-0.999987	0	0	0	1	11
148		0.180559	0.0899366	-0.251209	0.109969	-0.00145589	0	1	-1	-0.193479	0.193479	143	0	0	3841.53	0	0	-0.999987	0	0	0	1	11
149		0.182624	0.0779676	-0.249144	0.0978886	-0.00144406	0	1	-1	-0.194923	0.194923	144	0	0	3872.77	0	0	-0.999987	0	0	0	1	11
150		0.184663	0.0660405	-0.247104	0.0858503	-0.00143142	0	1	-1	-0.196354	0.196354	145	0	0	3906.56	0	0	-0.999987	0	0	0	1	11
151		0.186678	0.0541554	-0.245089	0.0738545	-0.00141801	0	1	-1	-0.197772	0.197772	146	0	0	3942.87	0	0	-0.999987	0	0	0	1	11
152		0.188668	0.0423127	-0.243099	0.0619014	-0.0014039	0	1	-1	-0.199176	0.199176	147	0	0	3981.62	0	0	-0.999987	0	0	0	1	11
153		0.190634	0.0305126	-0.241133	0.0499913	-0.00138921	0	1	-1	-0.200566	0.200566	148	0	0	4022.66	0	0	-0.999987	0	0	0	1	11
154		0.192576	0.0187554	-0.239191	0.0381245	-0.00137405	0	1	-1	-0.20194	0.20194	149	0	0	4065.83	0	0	-0.999987	0	0	0	1	11
155		0.194494	0.00704114	-0.237273	0.0263011	-0.00135856	0	1	-1	-0.203298	0.203298	150	0	0	4110.91	0	0	-0.999987	0	0	0	1	11
156		0.196389	-0.0046298	-0.235378	0.0145213	-0.00134288	0	1	-1	-0.204641	0.204641	151	0	0	4157.65	0	0	-0.999987	0	0	0	1	11
157		0.19826	-0.0162572	-0.233507	0.00278553	-0.00132715	0	1	-1	-0.205968	0.205968	152	0	0	4205.82	0	0	-0.999987	0	0	0	1	11
158		0.200109	-0.027841	-0.231659	-0.00890617	-0.00131147	0	1	-1	-0.20728	0.20728	153	0	0	4255.15	0	0	-0.999987	0	0	0	1	11
159		0.201934	-0.0393808	-0.229833	-0.0205536	-0.00129593	0	1	-1	-0.208576	0.208576	154	0	0	4305.4	0	0	-0.999987	0	0	0	1	11
160		0.203738	-0.0508765	-0.228029	-0.0321564	-0.0012806	0	1	-1	-0.209856	0.209856	155	0	0	4356.36	0	0	-0.999987	0	0	0	1	11
161		0.205519	-0.062328	-0.226248	-0.0437146	-0.00126552	0	1	-1	-0.211122	0.211122	156	0	0	4407.85	0	0	-0.999987	0	0	0	1	11
162		0.207279	-0.0737349	-0.224489	-0.0552279	-0.00125073	0	1	-1	-0.212372	0.212372	157	0	0	4459.7	0	0	-0.999988	0	0	0	1	11
163		0.209016	-0.0850973	-0.222751	-0.0666962	-0.00123623	0	1	-1	-0.213609	0.213609	158	0	0	4511.78	0	0	-0.999988	0	0	0	1	11
164		0.210733	-0.0964149	-0.221034	-0.0781192	-0.00122205	0	1	-1	-0.214831	0.214831	159	0	0	4563.98	0	0	-0.999988	0	0	0	1	11
165		0.212429	-0.107687	-0.219339	-0.0894969	-0.00120817	0	1	-1	-0.216039	0.216039	160	0	0	4616.17	0	0	-0.999988	0	0	0	1	11
166		0.214103	-0.118915	-0.217664	-0.100829	-0.00119463	0	1	-1	-0.217233	0.217233	161	0	0	4668.24	0	0	-0.999988	0	0	0	1	11
167		0.215758	-0.130097	-0.21601	-0.112116	-0.00118143	0	1	-1	-0.218415	0.218415	162	0	0	4720.06	0	0	-0.999988	0	0	0	1	11
168		0.217392	-0.141234	-0.214376	-0.123356	-0.00116859	0	1	-1	-0.219584	0.219584	163	0	0	4771.46	0	0	-0.999988	0	0	0	1	11
169		0.219006	-0.152326	-0.212762	-0.134551	-0.00115614	0	1	-1	-0.22074	0.22074	164	0	0	4822.23	0	0	-0.999988	0	0	0	1	11
170		0.2206	-0.163372	-0.211168	-0.1457	-0.00114412	0	1	-1	-0.221884	0.221884	165	0	0	4872.13	0	0	-0.999988	0	0	0	1	11
171		0.222174	-0.174372	-0.209593	-0.156803	-0.00113258	0	1	-1	-0.223016	0.223016	166	0	0	4920.83	0	0	-0.999988	0	0	0	1	11
172		0.22373	-0.185327	-0.208038	-0.16786	-0.00112158	0	1	-1	-0.224138	0.224138	167	0	0	4967.96	0	0	-0.999988	0	0	0	1	11
173		0.225266	-0.196236	-0.206501	-0.178871	-0.00111118	0	1	-1	-0.225249	0.225249	168	0	0	5013.02	0	0	-0.999988	0	0	0	1	11
174		0.226783	-0.207099	-0.204984	-0.189835	-0.00110148	0	1	-1	-0.226351	0.226351	169	0	0	5055.45	0	0	-0.999988	0	0	0	1	11
175		0.228282	-0.217916	-0.203485	-0.200753	-0.00109257	0	1	-1	-0.227443	0.227443	170	0	0	5094.54	0	0	-0.999988	0	0	0	1	11
176		0.229762	-0.228688	-0.202005	-0.211625	-0.00108458	0	1	-1	-0.228528	0.228528	171	0	0	5129.39	0	0	-0.999988	0	0	0	1	11
177		0.231224	-0.239413	-0.200543	-0.22245	-0.00107767	0	1	-1	-0.229605	0.229605	172	0	0	5159.17	0	0	-0.999988	0	0	0	1	11
178		0.232668	-0.250093	-0.199099	-0.233229	-0.00107202	0	1	-1	-0.230677	0.230677	173	0	0	5183.65	0	0	-0.999988	0	0	0	1	11
179		0.234094	-0.260726	-0.197673	-0.243962	-0.00106789	0	1	-1	-0.231745	0.231745	174	0	0	5202.86	0	0	-0.999988	0	0	0	1	11
180		0.235502	-0.271314	-0.196265	-0.254649	-0.00106556	0	1	-1	-0.232811	0.232811	175	0	0	5216.92	0	0	-0.999988	0	0	0	1	11
181		0.236893	-0.281856	-0.194874	-0.265289	-0.00106505	0	1	-1	-0.233876	0.233876	176	0	0	5226.05	0	0	-0.999988	0	0	0	1	11
182		0.238266	-0.292352	-0.193501	-0.275883	-0.0010652	0	1	-1	-0.234941	0.234941	177	0	0	5230.57	0	0	-0.999988	0	0	0	1	11
183		0.239622	-0.302803	-0.192146	-0.286431	-0.00106569	0	1	-1	-0.236007	0.236007	178	0	0	5230.92	0	0	-0.999988	0	0	0	1	11
184		0.24096	-0.313208	-0.190807	-0.296933	-0.00106654	0	1	-1	-0.237073	0.237073	179	0	0	5227.69	0	0	-0.999987	0	0	0	1	11
185		0.242281	-0.323567	-0.189486	-0.307389	-0.00106776	0	1	-1	-0.238141	0.238141	180	0	0	5221.66	0	0	-0.999987	0	0	0	1	11
186		0.243585	-0.333881	-0.188182	-0.317799	-0.00106937	0	1	-1	-0.23921	0.23921	181	0	0	5213.58	0	0	-0.999987	0	0	0	1	11
187		0.244873	-0.34415	-0.186895	-0.328164	-0.00107138	0	1	-1	-0.240282	0.240282	182	0	0	5203.56	0	0	-0.999987	0	0	0	1	11
188		0.246143	-0.354374	-0.185624	-0.338483	-0.00107381	0	1	-1	-0.241356	0.241356	183	0	0	5191.57	0	0	-0.999986	0	0	0	1	11
189		0.247396	-0.364553	-0.184371	-0.348757	-0.00107667	0	1	-1	-0.242432	0.242432	184	0	0	5177.55	0	0	-0.999986	0	0	0	1	11
190		0.248633	-0.374688	-0.183134	-0.358986	-0.00107997	0	1	-1	-0.243512	0.243512	185	0	0	5161.46	0	0	-0.999986	0	0	0	1	11
191		0.249854	-0.384778	-0.181914	-0.36917	-0.00108374	0	1	-1	-0.244596	0.244596	186	0	0	5143.27	0	0	-0.999986	0	0	0	1	11
192		0.251057	-0.394823	-0.18071	-0.379309	-0.00108799	0	1	-1	-0.245684	0.245684	187	0	0	5122.92	0	0	-0.999985	0	0	0	1	11
193		0.252245	-0.404825	-0.179523	-0.389404	-0.00109274	0	1	-1	-0.246777	0.246777	188	0	0	5100.4	0	0	-0.999985	0	0	0	1	11
194		0.253416	-0.414783	-0.178352	-0.399455	-0.00109801	0	1	-1	-0.247875	0.247875	189	0	0	5075.67	0	0	-0.999984	0	0	0	1	11
195		0.254571	-0.424698	-0.177197	-0.409462	-0.00110381	0	1	-1	-0.248979	0.248979	190	0	0	5048.71	0	0	-0.999984	0	0	0	1	11
196		0.255709	-0.43457	-0.176058	-0.419426	-0.00111017	0	1	-1	-0.250089	0.250089	191	0	0	5019.49	0	0	-0.999983	0	0	0	1	11
197		0.256832	-0.444399	-0.174935	-0.429347	-0.00111711	0	1	-1	-0.251206	0.251206	192	0	0	4987.9	0	0	-0.999983	0	0	0	1	11
198		0.257938	-0.454186	-0.173829	-0.439225	-0.00112466	0	1	-1	-0.252331	0.252331	193	0	0	4953.52	0	0	-0.999982	0	0	0	1	11
199		0.259029	-0.463931	-0.172738	-0.449061	-0.00113284	0	1	-1	-0.253463	0.253463	194	0	0	4916.26	0	0	-0.999982	0	0	0	1	11
200		0.260104	-0.473634	-0.171663	-0.458855	-0.00114166	0	1	-1	-0.254605	0.254605	195	0	0	4876.34	0	0	-0.999981	0	0	0	1	11
201		0.261163	-0.483297	-0.170604	-0.468607	-0.00115138	0	1	-1	-0.255756	0.255756	196	0	0	4834.19	0	0	-0.99998	0	0	0	1	11
202		0.262206	-0.492918	-0.169561	-0.478318	-0.00116264	0	1	-1	-0.256919	0.256919	197	0	0	4790.35	0	0	-0.99998	0	0	0	1	11
203		0.263233	-0.5025	-0.168534	-0.487989	-0.00117489	0	1	-1	-0.258094	0.258094	198	0	0	4745.41	0	0	-0.999979	0	0	0	1	11
204		0.264245	-0.512041	-0.167522	-0.49762	-0.00118747	0	1	-1	-0.259281	0.259281	199	0	0	4699.96	0	0	-0.999978	0	0	0	1	11
205		0.265241	-0.521544	-0.166526	-0.507211	-0.00119999	0	1	-1	-0.260481	0.260481	200	0	0	4654.58	0	0	-0.999977	0	0	0	1	11
206		0.266222	-0.531008	-0.165546	-0.516763	-0.00121222	0	1	-1	-0.261694	0.261694	201	0	0	4609.86	0	0	-0.999976	0	0	0	1	11
207		0.267187	-0.540434	-0.164581	-0.526277	-0.00122398	0	1	-1	-0.262918	0.262918	202	0	0	4566.58	0	0	-0.999975	0	0	0	1	11
208		0.268136	-0.549822	-0.163631	-0.535753	-0.00123522	0	1	-1	-0.264153	0.264153	203	0	0	4525.11	0	0	-0.999974	0	0	0	1	11
209		0.26907	-0.559174	-0.162697	-0.545192	-0.00124589	0	1	-1	-0.265399	0.265399	204	0	0	4485.35	0	0	-0.999973	0	0	0	1	11
210		0.269988	-0.568489	-0.161779	-0.554594	-0.00125608	0	1	-1	-0.266655	0.266655	205	0	0	4446.87	0	0	-0.999971	0	0	0	1	11
211		0.270891	-0.577769	-0.160876	-0.56396	-0.00126593	0	1	-1	-0.267921	0.267921	206	0	0	4408.92	0	0	-0.99997	0	0	0	1	11
212		0.271779	-0.587015	-0.159988	-0.573292	-0.00127572	0	1	-1	-0.269196	0.269196	207	0	0	4370.54	0	0	-0.999969	0	0	0	1	11
213		0.272651	-0.596226	-0.159116	-0.582589	-0.00128587	0	1	-1	-0.270482	0.270482	208	0	0	4330.61	0	0	-0.999968	0	0	0	1	11
214		0.273509	-0.605404	-0.158259	-0.591852	-0.00129692	0	1	-1	-0.271779	0.271779	209	0	0	4287.98	0	0	-0.999966	0	0	0	1	11
215		0.274351	-0.614549	-0.157416	-0.601083	-0.00130945	0	1	-1	-0.273089	0.273089	210	0	0	4241.58	0	0	-0.999965	0	0	0	1	11
216		0.275178	-0.623663	-0.156589	-0.610281	-0.00132405	0	1	-1	-0.274413	0.274413	211	0	0	4190.54	0	0	-0.999963	0	0	0	1	11
217		0.27599	-0.632745	-0.155777	-0.619449	-0.00134121	0	1	-1	-0.275754	0.275754	212	0	0	4134.27	0	0	-0.999961	0	0	0	1	11
218		0.276787	-0.641798	-0.15498	-0.628586	-0.00136123	0	1	-1	-0.277115	0.277115	213	0	0	4072.57	0	0	-0.999959	0	0	0	1	11
219		0.277569	-0.650822	-0.154198	-0.637694	-0.00138425	0	1	-1	-0.278499	0.278499	214	0	0	4005.61	0	0	-0.999956	0	0	0	1	11
220		0.278336	-0.659818	-0.153431	-0.646774	-0.0014102	0	1	-1	-0.27991	0.27991	215	0	0	3933.96	0	0	-0.999953	0	0	0	1	11
221		0.279088	-0.668786	-0.152679	-0.655826	-0.00143889	0	1	-1	-0.281349	0.281349	216	0	0	3858.48	0	0	-0.99995	0	0	0	1	11
222		0.279824	-0.677729	-0.151943	-0.664852	-0.00146999	0	1	-1	-0.282819	0.282819	217	0	0	3780.22	0	0	-0.999946	0	0	0	1	11
223		0.280545	-0.686647	-0.151222	-0.673853	-0.00150312	0	1	-1	-0.284322	0.284322	218	0	0	3700.3	0	0	-0.999941	0	0	0	1	11
224		0.281251	-0.69554	-0.150516	-0.682829	-0.00153788	0	1	-1	-0.28586	0.28586	219	0	0	3619.78	0	0	-0.999936	0	0	0	1	11
225		0.281941	-0.704411	-0.149826	-0.691783	-0.00157388	0	1	-1	-0.287433	0.287433	220	0	0	3539.63	0	0	-0.999931	0	0	0	1	11
226		0.282615	-0.713261	-0.149152	-0.700715	-0.00161077	0	1	-1	-0.289044	0.289044	221	0	0	3460.62	0	0	-0.999925	0	0	0	1	11
227		0.283273	-0.72209	-0.148494	-0.709626	-0.0016483	0	1	-1	-0.290692	0.290692	222	0	0	3383.32	0	0	-0.999918	0	0	0	1	11
228		0.283915	-0.7309	-0.147852	-0.718518	-0.00168625	0	1	-1	-0.292379	0.292379	223	0	0	3308.13	0	0	-0.99991	0	0	0	1	11
229		0.284541	-0.739692	-0.147226	-0.727393	-0.00172449	0	1	-1	-0.294103	0.294103	224	0	0	3235.24	0	0	-0.999901	0	0	0	1	11
230		0.28515	-0.748468	-0.146617	-0.73625	-0.00176297	0	1	-1	-0.295866	0.295866	225	0	0	3164.68	0	0	-0.999892	0	0	0	1	11
231		0.285743	-0.75723	-0.146025	-0.745093	-0.00180166	0	1	-1	-0.297668	0.297668	226	0	0	3096.35	0	0	-0.999881	0	0	0	1	11
232		0.286318	-0.765977	-0.145449	-0.753923	-0.00184064	0	1	-1	-0.299508	0.299508	227	0	0	3029.99	0	0	-0.999869	0	0	0	1	11
233		0.286877	-0.774713	-0.144891	-0.76274	-0.00188004	0	1	-1	-0.301389	0.301389	228	0	0	2965.25	0	0	-0.999855	0	0	0	1	11
234		0.287418	-0.783439	-0.144349	-0.771547	-0.00192009	0	1	-1	-0.303309	0.303309	229	0	0	2901.68	0	0	-0.99984	0	0	0	1	11
235		0.287942	-0.792156	-0.143826	-0.780345	-0.00196114	0	1	-1	-0.30527	0.30527	230	0	0	2838.75	0	0	-0.999822	0	0	0	1	11
236		0.288448	-0.800866	-0.14332	-0.789137	-0.00200365	0	1	-1	-0.307273	0.307273	231	0	0	2775.9	0	0	-0.999802	0	0	0	1	11
237		0.288936	-0.809572	-0.142831	-0.797923	-0.00204825	0	1	-1	-0.309322	0.309322	232	0	0	2712.54	0	0	-0.999779	0	0	0	1	11
238		0.289406	-0.818274	-0.142362	-0.806706	-0.00209568	0	1	-1	-0.311417	0.311417	233	0	0	2648.18	0	0	-0.999751	0	0	0	1	11
239		0.289857	-0.826974	-0.14191	-0.815488	-0.00214678	0	1	-1	-0.313564	0.313564	234	0	0	2582.39	0	0	-0.999719	0	0	0	1	11
240		0.29029	-0.835676	-0.141478	-0.824271	-0.0022024	0	1	-1	-0.315766	0.315766	235	0	0	2514.97	0	0	-0.999679	0	0	0	1	11
241		0.290703	-0.84438	-0.141065	-0.833056	-0.00226335	0	1	-1	-0.31803	0.31803	236	0	0	2445.9	0	0	-0.999631	0	0	0	1	11
242		0.291096	-0.853089	-0.140671	-0.841847	-0.00233022	0	1	-1	-0.32036	0.32036	237	0	0	2375.41	0	0	-0.999572	0	0	0	1	11
243		0.29147	-0.861806	-0.140298	-0.850644	-0.00240335	0	1	-1	-0.322763	0.322763	238	0	0	2303.91	0	0	-0.999497	0	0	0	1	11
244		0.291822	-0.870532	-0.139945	-0.859452	-0.00248267	0	1	-1	-0.325246	0.325246	239	0	0	2231.97	0	0	-0.999402	0	0	0	1	11
245		0.292153	-0.87927	-0.139614	-0.868271	-0.00256777	0	1	-1	-0.327814	0.327814	240	0	0	2160.19	0	0	-0.999279	0	0	0	1	11
246		0.292462	-0.888022	-0.139305	-0.877105	-0.00265784	0	1	-1	-0.330472	0.330472	241	0	0	2089.13	0	0	-0.999118	0	0	0	1	11
247		0.292748	-0.896792	-0.139019	-0.885956	-0.00275201	0	1	-1	-0.333224	0.333224	242	0	0	2019.3	0	0	-0.998902	0	0	0	1	11
248		0.29301	-0.905581	-0.138757	-0.894828	-0.00284961	0	1	-1	-0.336073	0.336073	243	0	0	1951.08	0	0	-0.998609	0	0	0	1	11
249		0.293248	-0.914393	-0.13852	-0.903722	-0.00295039	0	1	-1	-0.339024	0.339024	244	0	0	1884.76	0	0	-0.998197	0	0	0	1	11
250		0.293459	-0.923231	-0.138308	-0.912642	-0.00305441	0	1	-1	-0.342078	0.342078	245	0	0	1820.48	0	0	-0.997598	0	0	0	1	11
251		0.293645	-0.932097	-0.138123	-0.92159	-0.00316192	0	1	-1	-0.34524	0.34524	246	0	0	1758.26	0	0	-0.996685	0	0	0	1	11
252		0.293802	-0.940994	-0.137965	-0.930571	-0.00327323	0	1	-1	-0.348513	0.348513	247	0	0	1698	0	0	-0.995204	0	0	0	1	11
253		0.29393	-0.949927	-0.137837	-0.939587	-0.00338876	0	1	-1	-0.351902	0.351902	248	0	0	1639.54	0	0	-0.992585	0	0	0	1	11
254		0.294029	-0.958898	-0.137738	-0.948641	-0.00350897	0	1	-1	-0.355411	0.355411	249	0	0	1582.64	0	0	-0.987343	0	0	0	1	11
255		0.294096	-0.96791	-0.137672	-0.957738	-0.00363445	0	1	-1	-0.359045	0.359045	250	0	0	1527.06	0	0	-0.97458	0	0	0	1	11
256		0.29413	-0.976968	-0.137638	-0.96688	-0.00376597	0	1	-1	-0.362811	0.362811	251	0	0	1472.56	0	0	-0.930368	0	0	0	1	11
257		0.294129	-0.986075	-0.137638	-0.976072	-0.00390468	0	1	-1	-0.366716	0.366716	252	0	0	1418.95	0	0	-0.618472	0	0	0	1	11
258		0.294093	-0.995235	-0.137675	-0.985317	-0.00405209	0	1	-1	-0.370768	0.370768	253	0	0	1366.06	0	0	0.669928	0	0	0	1	11
259		0.294018	-1.00445	-0.137749	-0.99462	-0.00420985	0	1	-1	-0.374978	0.374978	254	0	0	1313.8	0	0	0.929995	0	0	0	1	11
260		0.293904	-1.01373	-0.137863	-1.00398	-0.00437948	0	1	-1	-0.379358	0.379358	255	0	0	1262.1	0	0	0.97145	0	0	0	1	11
261		0.293748	-1.02307	-0.13802	-1.01341	-0.00456232	0	1	-1	-0.38392	0.38392	256	0	0	1210.96	0	0	0.984396	0	0	0	1	11
262		0.293547	-1.03249	-0.138221	-1.02292	-0.00475949	0	1	-1	-0.388679	0.388679	257	0	0	1160.44	0	0	0.990025	0	0	0	1	11
263		0.293298	-1.04197	-0.138469	-1.03249	-0.00497202	0	1	-1	-0.393651	0.393651	258	0	0	1110.62	0	0	0.992973	0	0	0	1	11
264		0.293	-1.05154	-0.138767	-1.04215	-0.00520083	0	1	-1	-0.398852	0.398852	259	0	0	1061.64	0	0	0.994712	0	0	0	1	11
265		0.292648	-1.06119	-0.139119	-1.05188	-0.00544684	0	1	-1	-0.404299	0.404299	260	0	0	1013.62	0	0	0.995826	0	0	0	1	11
266		0.29224	-1.07093	-0.139527	-1.06171	-0.00571095	0	1	-1	-0.41001	0.41001	261	0	0	966.723	0	0	0.996584	0	0	0	1	11
267		0.291771	-1.08076	-0.139996	-1.07164	-0.00599408	0	1	-1	-0.416004	0.416004	262	0	0	921.068	0	0	0.997123	0	0	0	1	11
268		0.291237	-1.09069	-0.14053	-1.08166	-0.00629716	0	1	-1	-0.422301	0.422301	263	0	0	876.773	0	0	0.997522	0	0	0	1	11
269		0.290633	-1.10072	-0.141134	-1.09178	-0.00662112	0	1	-1	-0.428922	0.428922	264	0	0	833.933	833.933	1	0.997825	0	0	0	1	11
270		0.289955	-1.11086	-0.141812	-1.10202	-0.00696692	0	1	-1	-0.435889	0.435889	265	0	0	792.625	792.625	1	0.998061	0	0	0	1	11
271		0.289197	-1.12112	-0.142571	-1.11237	-0.00733547	0	1	-1	-0.443225	0.443225	266	0	0	752.909	752.909	1	0.998249	0	0	0	1	11
272		0.288352	-1.13149	-0.143415	-1.12284	-0.00772769	0	1	-1	-0.450952	0.450952	267	0	0	714.825	714.825	1	0.998401	0	0	0	1	11
273		0.287415	-1.14199	-0.144352	-1.13344	-0.00814443	0	1	-1	-0.459097	0.459097	268	0	0	678.41	678.41	1	0.998525	0	0	0	1	11
274		0.286379	-1.15262	-0.145389	-1.14417	-0.00858647	0	1	-1	-0.467683	0.467683	269	0	0	643.728	643.728	1	0.998628	0	0	0	1	11
275		0.285234	-1.16339	-0.146533	-1.15504	-0.00905453	0	1	-1	-0.476738	0.476738	270	0	0	610.829	610.829	1	0.998715	0	0	0	1	11
276		0.283974	-1.17429	-0.147793	-1.16604	-0.00954919	0	1	-1	-0.486287	0.486287	271	0	0	579.749	579.749	1	0.998789	0	0	0	1	11
277		0.28259	-1.18535	-0.149178	-1.1772	-0.0100697	0	1	-1	-0.496357	0.496357	272	0	0	550.504	550.504	1	0.998853	0	0	0	1	11
278		0.28107	-1.19655	-0.150697	-1.18851	-0.0106111	0	1	-1	-0.506968	0.506968	273	0	0	523.101	523.101	1	0.998908	0	0	0	1	11
279		0.279406	-1.2079	-0.152362	-1.19997	-0.0111703	0	1	-1	-0.518138	0.518138	274	0	0	497.534	497.534	1	0.998958	0	0	0	1	11
280		0.277585	-1.21942	-0.154182	-1.21159	-0.0117449	0	1	-1	-0.529883	0.529883	275	0	0	473.787	473.787	1	0.999002	0	0	0	1	11
281		0.275597	-1.2311	-0.156171	-1.22338	-0.0123312	0	1	-1	-0.542214	0.542214	276	0	0	451.842	451.842	1	0.999044	0	0	0	1	11
282		0.273428	-1.24294	-0.158339	-1.23533	-0.0129253	0	1	-1	-0.555139	0.555139	277	0	0	431.669	431.669	1	0.999082	0	0	0	1	11
283		0.271066	-1.25496	-0.160701	-1.24746	-0.013522	0	1	-1	-0.568661	0.568661	278	0	0	413.221	413.221	1	0.999119	0	0	0	1	11
284		0.268498	-1.26714	-0.163269	-1.25976	-0.0141156	0	1	-1	-0.582777	0.582777	279	0	0	396.449	396.449	1	0.999154	0	0	0	1	11
285		0.265709	-1.2795	-0.166058	-1.27223	-0.0146994	0	1	-1	-0.597476	0.597476	280	0	0	381.306	381.306	1	0.999187	0	0	0	1	11
286		0.262685	-1.29202	-0.169082	-1.28487	-0.0152659	0	1	-1	-0.612742	0.612742	281	0	0	367.737	367.737	1	0.99922	0	0	0	1	11
287		0.259413	-1.30472	-0.172354	-1.29769	-0.0158069	0	1	-1	-0.628549	0.628549	282	0	0	355.697	355.697	1	0.999253	0	0	0	1	11
288		0.255878	-1.31759	-0.175889	-1.31067	-0.0163137	0	1	-1	-0.644863	0.644863	283	0	0	345.152	345.152	1	0.999285	0	0	0	1	11
289		0.252066	-1.33062	-0.179701	-1.32383	-0.0167778	0	1	-1	-0.661641	0.661641	284	0	0	336.073	336.073	1	0.999317	0	0	0	1	11
290		0.247965	-1.34381	-0.183803	-1.33714	-0.0171929	0	1	-1	-0.678834	0.678834	285	0	0	164.775	164.775	1	0.99935	0	0	0	1	11
291		0.243561	-1.35715	-0.188206	-1.3506	-0.0175494	0	1	-1	-0.696383	0.696383	286	0	0	168.503	168.503	1	0.999382	0	0	0	1	11
292		0.238844	-1.37063	-0.192923	-1.36421	-0.0178373	0	1	-1	-0.71422	0.71422	287	0	0	172.391	172.391	1	0.999414	0	0	0	1	11
293		0.233806	-1.38425	-0.197961	-1.37795	-0.0180477	0	1	-1	-0.732268	0.732268	288	0	0	176.385	176.385	1	0.999447	0	0	0	1	11
294		0.228439	-1.39798	-0.203328	-1.39181	-0.170109	0	1	-1	-0.902378	0.902378	289	0	0	180.418	180.418	1	0.993088	0	0	0	1	11
295		0.220079	-1.41181	-0.211688	-1.40577	-0.00851943	0	1	-1	-0.910897	0.910897	290	0	0	184.405	184.405	1	0.992436	0	0	0	1	11
296		0.211506	-1.42572	-0.220261	-1.41981	-0.00908292	0	1	-1	-0.91998	0.91998	291	0	0	188.245	188.245	1	0.996738	0	0	0	1	11
297		0.20272	-1.43969	-0.229047	-1.43391	-0.00971436	0	1	-1	-0.929694	0.929694	292	0	0	191.822	191.822	1	0.999927	0	0	0	1	11
298		0.193719	-1.4537	-0.238048	-1.44805	-0.0104117	0	1	-1	-0.940106	0.940106	293	0	0	195.005	195.005	1	0.999919	0	0	0	1	11
299		0.184505	-1.46771	-0.247263	-1.4622	-0.0111721	0	1	-1	-0.951278	0.951278	294	0	0	103.33	103.33	1	0.999908	0	0	0	1	11
300		0.175076	-1.48171	-0.256691	-1.47632	-0.0119912	0	1	-1	-0.963269	0.963269	295	0	0	85.6357	85.6357	1	0.999896	0	0	0	1	11
301		0.165435	-1.49565	-0.266332	-1.4904	-0.0128614	0	1	-1	-0.976131	0.976131	296	0	0	84.1188	84.1188	1	0.999883	0	0	0	1	11
302		0.155585	-1.50952	-0.276183	-1.5044	-0.0137714	0	1	-1	-0.989902	0.989902	297	0	0	82.8125	82.8125	1	0.999868	0	0	0	1	11
303		0.145527	-1.52327	-0.286241	-1.51827	-0.398683	0	1	-1	-1.38859	1.38859	298	0	0	81.7182	81.7182	1	0.990788	0	0	0	1	11
304		0.135265	-1.52943	-0.296502	-1.52449	-0.108983	0	1	-1	-1.49757	1.49757	299	0	0	80.8313	80.8313	1	0.968497	0	0	0	1	11
305		0.122391	-1.53538	-0.309376	-1.53049	-0.0196621	0	1	-1	-1.51723	1.51723	300	0	0	80.1438	80.1438	1	0.965793	0	0	0	1	11
306		0.109339	-1.54109	-0.322428	-1.53626	-0.0191351	0	1	-0.777778	-1.53637	1.53637	301	0	0	88.4757	88.4757	1	0.997741	0	0	0	1	11
307		0.0961278	-1.54658	-0.335639	-1.54181	-0.0185357	0	1	-0.777778	-1.5549	1.5549	302	0	0	87.0842	87.0842	1	0.999517	0	0	0	1	11
308		0.0827831	-1.55184	-0.348984	-1.54711	-0.0179181	0	1	-0.777778	-1.57282	1.57282	303	0	0	250.147	250.147	1	0.999511	0	0	0	1	11
309		0.0693331	-1.55687	-0.362434	-1.55219	-0.0173227	0	1	-0.777778	-1.59014	1.59014	304	0	0	439.779	439.779	1	0.999506	0	0	0	1	11
310		0.0558086	-1.56166	-0.375959	-1.55702	0.0461717	1	0	-0.777778	-1.54397	1.54397	305	0	0	430.409	430.409	1	0.999802	0	0	0	1	11
311		0.0446143	-1.56622	-0.387153	-1.56162	-0.0228445	0	1	-0.777778	-1.56681	1.56681	306	0	0	420.387	420.387	1	0.999781	0	0	0	1	11
312		0.0332794	-1.57053	-0.398488	-1.56598	-0.022612	0	1	-0.777778	-1.58943	1.58943	307	0	0	409.579	409.579	1	0.999741	0	0	0	1	11
313		0.0218113	-1.5746	-0.409956	-1.57009	-0.0223807	0	1	-0.777778	-1.61181	1.61181	308	0	0	398.058	398.058	1	0.99916	0	0	0	1	11
314		0.0102177	-1.57843	-0.42155	-1.57395	-0.0221491	0	1	-0.777778	-1.63396	1.63396	309	0	0	386.022	386.022	1	0.999082	0	0	0	1	11
315		-0.0014936	-1.58202	-0.433261	-1.57757	-0.0219178	0	1	-0.777778	-1.65587	1.65587	310	0	0	301.03	301.03	1	0.998988	0	0	0	1	11
316		-0.0133143	-1.58535	-0.445082	-1.58094	-0.0216895	0	1	-0.777778	-1.67756	1.67756	311	0	0	294.579	294.579	1	0.998873	0	0	0	1	11
317		-0.0252359	-1.58845	-0.457003	-1.58406	-0.0214681	0	1	-0.777778	-1.69903	1.69903	312	0	0	289.767	289.767	1	0.998729	0	0	0	1	11
318		-0.0372495	-1.59129	-0.469017	-1.58693	-0.0212581	0	1	-0.777778	-1.72029	1.72029	313	0	0	259.551	259.551	1	0.998549	0	0	0	1	11
319		-0.0493461	-1.59389	-0.481113	-1.58955	0.00942637	1	0	-0.777778	-1.71086	1.71086	314	0	0	262.313	262.313	1	0.999317	0	0	0	1	11
320		-0.0598052	-1.59623	-0.491572	-1.59192	-0.0264998	0	1	-0.777778	-1.73736	1.73736	315	0	0	264.955	264.955	1	0.999568	0	0	0	1	11
321		-0.0704562	-1.59833	-0.502224	-1.59403	-0.025444	0	1	-0.777778	-1.76281	1.76281	316	0	0	267.449	267.449	1	0.998695	0	0	0	1	11
322		-0.0812732	-1.60018	-0.51304	-1.5959	-0.0425652	0	1	-0.777778	-1.80537	1.80537	317	0	0	269.774	269.774	1	0.994128	0	0	0	1	11
323		-0.0937902	-1.60178	-0.525558	-1.59751	-0.020111	0	1	-0.777778	-1.82548	1.82548	318	0	0	271.919	271.919	1	0.992103	0	0	0	1	11
324		-0.10634	-1.60313	-0.538108	-1.59887	-0.0200079	0	1	-1	-1.84549	1.84549	319	0	0	234.845	234.845	1	0.992175	0	0	0	1	11
325		-0.118914	-1.60423	-0.550681	-1.59998	-0.0199212	0	1	-1	-1.86541	1.86541	320	0	0	243.654	243.654	1	0.992705	0	0	0	1	11
326		-0.131503	-1.60508	-0.56327	-1.60084	-0.0198488	0	1	-1	-1.88526	1.88526	321	0	0	252.461	252.461	1	0.988724	0	0	0	1	11
327		-0.144097	-1.60568	-0.575864	-1.60145	-0.0197893	0	1	-1	-1.90505	1.90505	322	0	0	287.04	287.04	1	0.980196	0	0	0	1	11
328		-0.156689	-1.60604	-0.588456	-1.60181	-0.0197411	0	1	-1	-1.92479	1.92479	323	0	0	288.905	288.905	1	0.956546	0	0	0	1	11
329		-0.169269	-1.60614	-0.601037	-1.60192	-0.0187651	0	1	-1	-1.94356	1.94356	324	0	0	280.533	280.533	1	0.839587	0	0	0	1	11
330		-0.183009	-1.60601	-0.614777	-1.60178	-0.0182516	0	1	-1	-1.96181	1.96181	325	0	0	280.433	280.433	1	-0.10867	0	0	0	1	11
331		-0.196591	-1.60563	-0.628359	-1.6014	-0.0185918	0	1	-1	-1.9804	1.9804	326	0	0	280.168	280.168	1	-0.876862	0	0	0	1	11
332		-0.210004	-1.60501	-0.641772	-1.60077	-0.0189811	0	1	-1	-1.99938	1.99938	327	0	0	279.739	279.739	1	-0.959228	0	0	0	1	11
333		-0.223234	-1.60414	-0.655002	-1.5999	-0.0251974	0	1	-1	-2.02458	2.02458	328	0	0	279.141	279.141	1	-0.9783	0	0	0	1	11
334		-0.235436	-1.60304	-0.667203	-1.59879	-0.0199851	0	1	-1	-2.04456	2.04456	329	0	0	276.924	276.924	1	-0.986117	0	0	0	1	11
335		-0.247577	-1.6017	-0.679345	-1.59743	-0.0200182	0	1	-1	-2.06458	2.06458	330	0	0	273.82	273.82	1	-0.99143	0	0	0	1	11
336		-0.25965	-1.60012	-0.691417	-1.59584	-0.0200642	0	1	-1	-2.08465	2.08465	331	0	0	271.098	271.098	1	-0.995144	0	0	0	1	11
337		-0.271644	-1.59831	-0.703412	-1.59402	-0.0201259	0	1	-1	-2.10477	2.10477	332	0	0	268.774	268.774	1	-0.996377	0	0	0	1	11
338		-0.283554	-1.59627	-0.715321	-1.59196	-0.0202063	0	1	-1	-2.12498	2.12498	333	0	0	275.313	275.313	1	-0.997181	0	0	0	1	11
339		-0.295369	-1.594	-0.727136	-1.58967	-0.0203082	0	1	-1	-2.14529	2.14529	334	0	0	273.856	273.856	1	-0.997733	0	0	0	1	11
340		-0.307081	-1.59151	-0.738848	-1.58715	-0.0204337	0	1	-1	-2.16572	2.16572	335	0	0	272.14	272.14	1	-0.998127	0	0	0	1	11
341		-0.318682	-1.58879	-0.750449	-1.58441	-0.0205836	0	1	-1	-2.1863	2.1863	336	0	0	270.166	270.166	1	-0.998417	0	0	0	1	11
342		-0.330163	-1.58585	-0.76193	-1.58144	-0.0207578	0	1	-1	-2.20706	2.20706	337	0	0	267.952	267.952	1	-0.998636	0	0	0	1	11
343		-0.341515	-1.5827	-0.773283	-1.57826	-0.0209557	0	1	-1	-2.22802	2.22802	338	0	0	268.472	268.472	1	-0.998805	0	0	0	1	11
344		-0.35273	-1.57933	-0.784498	-1.57486	-0.0211754	0	1	-1	-2.24919	2.24919	339	0	0	257.039	257.039	1	-0.998938	0	0	0	1	11
345		-0.3638	-1.57575	-0.795567	-1.57124	-0.0214132	0	1	-1	-2.27061	2.27061	340	0	0	245.061	245.061	1	-0.999044	0	0	0	1	11
346		-0.374716	-1.57196	-0.806483	-1.56742	-0.0216626	0	1	-1	-2.29227	2.29227	341	0	0	232.765	232.765	1	-0.99913	0	0	0	1	11
347		-0.385471	-1.56796	-0.817238	-1.56338	-0.0198433	0	1	-1	-2.31211	2.31211	342	0	0	220.388	220.388	1	-0.99924	0	0	0	1	11
348		-0.396121	-1.56377	-0.827889	-1.55915	-0.0286312	0	1	-1	-2.34074	2.34074	343	0	0	208.158	208.158	1	-0.999199	0	0	0	1	11
349		-0.406408	-1.55937	-0.838176	-1.55471	-0.0299875	0	1	-1	-2.37073	2.37073	344	0	0	196.274	196.274	1	-0.999032	0	0	0	1	11
350		-0.416324	-1.55478	-0.848091	-1.55008	-0.0314136	0	1	-1	-2.40214	2.40214	345	0	0	184.902	184.902	1	-0.998874	0	0	0	1	11
351		-0.42586	-1.55	-0.857628	-1.54525	-0.032879	0	1	-1	-2.43502	2.43502	346	0	0	174.165	174.165	1	-0.998885	0	0	0	1	11
352		-0.435013	-1.54503	-0.86678	-1.54023	-0.0343496	0	1	-1	-2.46937	2.46937	347	0	0	163.043	163.043	1	-0.998889	0	0	0	1	11
353		-0.443777	-1.53987	-0.875544	-1.53503	-0.0357884	0	1	-1	-2.50516	2.50516	348	0	0	157.023	157.023	1	-0.998887	0	0	0	1	11
354		-0.452151	-1.53453	-0.883918	-1.52964	-0.0371563	0	1	-1	-2.54232	2.54232	349	0	0	151.729	151.729	1	-0.998881	0	0	0	1	11
355		-0.460135	-1.52902	-0.891902	-1.52408	-0.0384135	0	1	-1	-2.58073	2.58073	350	0	0	147.193	147.193	1	-0.998872	0	0	0	1	11
356		-0.46773	-1.52333	-0.899498	-1.51834	-0.0395212	0	1	-1	-2.62025	2.62025	351	0	0	143.43	143.43	1	-0.99886	0	0	0	1	11
357		-0.474941	-1.51747	-0.906709	-1.51242	-0.0404438	0	1	-0.777778	-2.6607	2.6607	352	0	0	225.173	225.173	1	-0.998845	0	0	0	1	11
358		-0.481773	-1.51145	-0.913541	-1.50635	-0.0411508	0	1	-0.777778	-2.70185	2.70185	353	0	0	236.693	236.693	1	-0.998829	0	0	0	1	11
359		-0.488233	-1.50527	-0.92	-1.5001	-0.0416189	0	1	-0.777778	-2.74347	2.74347	354	0	0	251.406	251.406	1	-0.998811	0	0	0	1	11
360		-0.494328	-1.49892	-0.926096	-1.4937	-0.0418337	0	1	-0.777778	-2.7853	2.7853	355	0	0	270.243	270.243	1	-0.99879	0	0	0	1	11
361		-0.500068	-1.49243	-0.931836	-1.48714	0.0928094	1	0	-0.777778	-2.69249	2.69249	356	0	0	294.54	294.54	1	-0.999575	0	0	0	1	11
362		-0.507142	-1.48578	-0.938909	-1.48044	-0.0249292	0	1	-0.777778	-2.71742	2.71742	357	0	0	326.289	326.289	1	-0.999519	0	0	0	1	11
363		-0.514018	-1.47899	-0.945785	-1.47358	-0.0247344	0	1	-0.777778	-2.74215	2.74215	358	0	0	368.6	368.6	1	-0.999666	0	0	0	1	11
364		-0.520699	-1.47206	-0.952467	-1.46658	-0.0244841	0	1	-0.777778	-2.76664	2.76664	359	0	0	426.621	426.621	1	-0.999572	0	0	0	1	11
365		-0.527187	-1.46498	-0.958954	-1.45945	-0.0241856	0	1	-0.777778	-2.79082	2.79082	360	0	0	509.527	509.527	1	-0.999579	0	0	0	1	11
366		-0.533482	-1.45778	-0.96525	-1.45217	-0.0238469	0	1	-1	-2.81467	2.81467	361	0	0	235.132	235.132	1	-0.999585	0	0	0	1	11
367		-0.539588	-1.45044	-0.971356	-1.44477	-0.0234762	0	1	-1	-2.83815	2.83815	362	0	0	238.581	238.581	1	-0.999591	0	0	0	1	11
368		-0.545508	-1.44298	-0.977275	-1.43724	-0.0230819	0	1	-1	-2.86123	2.86123	363	0	0	242.382	242.382	1	-0.999596	0	0	0	1	11
369		-0.551243	-1.4354	-0.98301	-1.42959	-0.0226725	0	1	-1	-2.8839	2.8839	364	0	0	246.479	246.479	1	-0.9996	0	0	0	1	11
370		-0.556796	-1.4277	-0.988563	-1.42182	-0.0222562	0	1	-1	-2.90616	2.90616	365	0	0	250.809	250.809	1	-0.999604	0	0	0	1	11
371		-0.56217	-1.41989	-0.993937	-1.41393	-0.0218405	0	1	-1	-2.928	2.928	366	0	0	255.303	255.303	1	-0.999606	0	0	0	1	11
372		-0.567367	-1.41197	-0.999134	-1.40594	-0.021432	0	1	-1	-2.94943	2.94943	367	0	0	259.885	259.885	1	-0.999608	0	0	0	1	11
373		-0.572389	-1.40394	-1.00416	-1.39783	-0.0210386	0	1	-1	-2.97047	2.97047	368	0	0	264.477	264.477	1	-0.999607	0	0	0	1	11
374		-0.577239	-1.39581	-1.00901	-1.38963	-0.0206667	0	1	-1	-2.99114	2.99114	369	0	0	268.997	268.997	1	-0.999605	0	0	0	1	11
375		-0.581918	-1.38759	-1.01369	-1.38133	-0.0203213	0	1	-1	-3.01146	3.01146	370	0	0	273.364	273.364	1	-0.999601	0	0	0	1	11
376		-0.586428	-1.37927	-1.0182	-1.37293	-0.0200066	0	1	-1	-3.03146	3.03146	371	0	0	277.5	277.5	1	-0.999595	0	0	0	1	11
377		-0.59077	-1.37086	-1.02254	-1.36444	-0.0197256	0	1	-1	-3.05119	3.05119	372	0	0	281.329	281.329	1	-0.999586	0	0	0	1	11
378		-0.594944	-1.36237	-1.02671	-1.35587	-0.0194804	0	1	-1	-3.07067	3.07067	373	0	0	284.786	284.786	1	-0.999573	0	0	0	1	11
379		-0.598951	-1.3538	-1.03072	-1.34722	-0.0192723	0	1	-1	-3.08994	3.08994	374	0	0	287.82	287.82	1	-0.999558	0	0	0	1	11
380		-0.602791	-1.34515	-1.03456	-1.33849	-0.0191016	0	1	-1	-3.10904	3.10904	375	0	0	290.389	290.389	1	-0.999538	0	0	0	1	11
381		-0.606465	-1.33642	-1.03823	-1.32969	-0.0189679	0	1	-1	-3.12801	3.12801	376	0	0	292.469	292.469	1	-0.999513	0	0	0	1	11
382		-0.609971	-1.32763	-1.04174	-1.32081	-0.0188704	0	1	-1	-3.14688	3.14688	377	0	0	294.05	294.05	1	-0.999482	0	0	0	1	11
383		-0.613309	-1.31878	-1.04508	-1.31188	-0.0188075	0	1	-1	-3.16569	3.16569	378	0	0	295.137	295.137	1	-0.999444	0	0	0	1	11
384		-0.616478	-1.30987	-1.04825	-1.30288	-0.018777	0	1	-1	-3.18447	3.18447	379	0	0	295.751	295.751	1	-0.999398	0	0	0	1	11
385		-0.619477	-1.3009	-1.05124	-1.29383	-0.0187762	0	1	-1	-3.20324	3.20324	380	0	0	295.927	295.927	1	-0.999341	0	0	0	1	11
386		-0.622305	-1.29188	-1.05407	-1.28472	-0.0188021	0	1	-1	-3.22204	3.22204	381	0	0	295.715	295.715	1	-0.999271	0	0	0	1	11
387		-0.62496	-1.28281	-1.05673	-1.27557	-0.018851	0	1	-1	-3.2409	3.2409	382	0	0	295.172	295.172	1	-0.999185	0	0	0	1	11
388		-0.62744	-1.2737	-1.05921	-1.26637	-0.0189189	0	1	-1	-3.25981	3.25981	383	0	0	294.354	294.354	1	-0.999077	0	0	0	1	11
389		-0.629745	-1.26455	-1.06151	-1.25714	-0.0190007	0	1	-1	-3.27881	3.27881	384	0	0	293.315	293.315	1	-0.998942	0	0	0	1	11
390		-0.631872	-1.25536	-1.06364	-1.24787	-0.0190896	0	1	-1	-3.2979	3.2979	385	0	0	292.099	292.099	1	-0.99877	0	0	0	1	11
391		-0.63382	-1.24614	-1.06559	-1.23857	-0.0191831	0	1	-1	-3.31709	3.31709	386	0	0	290.742	290.742	1	-0.998547	0	0	0	1	11
392		-0.635588	-1.2369	-1.06736	-1.22924	-0.0192803	0	1	-1	-3.33637	3.33637	387	0	0	289.266	289.266	1	-0.998253	0	0	0	1	11
393		-0.637174	-1.22763	-1.06894	-1.21988	-0.0193817	0	1	-1	-3.35575	3.35575	388	0	0	287.68	287.68	1	-0.997855	0	0	0	1	11
394		-0.638577	-1.21835	-1.07034	-1.21051	-0.019489	0	1	-1	-3.37524	3.37524	389	0	0	285.984	285.984	1	-0.997296	0	0	0	1	11
395		-0.639796	-1.20905	-1.07156	-1.20112	-0.0196049	0	1	-1	-3.39484	3.39484	390	0	0	284.165	284.165	1	-0.996479	0	0	0	1	11
396		-0.64083	-1.19973	-1.0726	-1.19172	-0.019733	0	1	-1	-3.41458	3.41458	391	0	0	282.209	282.209	1	-0.995214	0	0	0	1	11
397		-0.641677	-1.19041	-1.07344	-1.18231	-0.0198761	0	1	-1	-3.43445	3.43445	392	0	0	280.107	280.107	1	-0.993108	0	0	0	1	11
398		-0.642336	-1.18108	-1.0741	-1.1729	-0.0200364	0	1	-1	-3.45449	3.45449	393	0	0	277.859	277.859	1	-0.98922	0	0	0	1	11
399		-0.642806	-1.17175	-1.07457	-1.16348	-0.0202142	0	1	-1	-3.4747	3.4747	394	0	0	275.474	275.474	1	-0.980837	0	0	0	1	11
400		-0.643086	-1.16242	-1.07485	-1.15406	-0.0204084	0	1	-1	-3.49511	3.49511	395	0	0	272.977	272.977	1	-0.957407	0	0	0	1	11
401		-0.643173	-1.1531	-1.07494	-1.14465	-0.020616	0	1	-1	-3.51573	3.51573	396	0	0	270.404	270.404	1	-0.848774	0	0	0	1	11
402		-0.643066	-1.14378	-1.07483	-1.13525	-0.020833	0	1	-1	-3.53656	3.53656	397	0	0	267.807	267.807	1	0.0917953	0	0	0	1	11
403		-0.642763	-1.13447	-1.07453	-1.12585	-0.0210542	0	1	-1	-3.55761	3.55761	398	0	0	265.251	265.251	1	0.870903	0	0	0	1	11
404		-0.642263	-1.12518	-1.07403	-1.11647	-0.0212736	0	1	-0.777778	-3.57889	3.57889	399	0	0	320.239	320.239	1	0.96006	0	0	0	1	11
405		-0.641564	-1.1159	-1.07333	-1.10711	-0.0214842	0	1	-0.777778	-3.60037	3.60037	400	0	0	319.579	319.579	1	0.981083	0	0	0	1	11
406		-0.640663	-1.10663	-1.07243	-1.09775	-0.021678	0	1	-0.777778	-3.62205	3.62205	401	0	0	269.102	269.102	1	0.988985	0	0	0	1	11
407		-0.63956	-1.09739	-1.07133	-1.08842	-0.0218442	0	1	-0.777778	-3.64389	3.64389	402	0	0	266.373	266.373	1	0.992776	0	0	0	1	11
408		-0.638252	-1.08817	-1.07002	-1.07911	0.326074	1	0	-0.777778	-3.31782	3.31782	403	0	0	264.208	264.208	1	0.706632	0	0	0	1	11
409		-0.640005	-1.07896	-1.07177	-1.06983	-0.0200841	0	1	-0.777778	-3.3379	3.3379	404	0	0	262.701	262.701	1	-0.285143	0	0	0	1	11
410		-0.641562	-1.06979	-1.07333	-1.06056	-0.364518	0	1	-0.777778	-3.70242	3.70242	405	0	0	261.918	261.918	1	-0.481683	0	0	0	1	11
411		-0.639707	-1.06063	-1.07147	-1.05132	-0.0227455	0	1	-0.777778	-3.72517	3.72517	406	0	0	261.915	261.915	1	0.154325	0	0	0	1	11
412		-0.63764	-1.05151	-1.06941	-1.04211	-0.0225994	0	1	-0.555556	-3.74777	3.74777	407	0	0	303.019	303.019	1	0.869176	0	0	0	1	11
413		-0.635359	-1.04241	-1.06713	-1.03293	-0.0223648	0	1	-0.777778	-3.77013	3.77013	408	0	0	270.727	270.727	1	0.998224	0	0	0	1	11
414		-0.632867	-1.03334	-1.06463	-1.02377	-0.0220561	0	1	-0.777778	-3.79219	3.79219	409	0	0	94.0757	94.0757	1	0.998531	0	0	0	1	11
415		-0.630165	-1.02429	-1.06193	-1.01465	-0.0216797	0	1	-0.777778	-3.81387	3.81387	410	0	0	265.669	265.669	1	0.998771	0	0	0	1	11
416		-0.627256	-1.01528	-1.05902	-1.00555	0.335772	1	0	-0.777778	-3.4781	3.4781	411	0	0	271.199	271.199	1	0.966422	0	0	0	1	11
417		-0.627494	-1.0063	-1.05926	-0.996483	-0.0252981	0	1	-0.777778	-3.50339	3.50339	412	0	0	277.795	277.795	1	0.868632	0	0	0	1	11
418		-0.627503	-0.997346	-1.05927	-0.987447	-0.368548	0	1	-0.777778	-3.87194	3.87194	413	0	0	285.427	285.427	1	0.872532	0	0	0	1	11
419		-0.624035	-0.988423	-1.0558	-0.978442	-0.0195873	0	1	-0.777778	-3.89153	3.89153	414	0	0	294.08	294.08	1	0.867251	0	0	0	1	11
420		-0.620376	-0.979532	-1.05214	-0.969468	-0.0188895	0	1	-0.777778	-3.91042	3.91042	415	0	0	303.741	303.741	1	0.967439	0	0	0	1	11
421		-0.61653	-0.97067	-1.0483	-0.960524	-0.0182011	0	1	-1	-3.92862	3.92862	416	0	0	97.2111	97.2111	1	0.999508	0	0	0	1	11
422		-0.612504	-0.961839	-1.04427	-0.95161	-0.0175289	0	1	-1	-3.94615	3.94615	417	0	0	99.178	99.178	1	0.999574	0	0	0	1	11
423		-0.608303	-0.953038	-1.04007	-0.942727	-0.0168767	0	1	-1	-3.96303	3.96303	418	0	0	329.463	329.463	1	0.999629	0	0	0	1	11
424		-0.603931	-0.944267	-1.0357	-0.933874	-0.0162462	0	1	-1	-3.97927	3.97927	419	0	0	342.211	342.211	1	0.999675	0	0	0	1	11
425		-0.599394	-0.935525	-1.03116	-0.92505	-0.0156374	0	1	-0.777778	-3.99491	3.99491	420	0	0	242.277	242.277	1	0.999714	0	0	0	1	11
426		-0.594697	-0.926812	-1.02646	-0.916256	-0.0150486	0	1	-0.777778	-4.00996	4.00996	421	0	0	236.317	236.317	1	0.999747	0	0	0	1	11
427		-0.589844	-0.918127	-1.02161	-0.90749	-0.0144751	0	1	-0.777778	-4.02443	4.02443	422	0	0	399.936	399.936	1	0.999775	0	0	0	1	11
428		-0.58484	-0.909469	-1.01661	-0.898752	-0.0139063	0	1	-0.777778	-4.03834	4.03834	423	0	0	418.82	418.82	1	0.999799	0	0	0	1	11
429		-0.57969	-0.900839	-1.01146	-0.890042	0.335287	1	0	-0.777778	-3.70305	3.70305	424	0	0	440.022	440.022	1	0.989716	0	0	0	1	11
430		-0.577942	-0.892236	-1.00971	-0.881358	-0.0129716	0	1	-0.777778	-3.71603	3.71603	425	0	0	464.074	464.074	1	0.970518	0	0	0	1	11
431		-0.576081	-0.883658	-1.00785	-0.8727	-0.355745	0	1	-0.777778	-4.07177	4.07177	426	0	0	491.567	491.567	1	0.976559	0	0	0	1	11
432		-0.57058	-0.875105	-1.00235	-0.864068	-0.0112127	0	1	-0.777778	-4.08298	4.08298	427	0	0	523.171	523.171	1	0.964698	0	0	0	1	11
433		-0.564957	-0.866577	-0.996724	-0.85546	-0.0104663	0	1	-0.777778	-4.09345	4.09345	428	0	0	559.628	559.628	1	0.987598	0	0	0	1	11
434		-0.559221	-0.858073	-0.990989	-0.846877	-0.00971991	0	1	-1	-4.10317	4.10317	429	0	0	116.268	116.268	1	0.999909	0	0	0	1	11
435		-0.55338	-0.849593	-0.985148	-0.838317	-0.00899373	0	1	-1	-4.11216	4.11216	430	0	0	118.038	118.038	1	0.999923	0	0	0	1	11
436		-0.547442	-0.841135	-0.979209	-0.829781	-0.00830116	0	1	-1	-4.12046	4.12046	431	0	0	662.195	662.195	1	0.999935	0	0	0	1	11
437		-0.541414	-0.8327	-0.973181	-0.821267	-0.00765047	0	1	-1	-4.12811	4.12811	432	0	0	715.789	715.789	1	0.999945	0	0	0	1	11
438		-0.535304	-0.824287	-0.967071	-0.812776	-0.00704641	0	1	-1	-4.13516	4.13516	433	0	0	774.721	774.721	1	0.999954	0	0	0	1	11
439		-0.529119	-0.815896	-0.960886	-0.804307	-0.00649144	0	1	-1	-4.14165	4.14165	434	0	0	838.737	838.737	1	0.999961	0	0	0	1	11
440		-0.522865	-0.807527	-0.954632	-0.79586	-0.00598666	0	1	-1	-4.14764	4.14764	435	0	0	907.44	0	0	0.999967	0	0	0	1	11
441		-0.516549	-0.79918	-0.948316	-0.787435	-0.00553216	0	1	-1	-4.15317	4.15317	436	0	0	980.257	0	0	0.999973	0	0	0	1	11
442		-0.510176	-0.790854	-0.941944	-0.779032	-0.00512725	0	1	-1	-4.1583	4.1583	437	0	0	1056.43	0	0	0.999977	0	0	0	1	11
443		-0.503753	-0.782551	-0.93552	-0.770651	-0.00477033	0	1	-1	-4.16307	4.16307	438	0	0	1135.02	0	0	0.99998	0	0	0	1	11
444		-0.497283	-0.774269	-0.92905	-0.762292	-0.00445869	0	1	-1	-4.16753	4.16753	439	0	0	1214.95	0	0	0.999983	0	0	0	1	11
445		-0.490771	-0.76601	-0.922538	-0.753956	-0.00418847	0	1	-1	-4.17172	4.17172	440	0	0	1295.04	0	0	0.999985	0	0	0	1	11
446		-0.484221	-0.757774	-0.915988	-0.745643	-0.003955	0	1	-1	-4.17567	4.17567	441	0	0	1374.06	0	0	0.999987	0	0	0	1	11
447		-0.477636	-0.749562	-0.909404	-0.737354	-0.00375344	0	1	-1	-4.17942	4.17942	442	0	0	1450.75	0	0	0.999988	0	0	0	1	11
448		-0.47102	-0.741374	-0.902787	-0.72909	-0.00357937	0	1	-1	-4.183	4.183	443	0	0	1523.9	0	0	0.99999	0	0	0	1	11
449		-0.464376	-0.73321	-0.896143	-0.72085	-0.00342939	0	1	-1	-4.18643	4.18643	444	0	0	1592.26	0	0	0.999991	0	0	0	1	11
450		-0.457705	-0.725072	-0.889473	-0.712636	-0.00330132	0	1	-1	-4.18973	4.18973	445	0	0	1654.58	0	0	0.999991	0	0	0	1	11
451		-0.451012	-0.716961	-0.882779	-0.704449	-0.00319426	0	1	-1	-4.19293	4.19293	446	0	0	1709.55	0	0	0.999992	0	0	0	1	11
452		-0.444297	-0.708877	-0.876064	-0.69629	-0.00310813	0	1	-1	-4.19604	4.19604	447	0	0	1755.88	0	0	0.999993	0	0	0	1	11
453		-0.437563	-0.700821	-0.869331	-0.688159	-0.00304327	0	1	-1	-4.19908	4.19908	448	0	0	1792.38	0	0	0.999993	0	0	0	1	11
454		-0.430812	-0.692794	-0.862579	-0.680057	-0.0030001	0	1	-1	-4.20208	4.20208	449	0	0	1818.08	0	0	0.999993	0	0	0	1	11
455		-0.424045	-0.684797	-0.855812	-0.671986	-0.00297857	0	1	-1	-4.20506	4.20506	450	0	0	1832.42	0	0	0.999993	0	0	0	1	11
456		-0.417263	-0.676831	-0.84903	-0.663945	-0.00297795	0	1	-1	-4.20804	4.20804	451	0	0	1835.42	0	0	0.999994	0	0	0	1	11
457		-0.410467	-0.668897	-0.842234	-0.655937	-0.0029968	0	1	-1	-4.21103	4.21103	452	0	0	1827.63	0	0	0.999994	0	0	0	1	11
458		-0.403658	-0.660995	-0.835425	-0.647961	-0.00303321	0	1	-1	-4.21407	4.21407	453	0	0	1810.14	0	0	0.999994	0	0	0	1	11
459		-0.396835	-0.653126	-0.828603	-0.640019	-0.00308493	0	1	-1	-4.21715	4.21715	454	0	0	1784.44	0	0	0.999993	0	0	0	1	11
460		-0.39	-0.645291	-0.821767	-0.632112	-0.00314956	0	1	-1	-4.2203	4.2203	455	0	0	1752.18	0	0	0.999993	0	0	0	1	11
461		-0.383152	-0.637491	-0.814919	-0.624239	-0.00322482	0	1	-1	-4.22353	4.22353	456	0	0	1715.03	0	0	0.999993	0	0	0	1	11
462		-0.37629	-0.629727	-0.808057	-0.616402	-0.00330877	0	1	-1	-4.22683	4.22683	457	0	0	1674.51	0	0	0.999993	0	0	0	1	11
463		-0.369414	-0.621998	-0.801181	-0.608602	-0.00339984	0	1	-1	-4.23023	4.23023	458	0	0	1631.93	0	0	0.999992	0	0	0	1	11
464		-0.362524	-0.614307	-0.794291	-0.600838	-0.0034969	0	1	-1	-4.23373	4.23373	459	0	0	1588.34	0	0	0.999992	0	0	0	1	11
465		-0.355618	-0.606652	-0.787386	-0.593112	-0.00359906	0	1	-1	-4.23733	4.23733	460	0	0	1544.54	0	0	0.999991	0	0	0	1	11
466		-0.348697	-0.599035	-0.780464	-0.585424	-0.00370566	0	1	-1	-4.24104	4.24104	461	0	0	1501.11	0	0	0.999991	0	0	0	1	11
467		-0.341759	-0.591457	-0.773526	-0.577775	-0.0038161	0	1	-1	-4.24485	4.24485	462	0	0	1458.48	0	0	0.99999	0	0	0	1	11
468		-0.334803	-0.583917	-0.766571	-0.570165	-0.00392988	0	1	-1	-4.24878	4.24878	463	0	0	1416.9	0	0	0.99999	0	0	0	1	11
469		-0.327829	-0.576415	-0.759596	-0.562594	-0.00404655	0	1	-1	-4.25283	4.25283	464	0	0	1376.57	0	0	0.999989	0	0	0	1	11
470		-0.320834	-0.568953	-0.752601	-0.555062	-0.00416574	0	1	-1	-4.25699	4.25699	465	0	0	1337.59	0	0	0.999988	0	0	0	1	11
471		-0.313818	-0.561531	-0.745585	-0.547571	-0.00428717	0	1	-1	-4.26128	4.26128	466	0	0	1300.02	0	0	0.999988	0	0	0	1	11
472		-0.306779	-0.554148	-0.738546	-0.540119	-0.00441059	0	1	-1	-4.26569	4.26569	467	0	0	1263.91	0	0	0.999987	0	0	0	1	11
473		-0.299716	-0.546805	-0.731483	-0.532708	-0.00453582	0	1	-1	-4.27023	4.27023	468	0	0	1229.28	0	0	0.999986	0	0	0	1	11
474		-0.292627	-0.539502	-0.724394	-0.525337	-0.00466272	0	1	-1	-4.27489	4.27489	469	0	0	1196.16	0	0	0.999986	0	0	0	1	11
475		-0.285511	-0.532239	-0.717278	-0.518006	-0.00479104	0	1	-1	-4.27968	4.27968	470	0	0	1164.57	0	0	0.999985	0	0	0	1	11
476		-0.278366	-0.525016	-0.710133	-0.510715	-0.00492023	0	1	-1	-4.2846	4.2846	471	0	0	1134.58	0	0	0.999984	0	0	0	1	11
477		-0.27119	-0.517833	-0.702958	-0.503465	-0.00504958	0	1	-1	-4.28965	4.28965	472	0	0	1106.28	0	0	0.999983	0	0	0	1	11
478		-0.263982	-0.510689	-0.695749	-0.496255	-0.00517825	0	1	-1	-4.29483	4.29483	473	0	0	1079.84	0	0	0.999982	0	0	0	1	11
479		-0.256739	-0.503586	-0.688506	-0.489085	-0.00530491	0	1	-0.777778	-4.30013	4.30013	474	0	0	128.737	128.737	1	0.999981	0	0	0	1	11
480		-0.24946	-0.496522	-0.681227	-0.481956	-0.00542755	0	1	-0.777778	-4.30556	4.30556	475	0	0	134.601	134.601	1	0.99998	0	0	0	1	11
481		-0.242142	-0.489498	-0.67391	-0.474866	-0.00554326	0	1	-0.777778	-4.31111	4.31111	476	0	0	141.793	141.793	1	0.999979	0	0	0	1	11
482		-0.234785	-0.482513	-0.666552	-0.467816	-0.00564802	0	1	-0.777778	-4.31675	4.31675	477	0	0	150.664	150.664	1	0.999978	0	0	0	1	11
483		-0.227386	-0.475568	-0.659154	-0.460807	0.432114	1	0	-0.777778	-3.88464	3.88464	478	0	0	161.69	161.69	1	0.990567	0	0	0	1	11
484		-0.2246	-0.468663	-0.656368	-0.453837	-0.0217909	0	1	-0.777778	-3.90643	3.90643	479	0	0	175.542	175.542	1	0.974726	0	0	0	1	11
485		-0.221653	-0.461797	-0.653421	-0.446907	-0.0238527	0	1	-0.777778	-3.93028	3.93028	480	0	0	193.189	193.189	1	0.975473	0	0	0	1	11
486		-0.218528	-0.454971	-0.650295	-0.440018	-0.0259106	0	1	-0.777778	-3.95619	3.95619	481	0	0	216.091	216.091	1	0.999267	0	0	0	1	11
487		-0.215204	-0.448185	-0.646971	-0.433168	-0.0279183	0	1	-0.777778	-3.98411	3.98411	482	0	0	246.555	246.555	1	0.999208	0	0	0	1	11
488		-0.211661	-0.441439	-0.643428	-0.42636	-0.0298235	0	1	-1	-4.01393	4.01393	483	0	0	190.529	190.529	1	0.999155	0	0	0	1	11
489		-0.207879	-0.434734	-0.639646	-0.419592	-0.0315706	0	1	-1	-4.04551	4.04551	484	0	0	90.057	90.057	1	0.999111	0	0	0	1	11
490		-0.203836	-0.428069	-0.635604	-0.412865	-0.0331046	0	1	-1	-4.07861	4.07861	485	0	0	92.6455	92.6455	1	0.999077	0	0	0	1	11
491		-0.199511	-0.421445	-0.631278	-0.406179	-0.0343751	0	1	-1	-4.11299	4.11299	486	0	0	95.7701	95.7701	1	0.999053	0	0	0	1	11
492		-0.194881	-0.414864	-0.626649	-0.399536	-0.0353411	0	1	-1	-4.14833	4.14833	487	0	0	99.5155	99.5155	1	0.999039	0	0	0	1	11
493		-0.189926	-0.408324	-0.621694	-0.392936	-0.315972	0	1	-1	-4.4643	4.4643	488	0	0	103.981	103.981	1	0.984427	0	0	0	1	11
494		-0.180562	-0.401827	-0.612329	-0.386379	-0.00826583	0	1	-1	-4.47256	4.47256	489	0	0	109.282	109.282	1	0.984685	0	0	0	1	11
495		-0.171094	-0.395375	-0.602862	-0.379866	-0.00821821	0	1	-1	-4.48078	4.48078	490	0	0	115.557	115.557	1	0.993977	0	0	0	1	11
496		-0.161525	-0.388966	-0.593292	-0.373398	-0.00817487	0	1	-1	-4.48896	4.48896	491	0	0	122.969	122.969	1	0.999945	0	0	0	1	11
497		-0.151854	-0.382604	-0.583621	-0.366975	-0.00814452	0	1	-1	-4.4971	4.4971	492	0	0	131.713	131.713	1	0.999945	0	0	0	1	11
498		-0.142082	-0.376287	-0.573849	-0.3606	-0.008132	0	1	-1	-4.50523	4.50523	493	0	0	681.215	681.215	1	0.999945	0	0	0	1	11
499		-0.132209	-0.370019	-0.563976	-0.354273	-0.00813978	0	1	-1	-4.51337	4.51337	494	0	0	680.214	680.214	1	0.999944	0	0	0	1	11
500		-0.122235	-0.363799	-0.554003	-0.347995	-0.00816877	0	1	-1	-4.52154	4.52154	495	0	0	677.867	677.867	1	0.999943	0	0	0	1	11
501		-0.11216	-0.357629	-0.543928	-0.341768	-0.00821865	0	1	-1	-4.52976	4.52976	496	0	0	674.164	674.164	1	0.999942	0	0	0	1	11
502		-0.101983	-0.351511	-0.533751	-0.335593	-0.00828799	0	1	-1	-4.53805	4.53805	497	0	0	669.247	669.247	1	0.99994	0	0	0	1	11
503		-0.0917026	-0.345445	-0.52347	-0.329471	-0.00837431	0	1	-1	-4.54642	4.54642	498	0	0	663.367	663.367	1	0.999938	0	0	0	1	11
504		-0.081317	-0.339434	-0.513084	-0.323403	-0.00847393	0	1	-1	-4.5549	4.5549	499	0	0	656.857	656.857	1	0.999936	0	0	0	1	11
505		-0.0708245	-0.333478	-0.502592	-0.317392	-0.00858192	0	1	-1	-4.56348	4.56348	500	0	0	650.093	650.093	1	0.999933	0	0	0	1	11
506		-0.0602228	-0.32758	-0.49199	-0.311439	-0.00869208	0	1	-1	-4.57217	4.57217	501	0	0	643.464	643.464	1	0.99993	0	0	0	1	11
507		-0.0495096	-0.32174	-0.481277	-0.305544	-0.00879735	0	1	-1	-4.58097	4.58097	502	0	0	637.344	637.344	1	0.999927	0	0	0	1	11
508		-0.0386827	-0.31596	-0.47045	-0.299711	-0.00889042	0	1	-1	-4.58986	4.58986	503	0	0	632.071	632.071	1	0.999923	0	0	0	1	11
509		-0.0277399	-0.310243	-0.459507	-0.29394	-0.00896463	0	1	-1	-4.59882	4.59882	504	0	0	627.927	627.927	1	0.99992	0	0	0	1	11
510		-0.0166796	-0.304589	-0.448447	-0.288234	-0.00901479	0	1	-1	-4.60784	4.60784	505	0	0	625.133	625.133	1	0.999916	0	0	0	1	11
511		-0.00550076	-0.299	-0.437268	-0.282593	-0.00903764	0	1	-1	-4.61688	4.61688	506	0	0	623.829	623.829	1	0.999913	0	0	0	1	11
512		0.00579713	-0.293478	-0.42597	-0.27702	-0.00903199	0	1	-1	-4.62591	4.62591	507	0	0	624.086	624.086	1	0.999911	0	0	0	1	11
513		0.0172137	-0.288025	-0.414554	-0.271515	-0.00899846	0	1	-1	-4.63491	4.63491	508	0	0	625.914	625.914	1	0.999908	0	0	0	1	11
514		0.0287476	-0.282642	-0.40302	-0.266082	-0.00893955	0	1	-1	-4.64385	4.64385	509	0	0	629.269	629.269	1	0.999906	0	0	0	1	11
515		0.0403969	-0.27733	-0.39137	-0.260721	-0.0088601	0	1	-1	-4.65271	4.65271	510	0	0	634.065	634.065	1	0.999905	0	0	0	1	11
516		0.0521587	-0.272092	-0.379609	-0.255434	-0.00876417	0	1	-1	-4.66147	4.66147	511	0	0	640.188	640.188	1	0.999903	0	0	0	1	11
517		0.0640296	-0.266928	-0.367738	-0.250222	-0.00865531	0	1	-1	-4.67013	4.67013	512	0	0	647.504	647.504	1	0.999902	0	0	0	1	11
518		0.0760056	-0.261841	-0.355762	-0.245088	-0.00853667	0	1	-1	-4.67866	4.67866	513	0	0	655.875	655.875	1	0.999902	0	0	0	1	11
519		0.0880819	-0.256832	-0.343685	-0.240032	-0.00841084	0	1	-1	-4.68707	4.68707	514	0	0	665.171	665.171	1	0.999901	0	0	0	1	11
520		0.100254	-0.251902	-0.331514	-0.235056	-0.00827991	0	1	-1	-4.69535	4.69535	515	0	0	675.289	675.289	1	0.999901	0	0	0	1	11
521		0.112515	-0.247053	-0.319252	-0.230161	-0.00814529	0	1	-1	-4.7035	4.7035	516	0	0	686.153	686.153	1	0.999901	0	0	0	1	11
522		0.124861	-0.242285	-0.306907	-0.225349	-0.00800812	0	1	-0.777778	-4.71151	4.71151	517	0	0	4140.42	0	0	0.9999	0	0	0	1	11
523		0.137284	-0.237601	-0.294483	-0.220621	-0.00786909	0	1	-0.555556	-4.71938	4.71938	518	0	0	1730.37	0	0	0.9999	0	0	0	1	11
524		0.149778	-0.233001	-0.281989	-0.215978	-0.00772843	0	1	-0.333333	-4.7271	4.7271	519	0	0	1071.96	0	0	0.9999	0	0	0	1	11
525		0.162337	-0.228486	-0.26943	-0.211422	-0.00758619	0	1	-0.111111	-4.73469	4.73469	520	0	0	766.063	0	0	0.9999	0	0	0	0	11
526		0.174953	-0.224058	-0.256814	-0.206953	0.0766986	1	0	-0.111111	-4.65799	4.65799	521	0	0	1141.64	0	0	0.999386	0	0	0	0	11
527		0.184839	-0.219718	-0.246929	-0.202572	0.00836359	1	0	-0.111111	-4.64963	4.64963	522	0	0	1159.47	0	0	0.998298	0	0	0	0	11
528		0.194308	-0.215466	-0.237459	-0.19828	0.00942228	1	0	-0.111111	-4.64021	4.64021	523	0	0	1176.85	0	0	0.998416	0	0	0	0	11
529		0.203352	-0.211303	-0.228416	-0.194078	0.0104347	1	0	-0.111111	-4.62977	4.62977	524	0	0	1193.9	0	0	0.999893	0	0	0	0	11
530		0.211963	-0.20723	-0.219804	-0.189967	-0.117734	0	1	-0.111111	-4.74751	4.74751	525	0	0	1210.75	0	0	0.997884	0	0	0	0	11
531		0.223789	-0.203247	-0.207978	-0.185947	-0.00733142	0	1	-0.333333	-4.75484	4.75484	526	0	0	401.71	401.71	1	0.996036	0	0	0	1	11
532		0.235628	-0.199356	-0.196139	-0.18202	-0.00722898	0	1	-0.555556	-4.76207	4.76207	527	0	0	358.446	358.446	1	0.997575	0	0	0	1	11
533		0.247474	-0.195556	-0.184293	-0.178185	-0.00711893	0	1	-0.777778	-4.76918	4.76918	528	0	0	321.716	321.716	1	0.999896	0	0	0	1	11
534		0.259321	-0.191849	-0.172446	-0.174442	-0.00700042	0	1	-1	-4.77619	4.77619	529	0	0	290.386	290.386	1	0.999895	0	0	0	1	11
535		0.271162	-0.188233	-0.160605	-0.170793	-0.00687193	0	1	-1	-4.78306	4.78306	530	0	0	816.779	816.779	1	0.999894	0	0	0	1	11
536		0.282989	-0.184709	-0.148778	-0.167237	-0.00673185	0	1	-1	-4.78979	4.78979	531	0	0	834.32	834.32	1	0.999894	0	0	0	1	11
537		0.294795	-0.181278	-0.136972	-0.163773	-0.00657952	0	1	-1	-4.79637	4.79637	532	0	0	854.167	0	0	0.999894	0	0	0	1	11
538		0.306571	-0.177938	-0.125196	-0.160402	-0.00641363	0	1	-1	-4.80278	4.80278	533	0	0	876.653	0	0	0.999894	0	0	0	1	11
539		0.318309	-0.17469	-0.113459	-0.157124	-0.00623321	0	1	-1	-4.80902	4.80902	534	0	0	902.126	0	0	0.999895	0	0	0	1	11
540		0.329998	-0.171533	-0.10177	-0.153937	-0.00603823	0	1	-1	-4.81505	4.81505	535	0	0	930.935	0	0	0.999897	0	0	0	1	11
541		0.341628	-0.168466	-0.090139	-0.150842	-0.00582983	0	1	-1	-4.82088	4.82088	536	0	0	963.453	0	0	0.999899	0	0	0	1	11
542		0.35319	-0.165489	-0.0785774	-0.147837	-0.00561022	0	1	-1	-4.82649	4.82649	537	0	0	1000.14	0	0	0.999902	0	0	0	1	11
543		0.364671	-0.162601	-0.0670961	-0.144922	-0.00538224	0	1	-0.777778	-4.83188	4.83188	538	0	0	132.883	132.883	1	0.999905	0	0	0	1	11
544		0.376061	-0.1598	-0.0557066	-0.142095	-0.00514853	0	1	-0.555556	-4.83702	4.83702	539	0	0	109.228	109.228	1	0.999909	0	0	0	1	11
545		0.387347	-0.157086	-0.0444203	-0.139356	-0.00491034	0	1	-0.333333	-4.84193	4.84193	540	0	0	89.2752	89.2752	1	0.999914	0	0	0	1	11
546		0.398518	-0.154457	-0.0332489	-0.136702	-0.00466677	0	1	-0.333333	-4.8466	4.8466	541	0	0	1709.4	0	0	0.999918	0	0	0	1	11
547		0.409564	-0.151911	-0.0222037	-0.134133	0.421895	1	0	-0.333333	-4.42471	4.42471	542	0	0	1822.98	0	0	0.988947	0	0	0	1	11
548		0.412832	-0.149447	-0.0189358	-0.131646	0.0756476	1	0	-0.333333	-4.34906	4.34906	543	0	0	1954.3	0	0	0.961553	0	0	0	1	11
549		0.415541	-0.147064	-0.0162263	-0.12924	0.0967594	1	0	-0.333333	-4.2523	4.2523	544	0	0	2107.27	0	0	0.937727	0	0	0	1	11
550		0.4177	-0.144758	-0.0140675	-0.126913	-0.597975	0	1	-0.333333	-4.85027	4.85027	545	0	0	2287.39	0	0	0.942246	0	0	0	1	11
551		0.427537	-0.142529	-0.00423078	-0.124663	-0.00377916	0	1	-0.333333	-4.85405	4.85405	546	0	0	2502.44	0	0	0.94741	0	0	0	1	11
552		0.437216	-0.140373	0.00544878	-0.122487	-0.00353032	0	1	-0.555556	-4.85758	4.85758	547	0	0	113.028	113.028	1	0.980727	0	0	0	1	11
553		0.446733	-0.138289	0.0149652	-0.120384	-0.00328241	0	1	-0.555556	-4.86087	4.86087	548	0	0	40.7809	40.7809	1	0.999952	0	0	0	1	11
554		0.456081	-0.136273	0.0243137	-0.118349	-0.00303291	0	1	-0.777778	-4.8639	4.8639	549	0	0	81.3049	81.3049	1	0.999957	0	0	0	1	11
555		0.465258	-0.134323	0.0334906	-0.116381	-0.00277931	0	1	-0.777778	-4.86668	4.86668	550	0	0	2315.34	0	0	0.999962	0	0	0	1	11
556		0.474261	-0.132436	0.0424937	-0.114476	-0.00251862	0	1	-0.777778	-4.8692	4.8692	551	0	0	2604.91	0	0	0.999967	0	0	0	1	11
557		0.483089	-0.130609	0.0513215	-0.112632	1.75209	1	0	-0.777778	-3.11711	3.11711	552	0	0	3010.33	0	0	0.96736	0	0	0	1	11
558		0.48236	-0.128838	0.0505925	-0.110845	-1.75311	0	1	-0.777778	-4.87022	4.87022	553	0	0	3625.38	0	0	0.96444	0	0	0	1	11
559		0.490702	-0.12712	0.0589348	-0.109111	-0.00175266	0	1	-0.555556	-4.87197	4.87197	554	0	0	4675.5	0	0	0.962426	0	0	0	1	11
560		0.498877	-0.125451	0.06711	-0.107426	-0.00136701	0	1	-0.333333	-4.87334	4.87334	555	0	0	6877.48	0	0	0.960154	0	0	0	1	11
561		0.506885	-0.123828	0.0751181	-0.105788	-0.000932898	0	1	-0.111111	-4.87427	4.87427	556	0	0	14396.4	0	0	0.999992	0	0	0	0	11
562		0.514727	-0.122246	0.0829594	-0.104191	-0.000451062	0	1	-0.111111	-4.87472	4.87472	557	0	0	28.6498	0	0	0.999996	0	0	0	0	11
563		0.522401	-0.120701	0.090634	-0.102632	7.9577e-05	1	0	0.111111	-4.87464	4.87464	558	0	0	22182.4	0	0	0.999999	0	0	0	0	11
564		0.529909	-0.11919	0.0981422	-0.101106	0.00066106	1	0	0.333333	-4.87398	4.87398	559	0	0	6630.59	0	0	1	0	0	0	1	11
565		0.537252	-0.117706	0.105484	-0.0996088	0.00129663	1	0	0.555556	-4.87269	4.87269	560	0	0	3751.77	0	0	0.999998	0	0	0	1	11
566		0.544429	-0.116246	0.112661	-0.0981355	0.00198916	1	0	0.777778	-4.8707	4.8707	561	0	0	2545.58	0	0	0.999992	0	0	0	1	11
567		0.551441	-0.114806	0.119674	-0.0966815	0.00274206	1	0	1	-4.86796	4.86796	562	0	0	1884.95	0	0	0.999982	0	0	0	1	11
568		0.55829	-0.113379	0.126523	-0.0952417	0.00355948	1	0	1	-4.8644	4.8644	563	0	0	19.0737	19.0737	1	0.999967	0	0	0	1	11
569		0.564976	-0.111962	0.133209	-0.0938112	0.004447	1	0	1	-4.85995	4.85995	564	0	0	19.0539	19.0539	1	0.999946	0	0	0	1	11
570		0.571501	-0.110549	0.139734	-0.092385	0.00541229	1	0	0.777778	-4.85454	4.85454	565	0	0	926.714	0	0	0.999919	0	0	0	1	11
571		0.577865	-0.109135	0.146098	-0.0909577	0.00646602	1	0	0.777778	-4.84807	4.84807	566	566	1	789.401	789.401	1	0.999884	0	0	0	1	11
572		0.584069	-0.107714	0.152302	-0.0895242	2.60742	1	0	0.777778	-2.24066	2.24066	0	0	0	680.261	680.261	1	0.882886	0	0	0	1	11
573		0.579512	-0.106283	0.147745	-0.088079	0.00339737	1	0	0.777778	-2.23726	2.23726	1	0	0	591.611	591.611	1	0.272965	0	0	0	1	11
574		0.574846	-0.104834	0.143079	-0.0866168	-2.58122	0	1	0.777778	-4.81847	4.81847	2	0	0	518.338	518.338	1	-0.183444	0	0	0	1	11
575		0.580503	-0.103363	0.148735	-0.0851322	0.0114193	1	0	0.777778	-4.80705	4.80705	3	0	0	456.886	456.886	1	0.186442	0	0	0	1	11
576		0.586008	-0.101865	0.154241	-0.0836197	0.0129529	1	0	0.555556	-4.7941	4.7941	4	0	0	438.723	438.723	1	0.869629	0	0	0	1	11
577		0.591363	-0.100333	0.159596	-0.0820739	0.0146261	1	0	0.555556	-4.77947	4.77947	5	0	0	18.4873	18.4873	1	0.999569	0	0	0	1	11
578		0.596565	-0.0987631	0.164798	-0.0804893	0.0164515	1	0	0.555556	-4.76302	4.76302	6	0	0	18.4985	18.4985	1	0.999496	0	0	0	1	11
579		0.601613	-0.0971493	0.169845	-0.0788605	0.0184488	1	0	0.777778	-4.74457	4.74457	7	0	0	389.437	389.437	1	0.999419	0	0	0	1	11
580		0.606503	-0.0954864	0.174736	-0.0771822	-0.21801	0	1	0.777778	-4.96258	4.96258	8	0	0	374.66	374.66	1	0.96494	0	0	0	1	11
581		0.621836	-0.0937691	0.190069	-0.0754488	0.00439382	1	0	0.777778	-4.95819	4.95819	9	0	0	358.636	358.636	1	0.970137	0	0	0	1	11
582		0.637101	-0.0919921	0.205333	-0.0736552	0.00503023	1	0	0.777778	-4.95316	4.95316	10	0	0	184.712	184.712	1	0.990335	0	0	0	1	11
583		0.652264	-0.0901501	0.220497	-0.0717961	0.00568036	1	0	0.777778	-4.94748	4.94748	11	0	0	165.934	165.934	1	0.999685	0	0	0	1	11
584		0.667296	-0.0882382	0.235529	-0.0698664	0.0063313	1	0	0.777778	-4.94115	4.94115	12	0	0	149.994	149.994	1	0.999632	0	0	0	1	11
585		0.682172	-0.0862513	0.250405	-0.067861	0.00696141	1	0	1	-4.93419	4.93419	13	0	0	82.8043	82.8043	1	0.999584	0	0	0	1	11
586		0.696872	-0.0841846	0.265104	-0.0657749	0.426703	1	0	1	-4.50748	4.50748	14	0	0	76.2514	76.2514	1	0.979584	0	0	0	1	11
587		0.700277	-0.0820332	0.268509	-0.0636035	0.0472325	1	0	1	-4.46025	4.46025	15	0	0	70.5038	70.5038	1	0.940203	0	0	0	1	11
588		0.703479	-0.0797927	0.271711	-0.0613421	0.0506228	1	0	1	-4.40963	4.40963	16	0	0	65.488	65.488	1	0.913738	0	0	0	1	11
589		0.70648	-0.0774586	0.274713	-0.0589863	0.053776	1	0	1	-4.35585	4.35585	17	0	0	61.1336	61.1336	1	0.99805	0	0	0	1	11
590		0.709282	-0.0750267	0.277515	-0.0565317	0.0565354	1	0	1	-4.29932	4.29932	18	0	0	57.3731	57.3731	1	0.99791	0	0	0	1	11
591		0.711889	-0.0724929	0.280122	-0.0539743	0.058743	1	0	1	-4.24057	4.24057	19	0	0	98.7466	98.7466	1	0.997757	0	0	0	1	11
592		0.714303	-0.0698535	0.282536	-0.0513103	0.0602582	1	0	1	-4.18032	4.18032	20	0	0	96.7022	96.7022	1	0.997589	0	0	0	1	11
593		0.716528	-0.0671047	0.284761	-0.0485358	0.0609747	1	0	1	-4.11934	4.11934	21	0	0	95.806	95.806	1	0.997403	0	0	0	1	11
594		0.718569	-0.064243	0.286801	-0.0456475	0.0608256	1	0	1	-4.05852	4.05852	22	0	0	96.0494	96.0494	1	0.997194	0	0	0	1	11
595		0.720428	-0.0612653	0.288661	-0.042642	0.059809	1	0	1	-3.99871	3.99871	23	0	0	97.443	97.443	1	0.996956	0	0	0	1	11
596		0.722113	-0.0581685	0.290346	-0.0395164	0.0579886	1	0	1	-3.94072	3.94072	24	0	0	100.017	100.017	1	0.996682	0	0	0	1	11
597		0.723628	-0.0549498	0.291861	-0.0362676	0.0554827	1	0	1	-3.88524	3.88524	25	0	0	103.818	103.818	1	0.996359	0	0	0	1	11
598		0.724979	-0.0516065	0.293212	-0.0328933	0.0524471	1	0	1	-3.83279	3.83279	26	0	0	108.912	108.912	1	0.99597	0	0	0	1	11
599		0.726173	-0.0481365	0.294406	-0.0293908	0.0490548	1	0	1	-3.78373	3.78373	27	0	0	115.371	115.371	1	0.995487	0	0	0	1	11
600		0.727215	-0.0445374	0.295448	-0.0257583	0.0454761	1	0	1	-3.73826	3.73826	28	0	0	123.272	123.272	1	0.994868	0	0	0	1	11
601		0.728112	-0.0408075	0.296345	-0.0219936	0.0418635	1	0	1	-3.69639	3.69639	29	0	0	132.683	132.683	1	0.994039	0	0	0	1	11
602		0.72887	-0.0369452	0.297103	-0.0180952	0.0383411	1	0	1	-3.65805	3.65805	30	0	0	143.667	143.667	1	0.992873	0	0	0	1	11
603		0.729495	-0.0329489	0.297727	-0.0140617	0.0350001	1	0	1	-3.62305	3.62305	31	0	0	156.27	156.27	1	0.991132	0	0	0	1	11
604		0.729992	-0.0288176	0.298225	-0.00989189	0.031901	1	0	1	-3.59115	3.59115	32	0	0	170.528	170.528	1	0.988316	0	0	0	1	11
605		0.730367	-0.0245503	0.2986	-0.00558486	0.0290797	1	0	1	-3.56207	3.56207	33	0	0	186.468	186.468	1	0.983238	0	0	0	1	11
606		0.730624	-0.0201465	0.298856	-0.00113998	0.0265348	1	0	1	-3.53554	3.53554	34	0	0	204.124	204.124	1	0.972465	0	0	0	1	11
607		0.730767	-0.0156057	0.298999	0.00344316	0.024244	1	0	1	-3.51129	3.51129	35	0	0	223.557	223.557	1	0.942359	0	0	0	1	11
608		0.730799	-0.0109278	0.299032	0.00816466	0.0221748	1	0	1	-3.48912	3.48912	36	0	0	244.88	244.88	1	0.796792	0	0	0	1	11
609		0.730725	-0.0061129	0.298958	0.0130244	0.0202911	1	0	1	-3.46883	3.46883	37	0	0	268.296	268.296	1	-0.308789	0	0	0	1	11
610		0.730548	-0.00116143	0.29878	0.018022	0.0185583	1	0	1	-3.45027	3.45027	38	0	0	294.142	294.142	1	-0.904467	0	0	0	1	11
611		0.73027	0.003926	0.298502	0.0231569	0.0169464	1	0	1	-3.43332	3.43332	39	0	0	322.914	322.914	1	-0.971269	0	0	0	1	11
612		0.729895	0.0091485	0.298127	0.0284281	0.0154313	1	0	1	-3.41789	3.41789	40	0	0	355.297	355.297	1	-0.987353	0	0	0	1	11
613		0.729426	0.0145049	0.297659	0.0338344	0.0139952	1	0	1	-3.4039	3.4039	41	0	0	392.202	392.202	1	-0.993296	0	0	0	1	11
614		0.728867	0.019994	0.2971	0.0393746	0.0126259	1	0	1	-3.39127	3.39127	42	0	0	434.807	434.807	1	-0.996053	0	0	0	1	11
615		0.728223	0.025614	0.296456	0.045047	0.0113163	1	0	1	-3.37995	3.37995	43	0	0	484.609	484.609	1	-0.997523	0	0	0	1	11
616		0.727498	0.0313631	0.29573	0.0508497	0.0100636	1	0	1	-3.36989	3.36989	44	0	0	543.459	543.459	1	-0.998382	0	0	0	1	11
617		0.726695	0.0372393	0.294928	0.0567807	0.00886925	1	0	1	-3.36102	3.36102	45	0	0	613.563	613.563	1	-0.998918	0	0	0	1	11
618		0.725821	0.0432404	0.294054	0.0628377	0.00773916	1	0	1	-3.35328	3.35328	46	0	0	697.397	697.397	1	-0.999266	0	0	0	1	11
619		0.72488	0.0493639	0.293113	0.0690183	0.00668395	1	0	1	-3.3466	3.3466	47	0	0	797.203	797.203	1	-0.9995	0	0	0	1	11
620		0.723878	0.0556071	0.29211	0.0753197	0.0057201	1	0	0.777778	-3.34088	3.34088	48	0	0	94.4371	94.4371	1	-0.999659	0	0	0	1	11
621		0.722819	0.0619672	0.291051	0.081739	0.00486888	1	0	0.777778	-3.33601	3.33601	49	0	0	105.969	105.969	1	-0.999768	0	0	0	1	11
622		0.721708	0.0684412	0.289941	0.0882734	0.00415221	1	0	0.777778	-3.33186	3.33186	50	0	0	121.751	121.751	1	-0.999841	0	0	0	1	11
623		0.72055	0.0750259	0.288783	0.0949195	0.00360697	1	0	0.777778	-3.32825	3.32825	51	0	0	144.018	144.018	1	-0.99989	0	0	0	1	11
624		0.719348	0.0817181	0.287581	0.101674	-0.583699	0	1	0.777778	-3.91195	3.91195	52	0	0	176.787	176.787	1	-0.373753	0	0	0	1	11
625		0.72231	0.0885144	0.290543	0.108534	0.0679571	1	0	0.777778	-3.84399	3.84399	53	0	0	228.054	228.054	1	0.617847	0	0	0	1	11
626		0.724769	0.0954111	0.293002	0.115495	0.0703261	1	0	0.777778	-3.77367	3.77367	54	0	0	316.192	316.192	1	0.932578	0	0	0	1	11
627		0.726718	0.102405	0.29495	0.122553	0.0715369	1	0	0.777778	-3.70213	3.70213	55	0	0	102.808	102.808	1	0.989594	0	0	0	1	11
628		0.728151	0.109491	0.296384	0.129706	0.0713468	1	0	0.555556	-3.63078	3.63078	56	0	0	115.855	115.855	1	0.982836	0	0	0	1	11
629		0.729072	0.116667	0.297304	0.136948	0.0696048	1	0	0.555556	-3.56118	3.56118	57	0	0	52.0328	52.0328	1	0.966832	0	0	0	1	11
630		0.729488	0.123927	0.297721	0.144276	0.0662769	1	0	0.333333	-3.4949	3.4949	58	0	0	59.4046	59.4046	1	0.91238	0	0	0	1	11
631		0.729418	0.131269	0.297651	0.151686	0.65172	1	0	0.111111	-2.84318	2.84318	59	0	0	92.1003	0	0	-0.561671	0	0	0	0	11
632		0.723593	0.138687	0.291826	0.159174	-0.0514239	0	1	-0.111111	-2.8946	2.8946	60	0	0	106.742	0	0	-0.87773	0	0	0	0	11
633		0.718312	0.146177	0.286545	0.166734	-0.0518013	0	1	-0.333333	-2.9464	2.9464	61	0	0	126.937	126.937	1	-0.974738	0	0	0	1	11
634		0.713551	0.153736	0.281783	0.174363	-0.0518611	0	1	-0.555556	-2.99827	2.99827	62	0	0	155.809	155.809	1	-0.997791	0	0	0	1	11
635		0.709287	0.161358	0.277519	0.182056	-0.229907	0	1	-0.777778	-3.22817	3.22817	63	0	0	199.171	199.171	1	-0.989715	0	0	0	1	11
636		0.70709	0.169039	0.275322	0.189808	-0.00328839	0	1	-1	-3.23146	3.23146	64	0	0	124.486	124.486	1	-0.981866	0	0	0	1	11
637		0.704904	0.176774	0.273137	0.197616	-0.00353235	0	1	-1	-3.23499	3.23499	65	0	0	140.951	140.951	1	-0.986794	0	0	0	1	11
638		0.702735	0.184558	0.270968	0.205473	-0.00373733	0	1	-1	-3.23873	3.23873	66	0	0	162.54	162.54	1	-0.999967	0	0	0	1	11
639		0.700585	0.192388	0.268818	0.213376	-0.00392345	0	1	-1	-3.24265	3.24265	67	0	0	191.854	191.854	1	-0.999962	0	0	0	1	11
640		0.698458	0.200257	0.266691	0.221318	-0.00410291	0	1	-1	-3.24676	3.24676	68	0	0	1366.49	0	0	-0.999957	0	0	0	1	11
641		0.696356	0.208162	0.264589	0.229296	-0.00428142	0	1	-1	-3.25104	3.25104	69	0	0	1306.56	0	0	-0.999952	0	0	0	1	11
642		0.694283	0.216096	0.262515	0.237305	-0.0044587	0	1	-1	-3.2555	3.2555	70	0	0	1254.89	0	0	-0.999946	0	0	0	1	11
643		0.692241	0.224056	0.260474	0.245339	-0.00463328	0	1	-1	-3.26013	3.26013	71	0	0	1210.26	0	0	-0.99994	0	0	0	1	11
644		0.690234	0.232036	0.258467	0.253393	-0.00480788	0	1	-1	-3.26494	3.26494	72	0	0	1172.66	0	0	-0.999933	0	0	0	1	11
645		0.688264	0.240031	0.256497	0.261462	-0.00497489	0	1	-1	-3.26991	3.26991	73	0	0	1142.8	0	0	-0.999925	0	0	0	1	11
646		0.686335	0.248035	0.254567	0.269541	-0.00511545	0	1	-1	-3.27503	3.27503	74	0	0	1121.81	0	0	-0.999917	0	0	0	1	11
647		0.684448	0.256044	0.25268	0.277625	-0.00521384	0	1	-1	-3.28024	3.28024	75	0	0	1111.05	0	0	-0.999909	0	0	0	1	11
648		0.682605	0.264053	0.250838	0.285709	-0.00525456	0	1	-1	-3.2855	3.2855	76	0	0	1112.31	0	0	-0.999902	0	0	0	1	11
649		0.680808	0.272057	0.249041	0.293787	-0.00522212	0	1	-1	-3.29072	3.29072	77	0	0	1128.05	0	0	-0.999896	0	0	0	1	11
650		0.679058	0.280049	0.247291	0.301853	-0.0051039	0	1	-1	-3.29582	3.29582	78	0	0	1161.2	0	0	-0.999892	0	0	0	1	11
651		0.677355	0.288025	0.245587	0.309904	-0.00489271	0	1	-1	-3.30072	3.30072	79	0	0	1215.64	0	0	-0.999893	0	0	0	1	11
652		0.675696	0.29598	0.243929	0.317933	-0.00458197	0	1	-1	-3.3053	3.3053	80	0	0	1297.23	0	0	-0.999897	0	0	0	1	11
653		0.674082	0.303909	0.242315	0.325936	-0.00417747	0	1	-1	-3.30948	3.30948	81	0	0	1415.19	0	0	-0.999906	0	0	0	1	11
654		0.672509	0.311806	0.240741	0.333907	-0.0037035	0	1	-1	-3.31318	3.31318	82	0	0	1584.86	0	0	-0.999918	0	0	0	1	11
655		0.670973	0.319667	0.239206	0.34184	-0.00317778	0	1	-1	-3.31636	3.31636	83	0	0	1833.47	0	0	-0.999933	0	0	0	1	11
656		0.669472	0.327485	0.237705	0.349732	-0.00261474	0	1	-1	-3.31897	3.31897	84	0	0	2213.04	0	0	-0.999949	0	0	0	1	11
657		0.668001	0.335257	0.236233	0.357576	-0.00202644	0	1	-0.777778	-3.321	3.321	85	0	0	2835.75	0	0	-0.999964	0	0	0	1	11
658		0.666556	0.342977	0.234788	0.365368	-0.00142136	0	1	-0.555556	-3.32242	3.32242	86	0	0	3998.68	0	0	-0.999978	0	0	0	1	11
659		0.665133	0.35064	0.233366	0.373103	-0.00080562	0	1	-0.333333	-3.32323	3.32323	87	0	0	6848.05	0	0	-0.999989	0	0	0	1	11
660		0.663728	0.358242	0.23196	0.380775	-0.00019296	0	1	-0.111111	-3.32342	3.32342	88	0	0	23811.1	0	0	-0.999996	0	0	0	0	11
661		0.662336	0.365777	0.230569	0.38838	0.000403198	1	0	0.111111	-3.32301	3.32301	89	0	0	139.302	0	0	-1	0	0	0	0	11
662		0.660955	0.373241	0.229188	0.395914	0.000975052	1	0	0.333333	-3.32204	3.32204	90	0	0	126.596	126.596	1	-0.999999	0	0	0	1	11
663		0.65958	0.380629	0.227813	0.403371	0.00152425	1	0	0.555556	-3.32052	3.32052	91	0	0	116.288	116.288	1	-0.999995	0	0	0	1	11
664		0.658209	0.387937	0.226441	0.410747	0.00204868	1	0	0.777778	-3.31847	3.31847	92	0	0	107.808	107.808	1	-0.999987	0	0	0	1	11
665		0.656837	0.395161	0.22507	0.418038	0.36015	1	0	1	-2.95832	2.95832	93	0	0	100.75	100.75	1	-0.954929	0	0	0	1	11
666		0.652462	0.402295	0.220694	0.425239	0.0341716	1	0	1	-2.92415	2.92415	94	0	0	94.816	94.816	1	-0.959439	0	0	0	1	11
667		0.647803	0.409337	0.216036	0.432347	0.0337561	1	0	1	-2.89039	2.89039	95	0	0	89.781	89.781	1	-0.983959	0	0	0	1	11
668		0.642862	0.416281	0.211095	0.439356	0.0331774	1	0	1	-2.85721	2.85721	96	0	0	85.4727	85.4727	1	-0.99908	0	0	0	1	11
669		0.637642	0.423125	0.205875	0.446263	0.0324537	1	0	1	-2.82476	2.82476	97	0	0	81.7543	81.7543	1	-0.999153	0	0	0	1	11
670		0.632146	0.429864	0.200379	0.453065	0.031612	1	0	0.777778	-2.79315	2.79315	98	0	0	235.539	235.539	1	-0.999219	0	0	0	1	11
671		0.626379	0.436496	0.194612	0.459758	0.0306903	1	0	0.777778	-2.76246	2.76246	99	0	0	206.209	206.209	1	-0.999279	0	0	0	1	11
672		0.620348	0.443015	0.188581	0.466339	0.0297307	1	0	0.777778	-2.73273	2.73273	100	0	0	184.132	184.132	1	-0.999332	0	0	0	1	11
673		0.614059	0.44942	0.182292	0.472803	0.0287829	1	0	0.777778	-2.70394	2.70394	101	0	0	167.054	167.054	1	-0.999379	0	0	0	1	11
674		0.60752	0.455707	0.175752	0.479149	-0.467673	0	1	0.777778	-3.17161	3.17161	102	0	0	153.572	153.572	1	-0.990583	0	0	0	1	11
675		0.605368	0.461874	0.173601	0.485373	0.00383361	1	0	0.777778	-3.16778	3.16778	103	0	0	142.764	142.764	1	-0.969957	0	0	0	1	11
676		0.603234	0.467918	0.171467	0.491473	0.00454376	1	0	0.777778	-3.16324	3.16324	104	0	0	134	134	1	-0.962564	0	0	0	1	11
677		0.601114	0.473836	0.169346	0.497447	0.00528512	1	0	0.777778	-3.15795	3.15795	105	0	0	126.836	126.836	1	-0.999963	0	0	0	1	11
678		0.599004	0.479626	0.167237	0.503291	0.00605181	1	0	0.777778	-3.1519	3.1519	106	0	0	120.948	120.948	1	-0.999951	0	0	0	1	11
679		0.596903	0.485286	0.165135	0.509004	0.00684562	1	0	0.777778	-3.14506	3.14506	107	0	0	57.7061	57.7061	1	-0.999938	0	0	0	1	11
680		0.594807	0.490815	0.163039	0.514584	0.00767456	1	0	0.555556	-3.13738	3.13738	108	0	0	57.0408	57.0408	1	-0.999923	0	0	0	1	11
681		0.592713	0.496211	0.160946	0.52003	0.00855297	1	0	0.333333	-3.12883	3.12883	109	0	0	56.5269	56.5269	1	-0.999907	0	0	0	1	11
682		0.59062	0.501472	0.158853	0.52534	0.00950133	1	0	0.333333	-3.11933	3.11933	110	0	0	727.93	727.93	1	-0.999888	0	0	0	1	11
683		0.588524	0.506596	0.156757	0.530512	-0.922907	0	1	0.333333	-4.04223	4.04223	111	0	0	628.143	628.143	1	-0.734596	0	0	0	1	11
684		0.591527	0.511583	0.159759	0.535546	-0.00632141	0	1	0.333333	-4.04855	4.04855	112	0	0	549.191	549.191	1	0.300462	0	0	0	1	11
685		0.594489	0.516432	0.162721	0.54044	-0.00346411	0	1	0.333333	-4.05202	4.05202	113	0	0	485.214	485.214	1	0.882317	0	0	0	1	11
686		0.597388	0.521142	0.16562	0.545194	0.963084	1	0	0.333333	-3.08893	3.08893	114	0	0	432.591	432.591	1	0.895948	0	0	0	1	11
687		0.595353	0.525712	0.163586	0.549807	0.0170161	1	0	0.333333	-3.07192	3.07192	115	0	0	388.923	388.923	1	0.331936	0	0	0	1	11
688		0.59329	0.530142	0.161522	0.554278	0.0183438	1	0	0.555556	-3.05357	3.05357	116	0	0	46.6927	46.6927	1	-0.7208	0	0	0	1	11
689		0.591194	0.534431	0.159427	0.558606	0.0197365	1	0	0.777778	-3.03384	3.03384	117	0	0	45.3652	45.3652	1	-0.999606	0	0	0	1	11
690		0.589065	0.538579	0.157298	0.562793	0.0211483	1	0	1	-3.01269	3.01269	118	0	0	44.1753	44.1753	1	-0.999571	0	0	0	1	11
691		0.586899	0.542585	0.155132	0.566837	0.0225414	1	0	1	-2.99015	2.99015	119	0	0	249.098	249.098	1	-0.999536	0	0	0	1	11
692		0.584696	0.54645	0.152928	0.570738	0.0238869	1	0	1	-2.96626	2.96626	120	0	0	235.654	235.654	1	-0.999503	0	0	0	1	11
693		0.582452	0.550174	0.150685	0.574496	0.0251654	1	0	1	-2.9411	2.9411	121	0	0	223.946	223.946	1	-0.999472	0	0	0	1	11
694		0.580169	0.553757	0.148401	0.578113	0.0263656	1	0	1	-2.91473	2.91473	122	0	0	213.791	213.791	1	-0.999444	0	0	0	1	11
695		0.577844	0.557199	0.146077	0.581587	0.0274838	1	0	1	-2.88725	2.88725	123	0	0	204.984	204.984	1	-0.999419	0	0	0	1	11
696		0.575479	0.560502	0.143712	0.58492	0.0285227	1	0	1	-2.85872	2.85872	124	0	0	197.327	197.327	1	-0.999396	0	0	0	1	11
697		0.573075	0.563664	0.141307	0.588112	0.0294891	1	0	1	-2.82924	2.82924	125	0	0	190.635	190.635	1	-0.999374	0	0	0	1	11
698		0.570631	0.566688	0.138864	0.591164	0.0303928	1	0	1	-2.79884	2.79884	126	0	0	184.754	184.754	1	-0.999353	0	0	0	1	11
699		0.568151	0.569573	0.136384	0.594076	0.0312443	1	0	1	-2.7676	2.7676	127	0	0	179.556	179.556	1	-0.999331	0	0	0	1	11
700		0.565635	0.57232	0.133868	0.596849	0.0320526	1	0	1	-2.73555	2.73555	128	0	0	174.95	174.95	1	-0.999306	0	0	0	1	11
701		0.563086	0.574931	0.131318	0.599484	0.0328233	1	0	1	-2.70272	2.70272	129	0	0	170.873	170.873	1	-0.999279	0	0	0	1	11
702		0.560505	0.577407	0.128738	0.601983	0.0335551	1	0	1	-2.66917	2.66917	130	0	0	167.28	167.28	1	-0.999247	0	0	0	1	11
703		0.557895	0.579747	0.126128	0.604345	0.0342373	1	0	1	-2.63493	2.63493	131	0	0	164.135	164.135	1	-0.99921	0	0	0	1	11
704		0.555258	0.581954	0.12349	0.606572	0.0348505	1	0	1	-2.60008	2.60008	132	0	0	161.406	161.406	1	-0.999166	0	0	0	1	11
705		0.552596	0.584028	0.120829	0.608666	0.0353751	1	0	1	-2.5647	2.5647	133	0	0	159.057	159.057	1	-0.999116	0	0	0	1	11
706		0.549914	0.585971	0.118146	0.610627	0.0358042	1	0	1	-2.5289	2.5289	134	0	0	157.047	157.047	1	-0.999058	0	0	0	1	11
707		0.547213	0.587783	0.115446	0.612456	0.0361462	1	0	1	-2.49275	2.49275	135	0	0	155.325	155.325	1	-0.998991	0	0	0	1	11
708		0.5445	0.589465	0.112732	0.614154	0.0364197	1	0	1	-2.45633	2.45633	136	0	0	153.824	153.824	1	-0.99891	0	0	0	1	11
709		0.541777	0.59102	0.11001	0.615723	0.0366496	1	0	1	-2.41968	2.41968	137	0	0	152.452	152.452	1	-0.998813	0	0	0	1	11
710		0.539051	0.592447	0.107283	0.617164	0.0368656	1	0	1	-2.38282	2.38282	138	0	0	151.095	151.095	1	-0.998692	0	0	0	1	11
711		0.536327	0.593748	0.104559	0.618477	0.0371015	1	0	1	-2.34572	2.34572	139	0	0	149.615	149.615	1	-0.998538	0	0	0	1	11
712		0.533611	0.594925	0.101844	0.619664	0.0373951	1	0	1	-2.30832	2.30832	140	0	0	147.866	147.866	1	-0.998335	0	0	0	1	11
713		0.530911	0.595977	0.0991432	0.620726	0.0377895	1	0	1	-2.27053	2.27053	141	0	0	145.704	145.704	1	-0.998059	0	0	0	1	11
714		0.528233	0.596907	0.0964652	0.621665	0.0383353	1	0	1	-2.2322	2.2322	142	0	0	143.009	143.009	1	-0.997672	0	0	0	1	11
715		0.525584	0.597714	0.0938171	0.62248	0.0390917	1	0	1	-2.19311	2.19311	143	0	0	139.705	139.705	1	-0.997104	0	0	0	1	11
716		0.522974	0.598401	0.0912062	0.623173	0.0401185	1	0	1	-2.15299	2.15299	144	0	0	135.769	135.769	1	-0.996224	0	0	0	1	11
717		0.520407	0.598968	0.0886399	0.623745	0.0414621	1	0	1	-2.11152	2.11152	145	0	0	131.23	131.23	1	-0.994765	0	0	0	1	11
718		0.517892	0.599416	0.0861249	0.624198	0.0431466	1	0	1	-2.06838	2.06838	146	0	0	126.172	126.172	1	-0.992117	0	0	0	1	11
719		0.515435	0.599747	0.0836674	0.624531	0.0451735	1	0	1	-2.0232	2.0232	147	0	0	120.715	120.715	1	-0.986652	0	0	0	1	11
720		0.51304	0.59996	0.0812726	0.624746	0.0475292	1	0	1	-1.97568	1.97568	148	0	0	115.007	115.007	1	-0.972788	0	0	0	1	11
721		0.510712	0.600057	0.0789451	0.624844	0.0501923	1	0	1	-1.92548	1.92548	149	0	0	109.203	109.203	1	-0.921473	0	0	0	1	11
722		0.508456	0.600039	0.0766891	0.624826	0.0531372	1	0	1	-1.87235	1.87235	150	0	0	103.452	103.452	1	-0.520896	0	0	0	1	11
723		0.506275	0.599906	0.0745082	0.624692	0.0563347	1	0	1	-1.81601	1.81601	151	0	0	97.885	97.885	1	0.728516	0	0	0	1	11
724		0.504173	0.59966	0.0724056	0.624444	0.0597498	1	0	1	-1.75626	1.75626	152	0	0	92.6077	92.6077	1	0.934699	0	0	0	1	11
725		0.502152	0.599302	0.0703846	0.624082	0.0633371	1	0	1	-1.69292	1.69292	153	0	0	87.7026	87.7026	1	0.971151	0	0	0	1	11
726		0.500215	0.598831	0.0684481	0.623607	0.067036	1	0	1	-1.62589	1.62589	154	0	0	83.2322	83.2322	1	0.983149	0	0	0	1	11
727		0.498367	0.598249	0.0665994	0.623019	0.0707658	1	0	1	-1.55512	1.55512	155	0	0	79.2439	79.2439	1	0.98849	0	0	0	1	11
728		0.496609	0.597556	0.0648413	0.62232	0.0744212	1	0	1	-1.4807	1.4807	156	0	0	75.7727	75.7727	1	0.991294	0	0	0	1	11
729		0.494944	0.596754	0.063177	0.621511	0.077871	1	0	1	-1.40283	1.40283	157	0	0	72.8445	72.8445	1	0.99291	0	0	0	1	11
730		0.493377	0.595842	0.0616095	0.620591	0.0809595	1	0	1	-1.32187	1.32187	158	0	0	70.4772	70.4772	1	0.993882	0	0	0	1	11
731		0.491909	0.594823	0.060142	0.619561	0.0835172	1	0	1	-1.23835	1.23835	159	0	0	68.6827	68.6827	1	0.994458	0	0	0	1	11
732		0.490545	0.593695	0.0587775	0.618423	0.0853779	1	0	1	-1.15298	1.15298	160	0	0	67.4684	67.4684	1	0.994763	0	0	0	1	11
733		0.489286	0.59246	0.0575191	0.617177	0.0864025	1	0	1	-1.06657	1.06657	161	0	0	66.8397	66.8397	1	0.994852	0	0	0	1	11
734		0.488137	0.591119	0.0563699	0.615823	0.0865034	1	0	1	-0.98007	0.98007	162	0	0	66.802	66.802	1	0.994744	0	0	0	1	11
735		0.4871	0.589671	0.0553329	0.614362	0.0856616	1	0	1	-0.894408	0.894408	163	0	0	67.362	67.362	1	0.994422	0	0	0	1	11
736		0.486178	0.588118	0.0544111	0.612795	0.0839308	1	0	1	-0.810478	0.810478	164	0	0	68.5285	68.5285	1	0.993829	0	0	0	1	11
737		0.485375	0.586461	0.0536075	0.611121	0.0814248	1	0	1	-0.729053	0.729053	165	0	0	70.3128	70.3128	1	0.992846	0	0	0	1	11
738		0.484693	0.584698	0.0529252	0.609343	0.0782953	1	0	1	-0.650757	0.650757	166	0	0	72.7278	72.7278	1	0.991227	0	0	0	1	11
739		0.484135	0.582832	0.0523672	0.607459	0.074708	1	0	1	-0.576049	0.576049	167	0	0	75.7879	75.7879	1	0.988442	0	0	0	1	11
740		0.483704	0.580862	0.0519366	0.60547	0.0708214	1	0	1	-0.505228	0.505228	168	0	0	79.5094	79.5094	1	0.983187	0	0	0	1	11
741		0.483404	0.578789	0.0516364	0.603378	0.0667738	1	0	1	-0.438454	0.438454	169	0	0	83.9135	83.9135	1	0.971546	0	0	0	1	11
742		0.483237	0.576612	0.0514698	0.601181	0.0626761	1	0	1	-0.375778	0.375778	170	0	0	89.0349	89.0349	1	0.937021	0	0	0	1	11
743		0.483207	0.574333	0.0514399	0.598881	0.0586108	1	0	1	-0.317167	0.317167	171	0	0	94.9214	94.9214	1	0.750642	0	0	0	1	11
744		0.483317	0.571951	0.0515496	0.596477	0.054634	1	0	1	-0.262533	0.262533	172	0	0	101.636	101.636	1	-0.468236	0	0	0	1	11
745		0.483569	0.569467	0.0518017	0.593969	0.0507672	1	0	1	-0.211766	0.211766	173	0	0	109.257	109.257	1	-0.917685	0	0	0	1	11
746		0.483966	0.56688	0.052199	0.591358	0.0469862	1	0	1	-0.16478	0.16478	174	0	0	117.882	117.882	1	-0.972841	0	0	0	1	11
747		0.484511	0.564191	0.0527434	0.588644	0.0433023	1	0	1	-0.121478	0.121478	175	0	0	127.631	127.631	1	-0.987308	0	0	0	1	11
748		0.485204	0.5614	0.0534367	0.585827	0.0397429	1	0	1	-0.0817347	0.0817347	176	0	0	138.651	138.651	1	-0.992934	0	0	0	1	11
749		0.486047	0.558506	0.0542799	0.582906	0.0363409	1	0	1	-0.0453938	0.0453938	177	0	0	151.128	151.128	1	-0.995642	0	0	0	1	11
750		0.487041	0.55551	0.0552732	0.579882	0.0331272	1	0	1	-0.0122666	0.0122666	178	0	0	165.284	165.284	1	-0.997128	0	0	0	1	11
751		0.488184	0.552411	0.0564168	0.576754	0.0301229	1	0	1	0.0178563	0.0178563	179	0	0	181.353	181.353	1	-0.998019	0	0	0	1	11
752		0.489477	0.549209	0.0577101	0.573522	0.027324	1	0	1	0.0451803	0.0451803	180	0	0	199.605	199.605	1	-0.998588	0	0	0	1	11
753		0.490919	0.545903	0.0591521	0.570186	0.0247188	1	0	1	0.0698991	0.0698991	181	0	0	220.372	220.372	1	-0.998969	0	0	0	1	11
754		0.492509	0.542493	0.0607416	0.566744	0.0222967	1	0	1	0.0921958	0.0921958	182	0	0	244.079	244.079	1	-0.999234	0	0	0	1	11
755		0.494244	0.538979	0.0624769	0.563197	0.0200536	1	0	1	0.112249	0.112249	183	0	0	271.304	271.304	1	-0.999424	0	0	0	1	11
756		0.496123	0.535359	0.064356	0.559543	0.01797	1	0	1	0.130219	0.130219	184	0	0	302.863	302.863	1	-0.999564	0	0	0	1	11
757		0.498144	0.531632	0.0663767	0.555782	0.0160244	1	0	1	0.146244	0.146244	185	0	0	339.891	339.891	1	-0.999668	0	0	0	1	11
758		0.500304	0.527798	0.0685363	0.551912	0.0141977	1	0	1	0.160441	0.160441	186	0	0	151.359	151.359	1	-0.999748	0	0	0	1	11
759		0.502599	0.523855	0.0708319	0.547932	0.0124714	1	0	0.777778	0.172913	0.172913	187	0	0	171.111	171.111	1	-0.999809	0	0	0	1	11
760		0.505028	0.519802	0.0732603	0.543841	0.010827	1	0	0.555556	0.18374	0.18374	188	0	0	727.755	727.755	1	-0.999857	0	0	0	1	11
761		0.507585	0.515636	0.0758177	0.539637	0.00925262	1	0	0.555556	0.192992	0.192992	189	0	0	895.99	0	0	-0.999895	0	0	0	1	11
762		0.510267	0.511357	0.0784999	0.535318	0.208833	1	0	0.555556	0.401825	0.401825	190	0	0	1151.53	0	0	-0.994262	0	0	0	1	11
763		0.514522	0.506963	0.0827549	0.530882	-0.0160183	0	1	0.555556	0.385807	0.385807	191	0	0	1588.03	0	0	-0.993983	0	0	0	1	11
764		0.518753	0.50245	0.0869861	0.526327	-0.204523	0	1	0.555556	0.181284	0.181284	192	0	0	2505.11	0	0	-0.996637	0	0	0	1	11
765		0.521582	0.497816	0.0898151	0.521651	0.00500776	1	0	0.333333	0.186291	0.186291	193	0	0	5659.67	0	0	-0.993349	0	0	0	1	11
766		0.524519	0.49306	0.0927521	0.51685	0.00358145	1	0	0.111111	0.189873	0.189873	194	0	0	26872.1	0	0	-0.995862	0	0	0	0	11
767		0.527558	0.488179	0.0957909	0.511923	0.00220531	1	0	-0.111111	0.192078	0.192078	195	0	0	235.604	0	0	-0.999989	0	0	0	0	11
768		0.530692	0.483168	0.0989251	0.506866	0.000889776	1	0	-0.111111	0.192968	0.192968	196	0	0	250.316	0	0	-0.999996	0	0	0	0	11
769		0.533915	0.478027	0.102148	0.501677	-0.000351195	0	1	-0.111111	0.192617	0.192617	197	0	0	94482.1	0	0	-0.999999	0	0	0	0	11
770		0.53722	0.47275	0.105453	0.496351	-0.00149381	0	1	-0.333333	0.191123	0.191123	198	0	0	4707.61	0	0	-1	0	0	0	1	11
771		0.5406	0.467336	0.108833	0.490886	-0.00253681	0	1	-0.555556	0.188586	0.188586	199	0	0	2498.93	0	0	-0.999998	0	0	0	1	11
772		0.544048	0.46178	0.112281	0.485279	-0.003486	0	1	-0.777778	0.1851	0.1851	200	0	0	1743.41	0	0	-0.999994	0	0	0	1	11
773		0.547559	0.45608	0.115791	0.479525	-0.00434822	0	1	-1	0.180752	0.180752	201	0	0	1364.85	0	0	-0.999989	0	0	0	1	11
774		0.551126	0.450231	0.119358	0.473622	-0.00513259	0	1	-1	0.175619	0.175619	202	0	0	1139.19	0	0	-0.999983	0	0	0	1	11
775		0.554743	0.444231	0.122976	0.467565	-0.00585108	0	1	-1	0.169768	0.169768	203	0	0	990.17	0	0	-0.999976	0	0	0	1	11
776		0.558405	0.438074	0.126638	0.461352	-0.00650714	0	1	-1	0.163261	0.163261	204	0	0	884.893	0	0	-0.999969	0	0	0	1	11
777		0.562106	0.431758	0.130339	0.454977	-0.00710314	0	1	-1	0.156158	0.156158	205	0	0	806.879	806.879	1	-0.999961	0	0	0	1	11
778		0.565841	0.425279	0.134074	0.448438	-0.0076428	0	1	-1	0.148515	0.148515	206	0	0	746.96	746.96	1	-0.999953	0	0	0	1	11
779		0.569604	0.418633	0.137837	0.44173	-0.00813098	0	1	-1	0.140384	0.140384	207	0	0	699.648	699.648	1	-0.999944	0	0	0	1	11
780		0.573391	0.411817	0.141624	0.43485	-0.00857324	0	1	-1	0.131811	0.131811	208	0	0	661.491	661.491	1	-0.999936	0	0	0	1	11
781		0.577196	0.404826	0.145429	0.427794	-0.00897538	0	1	-1	0.122835	0.122835	209	0	0	630.163	630.163	1	-0.999927	0	0	0	1	11
782		0.581014	0.397658	0.149247	0.420559	-0.00934293	0	1	-1	0.113493	0.113493	210	0	0	604.035	604.035	1	-0.999918	0	0	0	1	11
783		0.584841	0.390308	0.153074	0.41314	-0.00968085	0	1	-1	0.103812	0.103812	211	0	0	581.947	581.947	1	-0.999909	0	0	0	1	11
784		0.588672	0.382774	0.156904	0.405536	-0.0099932	0	1	-1	0.0938185	0.0938185	212	0	0	563.07	563.07	1	-0.9999	0	0	0	1	11
785		0.5925	0.375051	0.160733	0.397741	-0.0102829	0	1	-1	0.0835356	0.0835356	213	0	0	546.819	546.819	1	-0.99989	0	0	0	1	11
786		0.596322	0.367138	0.164555	0.389754	-0.0105517	0	1	-1	0.0729839	0.0729839	214	0	0	532.802	532.802	1	-0.99988	0	0	0	1	11
787		0.600132	0.35903	0.168365	0.381571	-0.0107997	0	1	-1	0.0621843	0.0621843	215	0	0	520.783	520.783	1	-0.999869	0	0	0	1	11
788		0.603925	0.350725	0.172158	0.373189	-0.0110253	0	1	-1	0.0511589	0.0511589	216	0	0	510.645	510.645	1	-0.999858	0	0	0	1	11
789		0.607696	0.342221	0.175929	0.364605	-0.011225	0	1	-1	0.039934	0.039934	217	0	0	502.375	502.375	1	-0.999846	0	0	0	1	11
790		0.611439	0.333515	0.179672	0.355818	-0.0113924	0	1	-1	0.0285416	0.0285416	218	0	0	496.031	496.031	1	-0.999834	0	0	0	1	11
791		0.61515	0.324605	0.183382	0.346825	-0.0115192	0	1	-1	0.0170224	0.0170224	219	0	0	491.73	491.73	1	-0.999822	0	0	0	1	11
792		0.618822	0.315489	0.187055	0.337624	-0.011596	0	1	-1	0.00542642	0.00542642	220	0	0	489.628	489.628	1	-0.999809	0	0	0	1	11
793		0.622453	0.306166	0.190685	0.328214	-0.011613	0	1	-1	-0.00618654	0.00618654	221	0	0	489.905	489.905	1	-0.999797	0	0	0	1	11
794		0.626037	0.296633	0.194269	0.318592	-0.0115619	0	1	-1	-0.0177484	0.0177484	222	0	0	492.757	492.757	1	-0.999786	0	0	0	1	11
795		0.629571	0.286891	0.197803	0.308759	-0.0114375	0	1	-1	-0.0291859	0.0291859	223	0	0	498.385	498.385	1	-0.999776	0	0	0	1	11
796		0.633052	0.276937	0.201285	0.298713	-0.0112383	0	1	-1	-0.0404242	0.0404242	224	0	0	506.984	506.984	1	-0.999768	0	0	0	1	11
797		0.636479	0.266773	0.204711	0.288454	-0.0109673	0	1	-1	-0.0513916	0.0513916	225	0	0	518.73	518.73	1	-0.999763	0	0	0	1	11
798		0.639849	0.256397	0.208082	0.277981	-0.0106314	0	1	-1	-0.062023	0.062023	226	0	0	533.754	533.754	1	-0.999761	0	0	0	1	11
799		0.643164	0.245809	0.211396	0.267294	-0.0102411	0	1	-1	-0.0722641	0.0722641	227	0	0	552.103	552.103	1	-0.999761	0	0	0	1	11
800		0.646422	0.23501	0.214655	0.256395	-0.00980941	0	1	-0.777778	-0.0820735	0.0820735	228	0	0	604.067	604.067	1	-0.999765	0	0	0	1	11
801		0.649626	0.224001	0.217858	0.245283	-0.00935202	0	1	-0.555556	-0.0914255	0.0914255	229	0	0	521.868	521.868	1	-0.99977	0	0	0	1	11
802		0.652776	0.212782	0.221008	0.23396	-0.00888673	0	1	-0.333333	-0.100312	0.100312	230	0	0	458.544	458.544	1	-0.999778	0	0	0	1	11
803		0.655874	0.201356	0.224107	0.222427	-0.00843379	0	1	-0.111111	-0.108746	0.108746	231	0	0	407.904	0	0	-0.999787	0	0	0	0	11
804		0.658923	0.189723	0.227155	0.210685	0.16273	1	0	0.111111	0.0539836	0.0539836	232	0	0	366.084	0	0	-0.993565	0	0	0	0	11
805		0.664212	0.177885	0.232444	0.198738	0.00186174	1	0	0.333333	0.0558453	0.0558453	233	0	0	330.546	330.546	1	-0.991205	0	0	0	1	11
806		0.669618	0.165846	0.237851	0.186586	0.0023273	1	0	0.555556	0.0581726	0.0581726	234	0	0	299.561	299.561	1	-0.995996	0	0	0	1	11
807		0.675148	0.153608	0.243381	0.174234	0.00297065	1	0	0.555556	0.0611433	0.0611433	235	0	0	5397.71	0	0	-0.999993	0	0	0	1	11
808		0.680812	0.141173	0.249044	0.161683	0.00382893	1	0	0.555556	0.0649722	0.0649722	236	0	0	8144.32	0	0	-0.999988	0	0	0	1	11
809		0.686622	0.128546	0.254855	0.148938	0.00494528	1	0	0.333333	0.0699175	0.0699175	237	0	0	289.188	289.188	1	-0.999981	0	0	0	1	11
810		0.692597	0.115729	0.260829	0.136002	0.0063691	1	0	0.111111	0.0762866	0.0762866	238	0	0	279.1	0	0	-0.999969	0	0	0	0	11
811		0.698759	0.102729	0.266992	0.12288	-0.185906	0	1	-0.111111	-0.10962	0.10962	239	0	0	117.557	0	0	-0.995367	0	0	0	0	11
812		0.702201	0.0895476	0.270433	0.109577	-0.00529484	0	1	-0.333333	-0.114915	0.114915	240	0	0	112.469	112.469	1	-0.988302	0	0	0	1	11
813		0.705612	0.0761913	0.273845	0.0960958	-0.00482974	0	1	-0.555556	-0.119744	0.119744	241	0	0	107.986	107.986	1	-0.989461	0	0	0	1	11
814		0.708997	0.0626648	0.27723	0.0824432	-0.00441753	0	1	-0.555556	-0.124162	0.124162	242	0	0	216.489	216.489	1	-0.999926	0	0	0	1	11
815		0.712358	0.0489736	0.280591	0.0686244	-0.245034	0	1	-0.777778	-0.369196	0.369196	243	0	0	208.344	208.344	1	-0.966389	0	0	0	1	11
816		0.712268	0.0351236	0.280501	0.0546453	-0.0163614	0	1	-0.777778	-0.385558	0.385558	244	0	0	869.694	0	0	-0.855077	0	0	0	1	11
817		0.711946	0.0211207	0.280179	0.0405119	-0.0147158	0	1	-0.777778	-0.400273	0.400273	245	0	0	915.067	0	0	-0.496566	0	0	0	1	11
818		0.71141	0.00697127	0.279643	0.0262305	0.238124	1	0	-0.555556	-0.16215	0.16215	246	0	0	255.839	255.839	1	-0.446124	0	0	0	1	11
819		0.714343	-0.00731811	0.282576	0.011808	-0.00270403	0	1	-0.333333	-0.164854	0.164854	247	0	0	237.893	237.893	1	-0.817194	0	0	0	1	11
820		0.717262	-0.0217407	0.285495	-0.00274899	-0.00253376	0	1	-0.111111	-0.167387	0.167387	248	0	0	107.757	0	0	-0.9567	0	0	0	0	11
821		0.720168	-0.0362893	0.288401	-0.0174333	-0.00243045	0	1	0.111111	-0.169818	0.169818	249	0	0	102.084	0	0	-0.999969	0	0	0	0	11
822		0.723061	-0.050957	0.291293	-0.0322376	0.246447	1	0	0.333333	0.0766292	0.0766292	250	0	0	97.3904	97.3904	1	-0.977486	0	0	0	1	11
823		0.730072	-0.0657362	0.298305	-0.0471546	0.0103962	1	0	0.333333	0.0870254	0.0870254	251	0	0	175.596	175.596	1	-0.976588	0	0	0	1	11
824		0.737325	-0.0806194	0.305558	-0.0621766	0.0100136	1	0	0.555556	0.097039	0.097039	252	0	0	169.453	169.453	1	-0.990663	0	0	0	1	11
825		0.744812	-0.095599	0.313045	-0.0772958	0.00954864	1	0	0.777778	0.106588	0.106588	253	0	0	164.229	164.229	1	-0.999888	0	0	0	1	11
826		0.752525	-0.110667	0.320758	-0.0925043	0.00900091	1	0	1	0.115589	0.115589	254	0	0	159.782	159.782	1	-0.999901	0	0	0	1	11
827		0.760453	-0.125816	0.328686	-0.107794	0.00837259	1	0	1	0.123961	0.123961	255	0	0	686.078	686.078	1	-0.999915	0	0	0	1	11
828		0.768583	-0.141037	0.336816	-0.123157	0.00766791	1	0	1	0.131629	0.131629	256	0	0	746.953	746.953	1	-0.999928	0	0	0	1	11
829		0.7769	-0.156323	0.345132	-0.138585	0.00689837	1	0	1	0.138527	0.138527	257	0	0	824.681	824.681	1	-0.999941	0	0	0	1	11
830		0.785385	-0.171664	0.353618	-0.15407	0.00608258	1	0	1	0.14461	0.14461	258	0	0	923.203	0	0	-0.999953	0	0	0	1	11
831		0.79402	-0.187054	0.362253	-0.169603	0.0052471	1	0	1	0.149857	0.149857	259	0	0	1045.69	0	0	-0.999964	0	0	0	1	11
832		0.802785	-0.202484	0.371018	-0.185177	0.00442823	1	0	0.777778	0.154285	0.154285	260	0	0	173.531	173.531	1	-0.999973	0	0	0	1	11
833		0.811659	-0.217944	0.379892	-0.200781	0.0036742	1	0	0.555556	0.15796	0.15796	261	0	0	165.176	165.176	1	-0.999981	0	0	0	1	11
834		0.820622	-0.233428	0.388855	-0.21641	0.00304734	1	0	0.333333	0.161007	0.161007	262	0	0	157.974	157.974	1	-0.999987	0	0	0	1	11
835		0.829657	-0.248927	0.39789	-0.232053	0.00262649	1	0	0.111111	0.163633	0.163633	263	0	0	151.754	0	0	-0.999991	0	0	0	0	11
836		0.838751	-0.264432	0.406984	-0.247702	-0.329188	0	1	-0.111111	-0.165555	0.165555	264	0	0	146.375	0	0	-0.988984	0	0	0	0	11
837		0.841877	-0.279935	0.41011	-0.26335	-0.006976	0	1	-0.333333	-0.172531	0.172531	265	0	0	141.716	141.716	1	-0.967534	0	0	0	1	11
838		0.844889	-0.295428	0.413121	-0.278987	-0.00696903	0	1	-0.555556	-0.1795	0.1795	266	0	0	137.661	137.661	1	-0.960546	0	0	0	1	11
839		0.847784	-0.310903	0.416016	-0.294606	-0.00695282	0	1	-0.777778	-0.186453	0.186453	267	0	0	134.095	134.095	1	-0.999745	0	0	0	1	11
840		0.850562	-0.326352	0.418794	-0.310199	-0.0069173	0	1	-1	-0.19337	0.19337	268	0	0	130.899	130.899	1	-0.999727	0	0	0	1	11
841		0.853223	-0.341766	0.421455	-0.325757	-0.00685688	0	1	-1	-0.200227	0.200227	269	0	0	823.754	823.754	1	-0.999709	0	0	0	1	11
842		0.855767	-0.357139	0.424	-0.341273	-0.00676955	0	1	-1	-0.206996	0.206996	270	0	0	834.245	834.245	1	-0.999691	0	0	0	1	11
843		0.858196	-0.372462	0.426429	-0.356739	-0.00665658	0	1	-1	-0.213653	0.213653	271	0	0	847.08	847.08	1	-0.999674	0	0	0	1	11
844		0.860511	-0.387728	0.428743	-0.372148	-0.00652171	0	1	-1	-0.220175	0.220175	272	0	0	861.942	0	0	-0.999657	0	0	0	1	11
845		0.862713	-0.402929	0.430946	-0.387491	-0.00636917	0	1	-1	-0.226544	0.226544	273	0	0	878.029	0	0	-0.999641	0	0	0	1	11
846		0.864807	-0.418059	0.433039	-0.402762	-0.00620909	0	1	-1	-0.232753	0.232753	274	0	0	894.09	0	0	-0.999626	0	0	0	1	11
847		0.866793	-0.43311	0.435025	-0.417953	-0.00605655	0	1	-1	-0.238809	0.238809	275	0	0	908.593	0	0	-0.999611	0	0	0	1	11
848		0.868675	-0.448076	0.436907	-0.433058	-0.00593014	0	1	-1	-0.24474	0.24474	276	0	0	919.913	0	0	-0.999593	0	0	0	1	11
849		0.870455	-0.462949	0.438688	-0.44807	-0.00584936	0	1	-1	-0.250589	0.250589	277	0	0	926.573	0	0	-0.99957	0	0	0	1	11
850		0.872135	-0.477723	0.440367	-0.462982	-0.00582903	0	1	-1	-0.256418	0.256418	278	0	0	927.435	0	0	-0.999538	0	0	0	1	11
851		0.873715	-0.492393	0.441948	-0.477788	-0.00587267	0	1	-1	-0.262291	0.262291	279	0	0	921.932	0	0	-0.999492	0	0	0	1	11
852		0.875197	-0.506952	0.443429	-0.492483	-0.00597614	0	1	-1	-0.268267	0.268267	280	0	0	910.208	0	0	-0.999425	0	0	0	1	11
853		0.876578	-0.521395	0.444811	-0.50706	-0.00612914	0	1	-1	-0.274396	0.274396	281	0	0	893.096	0	0	-0.999332	0	0	0	1	11
854		0.877859	-0.535715	0.446092	-0.521515	-0.00631879	0	1	-1	-0.280715	0.280715	282	0	0	871.933	0	0	-0.999204	0	0	0	1	11
855		0.879037	-0.549909	0.44727	-0.53584	-0.00653242	0	1	-1	-0.287247	0.287247	283	0	0	848.317	848.317	1	-0.999028	0	0	0	1	11
856		0.880111	-0.56397	0.448344	-0.550032	-0.00675851	0	1	-1	-0.294006	0.294006	284	0	0	823.75	823.75	1	-0.998789	0	0	0	1	11
857		0.881079	-0.577893	0.449312	-0.564086	-0.00698771	0	1	-1	-0.300993	0.300993	285	0	0	799.407	799.407	1	-0.998458	0	0	0	1	11
858		0.881939	-0.591675	0.450172	-0.577996	-0.00721467	0	1	-1	-0.308208	0.308208	286	0	0	776.088	776.088	1	-0.997992	0	0	0	1	11
859		0.882691	-0.605311	0.450924	-0.591758	-0.0074331	0	1	-1	-0.315641	0.315641	287	0	0	754.177	754.177	1	-0.997312	0	0	0	1	11
860		0.883333	-0.618796	0.451565	-0.605369	-0.00763889	0	1	-1	-0.32328	0.32328	288	0	0	733.591	733.591	1	-0.996279	0	0	0	1	11
861		0.883864	-0.632126	0.452097	-0.618824	-0.00783337	0	1	-0.777778	-0.331113	0.331113	289	0	0	166.83	166.83	1	-0.994606	0	0	0	1	11
862		0.884285	-0.645298	0.452518	-0.632118	-0.00801744	0	1	-0.777778	-0.339131	0.339131	290	0	0	172.013	172.013	1	-0.991645	0	0	0	1	11
863		0.884596	-0.658308	0.452828	-0.645249	-0.00819952	0	1	-0.777778	-0.34733	0.34733	291	0	0	178.448	178.448	1	-0.985666	0	0	0	1	11
864		0.884796	-0.671151	0.453028	-0.658213	-0.00840178	0	1	-0.777778	-0.355732	0.355732	292	0	0	186.213	186.213	1	-0.970705	0	0	0	1	11
865		0.884886	-0.683826	0.453118	-0.671005	0.362872	1	0	-0.777778	0.00713977	0.00713977	293	0	0	195.312	195.312	1	-0.767946	0	0	0	1	11
866		0.889779	-0.696328	0.458011	-0.683624	-0.0160626	0	1	-0.777778	-0.00892283	0.00892283	294	0	0	375.27	375.27	1	-0.893496	0	0	0	1	11
867		0.894374	-0.708653	0.462607	-0.696064	-0.0177473	0	1	-0.777778	-0.0266701	0.0266701	295	0	0	367.637	367.637	1	-0.971912	0	0	0	1	11
868		0.898657	-0.7208	0.46689	-0.708324	-0.0191726	0	1	-0.777778	-0.0458427	0.0458427	296	0	0	360.637	360.637	1	-0.999462	0	0	0	1	11
869		0.902617	-0.732764	0.47085	-0.7204	-0.0202077	0	1	-0.777778	-0.0660504	0.0660504	297	0	0	354.093	354.093	1	-0.999314	0	0	0	1	11
870		0.906252	-0.744543	0.474485	-0.732288	-0.39894	0	1	-1	-0.46499	0.46499	298	0	0	97.3786	97.3786	1	-0.94089	0	0	0	1	11
871		0.905052	-0.756134	0.473285	-0.743987	-0.0107972	0	1	-1	-0.475787	0.475787	299	0	0	98.2619	98.2619	1	-0.690715	0	0	0	1	11
872		0.903746	-0.767533	0.471979	-0.755493	-0.0108519	0	1	-1	-0.486639	0.486639	300	0	0	99.4288	99.4288	1	0.285193	0	0	0	1	11
873		0.902338	-0.778738	0.470571	-0.766802	-0.0109766	0	1	-1	-0.497616	0.497616	301	0	0	100.832	100.832	1	0.998497	0	0	0	1	11
874		0.900831	-0.789746	0.469063	-0.777913	-0.0111689	0	1	-1	-0.508785	0.508785	302	0	0	102.391	102.391	1	0.998707	0	0	0	1	11
875		0.899226	-0.800554	0.467459	-0.788822	-0.0114247	0	1	-1	-0.520209	0.520209	303	0	0	478.847	478.847	1	0.99886	0	0	0	1	11
876		0.897527	-0.81116	0.46576	-0.799526	-0.0117467	0	1	-1	-0.531956	0.531956	304	0	0	465.24	465.24	1	0.998974	0	0	0	1	11
877		0.895734	-0.821559	0.463967	-0.810023	-0.0121418	0	1	-1	-0.544098	0.544098	305	0	0	449.457	449.457	1	0.999059	0	0	0	1	11
878		0.893848	-0.83175	0.462081	-0.820308	-0.0126192	0	1	-1	-0.556717	0.556717	306	0	0	431.883	431.883	1	0.999123	0	0	0	1	11
879		0.89187	-0.841729	0.460102	-0.83038	-0.0131917	0	1	-1	-0.569909	0.569909	307	0	0	412.938	412.938	1	0.999168	0	0	0	1	11
880		0.889799	-0.851494	0.458031	-0.840236	-0.0138659	0	1	-1	-0.583775	0.583775	308	0	0	393.044	393.044	1	0.999199	0	0	0	1	11
881		0.887634	-0.86104	0.455866	-0.849872	-0.0146439	0	1	-1	-0.598419	0.598419	309	0	0	372.618	372.618	1	0.999218	0	0	0	1	11
882		0.885374	-0.870366	0.453606	-0.859284	-0.015525	0	1	-1	-0.613944	0.613944	310	0	0	352.044	352.044	1	0.999227	0	0	0	1	11
883		0.883016	-0.879468	0.451249	-0.868471	-0.016506	0	1	-0.777778	-0.63045	0.63045	311	0	0	328.807	328.807	1	0.999228	0	0	0	1	11
884		0.880559	-0.888343	0.448792	-0.877429	-0.0175828	0	1	-0.777778	-0.648032	0.648032	312	0	0	401.762	401.762	1	0.999224	0	0	0	1	11
885		0.878001	-0.896988	0.446233	-0.886155	-0.0187535	0	1	-0.777778	-0.666786	0.666786	313	0	0	534.963	534.963	1	0.999215	0	0	0	1	11
886		0.875337	-0.9054	0.443569	-0.894645	-0.0200217	0	1	-0.777778	-0.686808	0.686808	314	0	0	845.064	845.064	1	0.999203	0	0	0	1	11
887		0.872565	-0.913575	0.440798	-0.902896	0.282885	1	0	-0.777778	-0.403922	0.403922	315	0	0	211.733	211.733	1	0.981822	0	0	0	1	11
888		0.872235	-0.921511	0.440468	-0.910906	-0.0409374	0	1	-0.777778	-0.44486	0.44486	316	0	0	201.168	201.168	1	0.94422	0	0	0	1	11
889		0.871596	-0.929205	0.439829	-0.918672	-0.045002	0	1	-0.777778	-0.489862	0.489862	317	0	0	191.1	191.1	1	0.935384	0	0	0	1	11
890		0.870636	-0.936653	0.438868	-0.926189	-0.0491058	0	1	-0.777778	-0.538967	0.538967	318	0	0	181.566	181.566	1	0.968602	0	0	0	1	11
891		0.869342	-0.943853	0.437575	-0.933456	-0.312257	0	1	-0.777778	-0.851224	0.851224	319	0	0	172.611	172.611	1	0.92679	0	0	0	1	11
892		0.865615	-0.950801	0.433848	-0.940469	-0.0289668	0	1	-1	-0.880191	0.880191	320	0	0	82.3463	82.3463	1	0.954771	0	0	0	1	11
893		0.86177	-0.957495	0.430002	-0.947226	-0.0307405	0	1	-1	-0.910931	0.910931	321	0	0	82.7604	82.7604	1	0.984546	0	0	0	1	11
894		0.857803	-0.963932	0.426036	-0.953722	-0.0325587	0	1	-1	-0.94349	0.94349	322	0	0	83.514	83.514	1	0.999137	0	0	0	1	11
895		0.853712	-0.970109	0.421944	-0.959957	-0.034377	0	1	-1	-0.977867	0.977867	323	0	0	84.6454	84.6454	1	0.999093	0	0	0	1	11
896		0.849494	-0.976024	0.417727	-0.965927	-0.0361613	0	1	-1	-1.01403	1.01403	324	0	0	155.173	155.173	1	0.999046	0	0	0	1	11
897		0.845148	-0.981673	0.41338	-0.971629	-0.0378846	0	1	-1	-1.05191	1.05191	325	0	0	148.38	148.38	1	0.998996	0	0	0	1	11
898		0.840672	-0.987055	0.408905	-0.977061	-0.0395249	0	1	-1	-1.09144	1.09144	326	0	0	142.401	142.401	1	0.998942	0	0	0	1	11
899		0.836067	-0.992167	0.4043	-0.982221	-0.0410644	0	1	-1	-1.1325	1.1325	327	0	0	137.177	137.177	1	0.998882	0	0	0	1	11
900		0.831333	-0.997007	0.399566	-0.987105	-0.0424893	0	1	-1	-1.17499	1.17499	328	0	0	132.64	132.64	1	0.998815	0	0	0	1	11
901		0.826471	-1.00157	0.394704	-0.991713	-0.0437893	0	1	-1	-1.21878	1.21878	329	0	0	145.402	145.402	1	0.998738	0	0	0	1	11
902		0.821483	-1.00586	0.389716	-0.996042	-0.0449582	0	1	-1	-1.26374	1.26374	330	0	0	129.972	129.972	1	0.998647	0	0	0	1	11
903		0.816372	-1.00987	0.384605	-1.00009	-0.0459945	0	1	-1	-1.30973	1.30973	331	0	0	119.368	119.368	1	0.998537	0	0	0	1	11
904		0.81114	-1.0136	0.379373	-1.00386	-0.0469028	0	1	-1	-1.35664	1.35664	332	0	0	112.158	112.158	1	0.998401	0	0	0	1	11
905		0.805791	-1.01705	0.374024	-1.00734	-0.00291656	0	1	-1	-1.35955	1.35955	333	0	0	107.457	107.457	1	0.999028	0	0	0	1	11
906		0.800849	-1.02022	0.369082	-1.01053	-0.0789058	0	1	-1	-1.43846	1.43846	334	0	0	104.705	104.705	1	0.99873	0	0	0	1	11
907		0.795462	-1.0231	0.363695	-1.01344	-0.0738623	0	1	-1	-1.51232	1.51232	335	0	0	103.543	103.543	1	0.996776	0	0	0	1	11
908		0.789613	-1.0257	0.357846	-1.01606	-0.0681213	0	1	-1	-1.58044	1.58044	336	0	0	103.749	103.749	1	0.993948	0	0	0	1	11
909		0.783285	-1.02801	0.351518	-1.01839	-0.0620843	0	1	-1	-1.64253	1.64253	337	0	0	105.198	105.198	1	0.993372	0	0	0	1	11
910		0.776465	-1.03003	0.344697	-1.02044	-0.0560788	0	1	-1	-1.69861	1.69861	338	0	0	98.3861	98.3861	1	0.992536	0	0	0	1	11
911		0.76914	-1.03177	0.337372	-1.02219	-0.0503433	0	1	-1	-1.74895	1.74895	339	0	0	108.272	108.272	1	0.991292	0	0	0	1	11
912		0.761302	-1.03322	0.329535	-1.02365	-0.0450323	0	1	-1	-1.79398	1.79398	340	0	0	119.828	119.828	1	0.989352	0	0	0	1	11
913		0.752947	-1.03438	0.321179	-1.02483	-0.0402325	0	1	-1	-1.83421	1.83421	341	0	0	133.05	133.05	1	0.986101	0	0	0	1	11
914		0.744073	-1.03526	0.312306	-1.02571	-0.0359808	0	1	-1	-1.87019	1.87019	342	0	0	147.859	147.859	1	0.980016	0	0	0	1	11
915		0.734686	-1.03585	0.302918	-1.02631	-0.0322805	0	1	-1	-1.90247	1.90247	343	0	0	152.57	152.57	1	0.966398	0	0	0	1	11
916		0.724796	-1.03615	0.293028	-1.02662	-0.0291146	0	1	-1	-1.93159	1.93159	344	0	0	161.999	161.999	1	0.924413	0	0	0	1	11
917		0.714419	-1.03617	0.282652	-1.02664	-0.0264547	0	1	-1	-1.95804	1.95804	345	0	0	169.843	169.843	1	0.675128	0	0	0	1	11
918		0.703581	-1.03591	0.271814	-1.02637	-0.0242666	0	1	-1	-1.98231	1.98231	346	0	0	175.767	175.767	1	-0.605537	0	0	0	1	11
919		0.692311	-1.03536	0.260544	-1.02582	-0.0455864	0	1	-1	-2.0279	2.0279	347	0	0	179.63	179.63	1	-0.915155	0	0	0	1	11
920		0.683511	-1.03454	0.251744	-1.02499	-0.0311778	0	1	-1	-2.05907	2.05907	348	0	0	181.487	181.487	1	-0.957246	0	0	0	1	11
921		0.674686	-1.03344	0.242918	-1.02387	-0.0307091	0	1	-1	-2.08978	2.08978	349	0	0	181.554	181.554	1	-0.976968	0	0	0	1	11
922		0.665845	-1.03206	0.234077	-1.02248	-0.0302629	0	1	-1	-2.12005	2.12005	350	0	0	180.148	180.148	1	-0.991568	0	0	0	1	11
923		0.656997	-1.0304	0.22523	-1.02081	-0.029834	0	1	-1	-2.14988	2.14988	351	0	0	177.629	177.629	1	-0.99437	0	0	0	1	11
924		0.648152	-1.02848	0.216385	-1.01887	-0.0294183	0	1	-1	-2.1793	2.1793	352	0	0	189.525	189.525	1	-0.995969	0	0	0	1	11
925		0.639318	-1.02628	0.20755	-1.01665	-0.0290125	0	1	-1	-2.20831	2.20831	353	0	0	192.233	192.233	1	-0.996964	0	0	0	1	11
926		0.630501	-1.02382	0.198734	-1.01417	-0.0286143	0	1	-1	-2.23693	2.23693	354	0	0	194.959	194.959	1	-0.997625	0	0	0	1	11
927		0.621711	-1.02109	0.189943	-1.01142	-0.0282216	0	1	-1	-2.26515	2.26515	355	0	0	197.724	197.724	1	-0.998085	0	0	0	1	11
928		0.612952	-1.01811	0.181184	-1.0084	-0.0278326	0	1	-1	-2.29298	2.29298	356	0	0	200.547	200.547	1	-0.998418	0	0	0	1	11
929		0.604231	-1.01486	0.172464	-1.00512	-0.0274449	0	1	-1	-2.32042	2.32042	357	0	0	203.45	203.45	1	-0.998667	0	0	0	1	11
930		0.595556	-1.01136	0.163788	-1.00159	-0.0270544	0	1	-1	-2.34748	2.34748	358	0	0	206.463	206.463	1	-0.998858	0	0	0	1	11
931		0.58693	-1.0076	0.155162	-0.997801	-0.0266596	0	1	-1	-2.37414	2.37414	359	0	0	82.2992	82.2992	1	-0.999007	0	0	0	1	11
932		0.578359	-1.0036	0.146592	-0.99376	-0.0262573	0	1	-1	-2.4004	2.4004	360	0	0	80.877	80.877	1	-0.999126	0	0	0	1	11
933		0.569849	-0.99935	0.138082	-0.989471	-0.0258427	0	1	-1	-2.42624	2.42624	361	0	0	79.9277	79.9277	1	-0.999223	0	0	0	1	11
934		0.561403	-0.994858	0.129636	-0.984937	-0.025409	0	1	-1	-2.45165	2.45165	362	0	0	79.3604	79.3604	1	-0.999304	0	0	0	1	11
935		0.553026	-0.990127	0.121258	-0.980161	-0.395733	0	1	-1	-2.84738	2.84738	363	0	0	79.1045	79.1045	1	-0.988905	0	0	0	1	11
936		0.549159	-0.98516	0.117392	-0.975148	-0.0389563	0	1	-1	-2.88634	2.88634	364	0	0	79.1051	79.1051	1	-0.974652	0	0	0	1	11
937		0.545429	-0.979961	0.113661	-0.969901	-0.0352105	0	1	-1	-2.92155	2.92155	365	0	0	79.3195	79.3195	1	-0.975307	0	0	0	1	11
938		0.541818	-0.974534	0.110051	-0.964423	-0.0319382	0	1	-1	-2.95349	2.95349	366	0	0	79.7134	79.7134	1	-0.998995	0	0	0	1	11
939		0.538314	-0.968882	0.106546	-0.958719	-0.0291027	0	1	-1	-2.98259	2.98259	367	0	0	80.2591	80.2591	1	-0.999125	0	0	0	1	11
940		0.534906	-0.96301	0.103139	-0.952792	-0.0266544	0	1	-1	-3.00924	3.00924	368	0	0	200.979	200.979	1	-0.999228	0	0	0	1	11
941		0.531588	-0.956921	0.0998203	-0.946646	-0.0245409	0	1	-1	-3.03378	3.03378	369	0	0	218.875	218.875	1	-0.999309	0	0	0	1	11
942		0.528352	-0.950619	0.0965847	-0.940285	-0.0227125	0	1	-1	-3.0565	3.0565	370	0	0	237.245	237.245	1	-0.999374	0	0	0	1	11
943		0.525195	-0.944108	0.0934277	-0.933714	-0.0211241	0	1	-1	-3.07762	3.07762	371	0	0	255.935	255.935	1	-0.999426	0	0	0	1	11
944		0.522113	-0.937393	0.0903459	-0.926936	-0.0197367	0	1	-1	-3.09736	3.09736	372	0	0	274.824	274.824	1	-0.999468	0	0	0	1	11
945		0.519104	-0.930477	0.0873367	-0.919955	-0.0185172	0	1	-1	-3.11587	3.11587	373	0	0	293.829	293.829	1	-0.999501	0	0	0	1	11
946		0.516166	-0.923364	0.0843983	-0.912776	-0.0174374	0	1	-1	-3.13331	3.13331	374	0	0	312.894	312.894	1	-0.999529	0	0	0	1	11
947		0.513297	-0.916058	0.0815294	-0.905402	-0.0164742	0	1	-1	-3.14979	3.14979	375	0	0	331.991	331.991	1	-0.99955	0	0	0	1	11
948		0.510496	-0.908564	0.078729	-0.897838	-0.0156103	0	1	-1	-3.1654	3.1654	376	0	0	351.113	351.113	1	-0.999568	0	0	0	1	11
949		0.507764	-0.900884	0.0759963	-0.890087	-0.0148306	0	1	-1	-3.18023	3.18023	377	0	0	370.266	370.266	1	-0.999582	0	0	0	1	11
950		0.505098	-0.893025	0.0733309	-0.882154	-0.0141226	0	1	-1	-3.19435	3.19435	378	0	0	389.461	389.461	1	-0.999593	0	0	0	1	11
951		0.5025	-0.884988	0.0707325	-0.874043	-0.0134761	0	1	-0.777778	-3.20783	3.20783	379	0	0	214.405	214.405	1	-0.999602	0	0	0	1	11
952		0.499968	-0.876778	0.0682008	-0.865756	-0.0128826	0	1	-0.777778	-3.22071	3.22071	380	0	0	210.756	210.756	1	-0.999609	0	0	0	1	11
953		0.497503	-0.8684	0.0657356	-0.8573	-0.0123354	0	1	-0.777778	-3.23304	3.23304	381	0	0	207.757	207.757	1	-0.999613	0	0	0	1	11
954		0.495104	-0.859856	0.0633368	-0.848677	-0.0118296	0	1	-0.777778	-3.24487	3.24487	382	0	0	205.283	205.283	1	-0.999616	0	0	0	1	11
955		0.492772	-0.851151	0.0610043	-0.83989	0.345884	1	0	-0.777778	-2.89899	2.89899	383	0	0	203.256	203.256	1	-0.974738	0	0	0	1	11
956		0.486581	-0.842289	0.0548137	-0.830945	-0.0124176	0	1	-0.777778	-2.91141	2.91141	384	0	0	201.627	201.627	1	-0.975739	0	0	0	1	11
957		0.480449	-0.833272	0.0486813	-0.821844	-0.0121683	0	1	-0.777778	-2.92358	2.92358	385	0	0	200.366	200.366	1	-0.99144	0	0	0	1	11
958		0.474376	-0.824105	0.0426091	-0.812592	-0.0119169	0	1	-0.777778	-2.93549	2.93549	386	0	0	199.46	199.46	1	-0.999878	0	0	0	1	11
959		0.468366	-0.814791	0.0365988	-0.803192	-0.0116823	0	1	-0.777778	-2.94717	2.94717	387	0	0	198.908	198.908	1	-0.999881	0	0	0	1	11
960		0.462419	-0.805335	0.030652	-0.793647	-0.0114783	0	1	-1	-2.95865	2.95865	388	0	0	481.121	481.121	1	-0.999883	0	0	0	1	11
961		0.456538	-0.795738	0.0247707	-0.783961	-0.0113142	0	1	-1	-2.96997	2.96997	389	0	0	486.983	486.983	1	-0.999884	0	0	0	1	11
962		0.450724	-0.786006	0.0189571	-0.774138	-0.0111969	0	1	-1	-2.98116	2.98116	390	0	0	491.312	491.312	1	-0.999885	0	0	0	1	11
963		0.444981	-0.776141	0.0132137	-0.764181	-0.0111305	0	1	-1	-2.99229	2.99229	391	0	0	493.739	493.739	1	-0.999884	0	0	0	1	11
964		0.439311	-0.766146	0.00754378	-0.754093	-0.0111178	0	1	-1	-3.00341	3.00341	392	0	0	494.022	494.022	1	-0.999882	0	0	0	1	11
965		0.433718	-0.756026	0.00195086	-0.743879	-0.0111606	0	1	-1	-3.01457	3.01457	393	0	0	492.04	492.04	1	-0.999879	0	0	0	1	11
966		0.428207	-0.745783	-0.0035608	-0.73354	-0.0112594	0	1	-1	-3.02583	3.02583	394	0	0	487.762	487.762	1	-0.999875	0	0	0	1	11
967		0.422781	-0.73542	-0.00898645	-0.723081	-0.0114142	0	1	-1	-3.03725	3.03725	395	0	0	481.258	481.258	1	-0.999869	0	0	0	1	11
968		0.417447	-0.724941	-0.0143207	-0.712504	-0.0116239	0	1	-1	-3.04887	3.04887	396	0	0	472.69	472.69	1	-0.999861	0	0	0	1	11
969		0.41221	-0.714349	-0.0195577	-0.701813	-0.011888	0	1	-1	-3.06076	3.06076	397	0	0	462.294	462.294	1	-0.999851	0	0	0	1	11
970		0.407077	-0.703646	-0.0246908	-0.69101	-0.0122098	0	1	-1	-3.07297	3.07297	398	0	0	450.361	450.361	1	-0.999838	0	0	0	1	11
971		0.402054	-0.692836	-0.0297131	-0.6801	-0.0125889	0	1	-1	-3.08556	3.08556	399	0	0	437.216	437.216	1	-0.999822	0	0	0	1	11
972		0.397151	-0.681922	-0.0346168	-0.669083	-0.0130227	0	1	-1	-3.09858	3.09858	400	0	0	423.208	423.208	1	-0.999803	0	0	0	1	11
973		0.392374	-0.670906	-0.0393937	-0.657965	-0.0135079	0	1	-1	-3.11209	3.11209	401	0	0	408.672	408.672	1	-0.999779	0	0	0	1	11
974		0.387732	-0.65979	-0.044035	-0.646746	-0.0140402	0	1	-1	-3.12613	3.12613	402	0	0	393.914	393.914	1	-0.99975	0	0	0	1	11
975		0.383236	-0.648579	-0.0485315	-0.63543	-0.0146134	0	1	-1	-3.14074	3.14074	403	0	0	379.218	379.218	1	-0.999715	0	0	0	1	11
976		0.378894	-0.637274	-0.0528736	-0.62402	-0.0152176	0	1	-1	-3.15596	3.15596	404	0	0	364.832	364.832	1	-0.999672	0	0	0	1	11
977		0.374716	-0.625878	-0.0570514	-0.612517	-0.0158464	0	1	-1	-3.17181	3.17181	405	0	0	350.959	350.959	1	-0.999619	0	0	0	1	11
978		0.370712	-0.614393	-0.0610551	-0.600925	-0.0164938	0	1	-1	-3.1883	3.1883	406	0	0	337.767	337.767	1	-0.999556	0	0	0	1	11
979		0.366893	-0.602822	-0.0648744	-0.589246	-0.0171523	0	1	-1	-3.20545	3.20545	407	0	0	325.386	325.386	1	-0.999477	0	0	0	1	11
980		0.363268	-0.591167	-0.0684993	-0.577482	-0.0178132	0	1	-1	-3.22326	3.22326	408	0	0	313.913	313.913	1	-0.99938	0	0	0	1	11
981		0.359847	-0.57943	-0.0719198	-0.565636	-0.0184659	0	1	-1	-3.24173	3.24173	409	0	0	303.414	303.414	1	-0.99926	0	0	0	1	11
982		0.356641	-0.567613	-0.0751262	-0.553709	-0.019099	0	1	-1	-3.26083	3.26083	410	0	0	293.932	293.932	1	-0.999108	0	0	0	1	11
983		0.353658	-0.555719	-0.0781089	-0.541704	-0.0196999	0	1	-1	-3.28053	3.28053	411	0	0	285.496	285.496	1	-0.998914	0	0	0	1	11
984		0.350908	-0.54375	-0.0808591	-0.529624	-0.0202561	0	1	-1	-3.30079	3.30079	412	0	0	278.12	278.12	1	-0.998662	0	0	0	1	11
985		0.348399	-0.531707	-0.0833683	-0.517469	-0.0207557	0	1	-1	-3.32154	3.32154	413	0	0	271.809	271.809	1	-0.99833	0	0	0	1	11
986		0.346138	-0.519593	-0.0856289	-0.505241	-0.021188	0	1	-1	-3.34273	3.34273	414	0	0	266.558	266.558	1	-0.997881	0	0	0	1	11
987		0.344133	-0.507409	-0.087634	-0.492944	-0.0215446	0	1	-1	-3.36427	3.36427	415	0	0	262.355	262.355	1	-0.997252	0	0	0	1	11
988		0.34239	-0.495157	-0.0893777	-0.480578	-0.021819	0	1	-1	-3.38609	3.38609	416	0	0	259.185	259.185	1	-0.996336	0	0	0	1	11
989		0.340912	-0.48284	-0.0908549	-0.468146	-0.0220073	0	1	-1	-3.4081	3.4081	417	0	0	257.031	257.031	1	-0.994928	0	0	0	1	11
990		0.339706	-0.470458	-0.0920616	-0.455648	-0.0221072	0	1	-1	-3.43021	3.43021	418	0	0	255.878	255.878	1	-0.992593	0	0	0	1	11
991		0.338773	-0.458013	-0.0929947	-0.443087	-0.0221185	0	1	-1	-3.45233	3.45233	419	0	0	255.718	255.718	1	-0.988297	0	0	0	1	11
992		0.338115	-0.445507	-0.0936521	-0.430465	-0.0220422	0	1	-1	-3.47437	3.47437	420	0	0	256.547	256.547	1	-0.979023	0	0	0	1	11
993		0.337735	-0.432941	-0.0940326	-0.417782	-0.0218805	0	1	-1	-3.49625	3.49625	421	0	0	258.375	258.375	1	-0.952797	0	0	0	1	11
994		0.337631	-0.420317	-0.094136	-0.40504	-0.021636	0	1	-1	-3.51788	3.51788	422	0	0	261.223	261.223	1	-0.826593	0	0	0	1	11
995		0.337804	-0.407636	-0.0939628	-0.392241	-0.0213114	0	1	-1	-3.5392	3.5392	423	0	0	265.129	265.129	1	0.208815	0	0	0	1	11
996		0.338252	-0.394899	-0.0935148	-0.379386	-0.0209095	0	1	-1	-3.56011	3.56011	424	0	0	270.149	270.149	1	0.886768	0	0	0	1	11
997		0.338973	-0.382109	-0.0927944	-0.366476	-0.0204336	0	1	-1	-3.58054	3.58054	425	0	0	276.363	276.363	1	0.964587	0	0	0	1	11
998		0.339962	-0.369265	-0.091805	-0.353513	-0.0198872	0	1	-1	-3.60043	3.60043	426	0	0	283.878	283.878	1	0.983525	0	0	0	1	11
999		0.341217	-0.35637	-0.0905507	-0.340497	-0.0192739	0	1	-1	-3.6197	3.6197	427	0	0	292.837	292.837	1	0.990705	0	0	0	1	11
1000		0.34273	-0.343424	-0.089037	-0.327431	-0.0185972	0	1	-1	-3.6383	3.6383	428	0	0	303.42	303.42	1	0.994144	0	0	0	1	11
1001		0.344498	-0.33043	-0.0872697	-0.314315	-0.0178607	0	1	-1	-3.65616	3.65616	429	0	0	315.855	315.855	1	0.996044	0	0	0	1	11
1002		0.346511	-0.317387	-0.0852558	-0.301151	-0.0170678	0	1	-1	-3.67323	3.67323	430	0	0	330.42	330.42	1	0.9972	0	0	0	1	11
1003		0.348764	-0.304297	-0.0830034	-0.287939	-0.0162218	0	1	-1	-3.68945	3.68945	431	0	0	347.451	347.451	1	0.997953	0	0	0	1	11
1004		0.351246	-0.291162	-0.0805212	-0.274682	-0.0153272	0	1	-1	-3.70477	3.70477	432	0	0	367.35	367.35	1	0.998469	0	0	0	1	11
1005		0.353948	-0.277983	-0.0778189	-0.26138	-0.0143907	0	1	-1	-3.71917	3.71917	433	0	0	390.603	390.603	1	0.998838	0	0	0	1	11
1006		0.35686	-0.26476	-0.0749073	-0.248034	-0.0134223	0	1	-1	-3.73259	3.73259	434	0	0	417.795	417.795	1	0.999109	0	0	0	1	11
1007		0.35997	-0.251496	-0.0717976	-0.234646	-0.0124345	0	1	-1	-3.74502	3.74502	435	0	0	449.632	449.632	1	0.999313	0	0	0	1	11
1008		0.363265	-0.238191	-0.0685019	-0.221217	-0.0114411	0	1	-1	-3.75646	3.75646	436	0	0	486.966	486.966	1	0.999469	0	0	0	1	11
1009		0.366735	-0.224847	-0.0650326	-0.207749	-0.0104556	0	1	-1	-3.76692	3.76692	437	0	0	530.823	530.823	1	0.99959	0	0	0	1	11
1010		0.370365	-0.211465	-0.0614025	-0.194242	-0.00948958	0	1	-1	-3.77641	3.77641	438	0	0	582.438	582.438	1	0.999683	0	0	0	1	11
1011		0.374143	-0.198046	-0.0576242	-0.180698	-0.00855329	0	1	-1	-3.78496	3.78496	439	0	0	643.302	643.302	1	0.999756	0	0	0	1	11
1012		0.378057	-0.184592	-0.0537106	-0.167119	-0.00765534	0	1	-1	-3.79262	3.79262	440	0	0	715.229	715.229	1	0.999813	0	0	0	1	11
1013		0.382093	-0.171105	-0.0496739	-0.153505	-0.00680322	0	1	-1	-3.79942	3.79942	441	0	0	800.427	800.427	1	0.999858	0	0	0	1	11
1014		0.386241	-0.157584	-0.0455263	-0.139859	-0.00600334	0	1	-1	-3.80542	3.80542	442	0	0	901.591	0	0	0.999892	0	0	0	1	11
1015		0.390488	-0.144033	-0.0412793	-0.126181	-0.00526112	0	1	-1	-3.81068	3.81068	443	0	0	1022	0	0	0.999919	0	0	0	1	11
1016		0.394824	-0.130451	-0.0369437	-0.112473	-0.00458065	0	1	-1	-3.81527	3.81527	444	0	0	1165.64	0	0	0.99994	0	0	0	1	11
1017		0.399237	-0.116842	-0.0325298	-0.0987365	-0.0039644	0	1	-1	-3.81923	3.81923	445	0	0	1337.25	0	0	0.999956	0	0	0	1	11
1018		0.40372	-0.103205	-0.028047	-0.0849729	-0.00341279	0	1	-1	-3.82264	3.82264	446	0	0	1542.39	0	0	0.999968	0	0	0	1	11
1019		0.408264	-0.0895434	-0.0235036	-0.0711837	-0.00292426	0	1	-1	-3.82557	3.82557	447	0	0	1787.29	0	0	0.999976	0	0	0	1	11
1020		0.41286	-0.0758575	-0.0189075	-0.0573703	-0.00249584	0	1	-1	-3.82806	3.82806	448	0	0	2078.29	0	0	0.999983	0	0	0	1	11
1021		0.417502	-0.0621492	-0.0142654	-0.0435342	-0.00212414	0	1	-1	-3.83019	3.83019	449	0	0	2420.69	0	0	0.999988	0	0	0	1	11
1022		0.422184	-0.0484199	-0.00958345	-0.029677	-0.00180623	0	1	-1	-3.83199	3.83199	450	0	0	2816.32	0	0	0.999991	0	0	0	1	11
1023		0.4269	-0.0346713	-0.00486697	-0.0158002	-0.00154021	0	1	-1	-3.83353	3.83353	451	0	0	3259.41	0	0	0.999994	0	0	0	1	11
1024		0.431647	-0.0209049	-0.000120499	-0.00190547	-0.00132525	0	1	-1	-3.83486	3.83486	452	0	0	3730.47	0	0	0.999995	0	0	0	1	11
1025		0.436419	-0.00712239	0.00465213	0.0120055	-0.00116134	0	1	-1	-3.83602	3.83602	453	0	0	4190.33	0	0	0.999997	0	0	0	1	11
1026		0.441215	0.0066746	0.00944784	0.0259311	-0.00104881	0	1	-1	-3.83707	3.83707	454	0	0	4579.3	0	0	0.999997	0	0	0	1	11
1027		0.446032	0.0204843	0.0142643	0.0398696	-0.000987784	0	1	-1	-3.83806	3.83806	455	0	0	4829.28	0	0	0.999998	0	0	0	1	11
1028		0.450867	0.034305	0.0191001	0.053819	-0.00097787	0	1	-1	-3.83903	3.83903	456	0	0	4889.74	0	0	0.999998	0	0	0	1	11
1029		0.455722	0.0481348	0.0239543	0.0677777	-0.00101788	0	1	-1	-3.84005	3.84005	457	0	0	4753.33	0	0	0.999998	0	0	0	1	11
1030		0.460594	0.0619718	0.028827	0.0817437	-0.00110573	0	1	-1	-3.84116	3.84116	458	0	0	4459.97	0	0	0.999998	0	0	0	1	11
1031		0.465486	0.0758141	0.0337189	0.095715	-0.00123833	0	1	-1	-3.8424	3.8424	459	0	0	4074.83	0	0	0.999998	0	0	0	1	11
1032		0.470399	0.0896597	0.0386314	0.10969	-0.00141159	0	1	-1	-3.84381	3.84381	460	0	0	3660.62	0	0	0.999997	0	0	0	1	11
1033		0.475334	0.103507	0.0435666	0.123666	-0.0016201	0	1	-1	-3.84543	3.84543	461	0	0	3261.72	0	0	0.999996	0	0	0	1	11
1034		0.480294	0.117352	0.0485269	0.137641	-0.00185657	0	1	-1	-3.84728	3.84728	462	0	0	2902.41	0	0	0.999995	0	0	0	1	11
1035		0.485283	0.131195	0.0535153	0.151613	-0.00211349	0	1	-1	-3.8494	3.8494	463	0	0	2592.07	0	0	0.999994	0	0	0	1	11
1036		0.490302	0.145033	0.0585351	0.165579	-0.00238291	0	1	-1	-3.85178	3.85178	464	0	0	2331.39	0	0	0.999992	0	0	0	1	11
1037		0.495357	0.158863	0.0635898	0.179538	-0.00265634	0	1	-0.777778	-3.85444	3.85444	465	0	0	311.346	311.346	1	0.99999	0	0	0	1	11
1038		0.50045	0.172683	0.0686828	0.193487	-0.00292472	0	1	-0.777778	-3.85736	3.85736	466	0	0	324.168	324.168	1	0.999988	0	0	0	1	11
1039		0.505585	0.186491	0.0738174	0.207423	-0.00317818	0	1	-0.777778	-3.86054	3.86054	467	0	0	340.827	340.827	1	0.999986	0	0	0	1	11
1040		0.510764	0.200283	0.0789968	0.221345	-0.00340549	0	1	-0.777778	-3.86395	3.86395	468	0	0	361.332	361.332	1	0.999983	0	0	0	1	11
1041		0.515991	0.214059	0.0842236	0.235248	0.181502	1	0	-0.777778	-3.68244	3.68244	469	0	0	385.812	385.812	1	0.993592	0	0	0	1	11
1042		0.51849	0.227814	0.0867224	0.249131	-0.00800271	0	1	-0.777778	-3.69045	3.69045	470	0	0	414.498	414.498	1	0.98431	0	0	0	1	11
1043		0.521099	0.241545	0.0893318	0.262991	-0.00943196	0	1	-0.777778	-3.69988	3.69988	471	0	0	447.726	447.726	1	0.98698	0	0	0	1	11
1044		0.523839	0.255252	0.0920715	0.276825	-0.0104785	0	1	-0.777778	-3.71036	3.71036	472	0	0	485.951	485.951	1	0.999563	0	0	0	1	11
1045		0.526724	0.268929	0.0949562	0.29063	-0.011205	0	1	-0.777778	-3.72156	3.72156	473	0	0	529.794	529.794	1	0.999507	0	0	0	1	11
1046		0.529763	0.282574	0.0979956	0.304403	-0.0116684	0	1	-1	-3.73323	3.73323	474	0	0	217.852	217.852	1	0.999487	0	0	0	1	11
1047		0.532963	0.296185	0.101196	0.31814	-0.0119201	0	1	-1	-3.74515	3.74515	475	0	0	219.411	219.411	1	0.999494	0	0	0	1	11
1048		0.536327	0.309758	0.10456	0.331839	-0.0120047	0	1	-1	-3.75715	3.75715	476	0	0	222.455	222.455	1	0.999519	0	0	0	1	11
1049		0.539855	0.323289	0.108088	0.345497	-0.0119612	0	1	-1	-3.76912	3.76912	477	0	0	226.74	226.74	1	0.999554	0	0	0	1	11
1050		0.543546	0.336777	0.111779	0.35911	-0.143942	0	1	-1	-3.91306	3.91306	478	0	0	232.085	232.085	1	0.992459	0	0	0	1	11
1051		0.549421	0.350216	0.117653	0.372675	-0.0063647	0	1	-1	-3.91942	3.91942	479	0	0	238.358	238.358	1	0.991518	0	0	0	1	11
1052		0.555376	0.363605	0.123608	0.386188	-0.00629816	0	1	-0.777778	-3.92572	3.92572	480	0	0	674.386	674.386	1	0.996329	0	0	0	1	11
1053		0.561408	0.376939	0.12964	0.399647	-0.00621048	0	1	-0.777778	-3.93193	3.93193	481	0	0	697.869	697.869	1	0.99995	0	0	0	1	11
1054		0.567514	0.390216	0.135747	0.413047	-0.00610222	0	1	-0.777778	-3.93803	3.93803	482	0	0	731.474	731.474	1	0.999952	0	0	0	1	11
1055		0.573691	0.403431	0.141924	0.426386	-0.00597205	0	1	-0.777778	-3.94401	3.94401	483	0	0	746.705	746.705	1	0.999955	0	0	0	1	11
1056		0.579934	0.416582	0.148167	0.43966	0.124358	1	0	-0.777778	-3.81965	3.81965	484	0	0	758.849	758.849	1	0.99815	0	0	0	1	11
1057		0.584242	0.429666	0.152474	0.452865	-0.00949782	0	1	-0.777778	-3.82915	3.82915	485	0	0	767.29	767.29	1	0.996074	0	0	0	1	11
1058		0.588664	0.442679	0.156897	0.465999	-0.00865396	0	1	-0.777778	-3.8378	3.8378	486	0	0	773.228	773.228	1	0.997415	0	0	0	1	11
1059		0.593187	0.455618	0.16142	0.479059	-0.00797668	0	1	-0.777778	-3.84578	3.84578	487	0	0	777.819	777.819	1	0.999858	0	0	0	1	11
1060		0.5978	0.468479	0.166033	0.49204	-0.00744142	0	1	-0.777778	-3.85322	3.85322	488	0	0	782.153	782.153	1	0.999885	0	0	0	1	11
1061		0.602492	0.48126	0.170725	0.50494	-0.00702652	0	1	-1	-3.86024	3.86024	489	0	0	757.09	757.09	1	0.999903	0	0	0	1	11
1062		0.607256	0.493957	0.175489	0.517756	-0.00671329	0	1	-1	-3.86696	3.86696	490	0	0	796.839	796.839	1	0.999917	0	0	0	1	11
1063		0.612085	0.506568	0.180317	0.530484	-0.00648572	0	1	-1	-3.87344	3.87344	491	0	0	829.347	829.347	1	0.999927	0	0	0	1	11
1064		0.616973	0.51909	0.185206	0.543122	-0.00632998	0	1	-1	-3.87977	3.87977	492	0	0	854.237	0	0	0.999934	0	0	0	1	11
1065		0.621918	0.531519	0.19015	0.555668	-0.00623394	0	1	-1	-3.88601	3.88601	493	0	0	871.622	0	0	0.999939	0	0	0	1	11
1066		0.626914	0.543854	0.195147	0.568117	-0.00618764	0	1	-1	-3.89219	3.89219	494	0	0	291.178	291.178	1	0.999942	0	0	0	1	11
1067		0.63196	0.556092	0.200193	0.580469	-0.00618262	0	1	-1	-3.89838	3.89838	495	0	0	291.097	291.097	1	0.999944	0	0	0	1	11
1068		0.637054	0.56823	0.205286	0.592721	-0.00621162	0	1	-1	-3.90459	3.90459	496	0	0	290.698	290.698	1	0.999946	0	0	0	1	11
1069		0.642194	0.580267	0.210426	0.60487	-0.00626836	0	1	-1	-3.91086	3.91086	497	0	0	290.072	290.072	1	0.999947	0	0	0	1	11
1070		0.647378	0.5922	0.215611	0.616914	-0.121928	0	1	-1	-4.03278	4.03278	498	0	0	289.286	289.286	1	0.997432	0	0	0	1	11
1071		0.654348	0.604028	0.222581	0.628853	-0.00676081	0	1	-1	-4.03955	4.03955	499	0	0	288.392	288.392	1	0.996404	0	0	0	1	11
1072		0.661362	0.615749	0.229595	0.640683	-0.00672263	0	1	-1	-4.04627	4.04627	500	0	0	287.426	287.426	1	0.998178	0	0	0	1	11
1073		0.668419	0.627362	0.236651	0.652404	-0.00670303	0	1	-1	-4.05297	4.05297	501	0	0	286.414	286.414	1	0.999959	0	0	0	1	11
1074		0.675515	0.638865	0.243747	0.664014	-0.00670439	0	1	-1	-4.05968	4.05968	502	0	0	285.373	285.373	1	0.99996	0	0	0	1	11
1075		0.682649	0.650257	0.250882	0.675513	-0.00672639	0	1	-1	-4.0664	4.0664	503	0	0	821.852	821.852	1	0.99996	0	0	0	1	11
1076		0.68982	0.661538	0.258052	0.686898	-0.00676812	0	1	-1	-4.07317	4.07317	504	0	0	816.986	816.986	1	0.999961	0	0	0	1	11
1077		0.697026	0.672706	0.265258	0.69817	-0.00682897	0	1	-1	-4.08	4.08	505	0	0	809.881	809.881	1	0.999961	0	0	0	1	11
1078		0.704267	0.68376	0.272499	0.709328	-0.00690868	0	1	-1	-4.08691	4.08691	506	0	0	800.636	800.636	1	0.999961	0	0	0	1	11
1079		0.711542	0.694702	0.279775	0.720371	-0.00700725	0	1	-1	-4.09391	4.09391	507	0	0	789.403	789.403	1	0.99996	0	0	0	1	11
1080		0.718852	0.705529	0.287085	0.731299	-0.0071249	0	1	-1	-4.10104	4.10104	508	0	0	776.354	776.354	1	0.999959	0	0	0	1	11
1081		0.726197	0.716242	0.29443	0.742112	-0.00726208	0	1	-1	-4.1083	4.1083	509	0	0	761.673	761.673	1	0.999959	0	0	0	1	11
1082		0.733578	0.726841	0.301811	0.75281	-0.00741937	0	1	-1	-4.11572	4.11572	510	0	0	745.58	745.58	1	0.999957	0	0	0	1	11
1083		0.740996	0.737327	0.309229	0.763394	-0.00759727	0	1	-1	-4.12332	4.12332	511	0	0	728.372	728.372	1	0.999956	0	0	0	1	11
1084		0.748454	0.747699	0.316686	0.773862	-0.00779609	0	1	-1	-4.13111	4.13111	512	0	0	710.479	710.479	1	0.999954	0	0	0	1	11
1085		0.755952	0.757958	0.324185	0.784217	-0.00801543	0	1	-0.777778	-4.13913	4.13913	513	0	0	1381.27	0	0	0.999953	0	0	0	1	11
1086		0.763494	0.768105	0.331727	0.794458	-0.00825268	0	1	-0.777778	-4.14738	4.14738	514	0	0	864.767	0	0	0.99995	0	0	0	1	11
1087		0.771083	0.77814	0.339316	0.804587	-0.00850065	0	1	-0.777778	-4.15588	4.15588	515	0	0	627.336	627.336	1	0.999948	0	0	0	1	11
1088		0.778722	0.788064	0.346955	0.814604	-0.00874438	0	1	-0.777778	-4.16463	4.16463	516	0	0	494.018	494.018	1	0.999945	0	0	0	1	11
1089		0.786415	0.797879	0.354647	0.82451	0.0272157	1	0	-0.777778	-4.13741	4.13741	517	0	0	410.363	410.363	1	0.999967	0	0	0	1	11
1090		0.793603	0.807585	0.361836	0.834307	-0.0289864	0	1	-0.777778	-4.1664	4.1664	518	0	0	395.083	395.083	1	0.999965	0	0	0	1	11
1091		0.801154	0.817183	0.369387	0.843994	-0.0294074	0	1	-0.777778	-4.19581	4.19581	519	0	0	389.727	389.727	1	0.999795	0	0	0	1	11
1092		0.809084	0.826675	0.377317	0.853575	-0.0292094	0	1	-0.777778	-4.22502	4.22502	520	0	0	385.568	385.568	1	0.999372	0	0	0	1	11
1093		0.817405	0.836062	0.385638	0.86305	-0.0285274	0	1	-0.777778	-4.25354	4.25354	521	0	0	382.518	382.518	1	0.999393	0	0	0	1	11
1094		0.82612	0.845346	0.394353	0.87242	-0.0127505	0	1	-1	-4.26629	4.26629	522	0	0	298.619	298.619	1	0.999583	0	0	0	1	11
1095		0.834962	0.854527	0.403195	0.881686	-0.0100004	0	1	-1	-4.27629	4.27629	523	0	0	337.509	337.509	1	0.999804	0	0	0	1	11
1096		0.843883	0.863607	0.412116	0.890851	-0.00989098	0	1	-1	-4.28618	4.28618	524	0	0	389.507	389.507	1	0.999919	0	0	0	1	11
1097		0.852883	0.872588	0.421116	0.899916	-0.00978346	0	1	-1	-4.29597	4.29597	525	0	0	459.788	459.788	1	0.999931	0	0	0	1	11
1098		0.861961	0.881471	0.430194	0.908881	-0.00968498	0	1	-1	-4.30565	4.30565	526	0	0	556.894	556.894	1	0.999933	0	0	0	1	11
1099		0.871116	0.890258	0.439349	0.91775	-0.00960062	0	1	-1	-4.31525	4.31525	527	0	0	577.853	577.853	1	0.999934	0	0	0	1	11
1100		0.880347	0.898949	0.44858	0.926522	-0.00953588	0	1	-1	-4.32479	4.32479	528	0	0	581.166	581.166	1	0.999935	0	0	0	1	11
1101		0.889656	0.907547	0.457888	0.9352	-0.00949349	0	1	-1	-4.33428	4.33428	529	0	0	583.46	583.46	1	0.999936	0	0	0	1	11
1102		0.899041	0.916052	0.467274	0.943785	-0.00947437	0	1	-1	-4.34376	4.34376	530	0	0	584.611	584.611	1	0.999936	0	0	0	1	11
1103		0.908505	0.924467	0.476738	0.952278	-0.00947843	0	1	-1	-4.35324	4.35324	531	0	0	584.568	584.568	1	0.999936	0	0	0	1	11
1104		0.918048	0.932792	0.486281	0.960681	-0.00950469	0	1	-1	-4.36274	4.36274	532	0	0	583.35	583.35	1	0.999936	0	0	0	1	11
1105		0.927674	0.941029	0.495906	0.968994	-0.00955107	0	1	-1	-4.37229	4.37229	533	0	0	581.047	581.047	1	0.999935	0	0	0	1	11
1106		0.937383	0.949179	0.505616	0.97722	-0.00961402	0	1	-1	-4.38191	4.38191	534	0	0	577.81	577.81	1	0.999934	0	0	0	1	11
1107		0.94718	0.957243	0.515412	0.985359	-0.00969123	0	1	-1	-4.3916	4.3916	535	0	0	573.831	573.831	1	0.999933	0	0	0	1	11
1108		0.957066	0.965222	0.525299	0.993413	-0.0097801	0	1	-1	-4.40138	4.40138	536	0	0	569.336	569.336	1	0.999932	0	0	0	1	11
1109		0.967047	0.973117	0.535279	1.00138	-0.00987713	0	1	-1	-4.41125	4.41125	537	0	0	564.579	564.579	1	0.99993	0	0	0	1	11
1110		0.977125	0.980929	0.545358	1.00927	-0.00997794	0	1	-1	-4.42123	4.42123	538	0	0	559.824	559.824	1	0.999928	0	0	0	1	11
1111		0.987305	0.988659	0.555538	1.01707	-0.0100774	0	1	-1	-4.43131	4.43131	539	0	0	555.33	555.33	1	0.999926	0	0	0	1	11
1112		0.997591	0.996307	0.565823	1.02479	-0.0101696	0	1	-0.777778	-4.44148	4.44148	540	0	0	641.835	641.835	1	0.999923	0	0	0	1	11
1113		1.00799	1.00388	0.576219	1.03243	-0.0102482	0	1	-0.555556	-4.45173	4.45173	541	0	0	570.189	570.189	1	0.999921	0	0	0	1	11
1114		1.0185	1.01136	0.586728	1.03998	-0.0103069	0	1	-0.555556	-4.46203	4.46203	542	0	0	519.364	519.364	1	0.999919	0	0	0	1	11
1115		1.02912	1.01877	0.597355	1.04746	-0.0103403	0	1	-0.555556	-4.47237	4.47237	543	0	0	484.79	484.79	1	0.999917	0	0	0	1	11
1116		1.03987	1.0261	0.608103	1.05486	0.159053	1	0	-0.555556	-4.31332	4.31332	544	0	0	646.083	646.083	1	0.99861	0	0	0	1	11
1117		1.04754	1.03335	0.615773	1.06217	5.53624e-05	1	0	-0.555556	-4.31327	4.31327	545	0	0	633.573	633.573	1	0.996649	0	0	0	1	11
1118		1.05513	1.04052	0.623358	1.06941	-0.00125444	0	1	-0.555556	-4.31452	4.31452	546	0	0	621.792	621.792	1	0.99741	0	0	0	1	11
1119		1.06265	1.04761	0.630879	1.07657	-0.00307925	0	1	-0.555556	-4.3176	4.3176	547	0	0	610.753	610.753	1	0.999998	0	0	0	1	11
1120		1.07013	1.05462	0.638362	1.08365	-0.191471	0	1	-0.555556	-4.50907	4.50907	548	0	0	600.403	600.403	1	0.995992	0	0	0	1	11
1121		1.08114	1.06155	0.649372	1.09064	-0.011705	0	1	-0.777778	-4.52078	4.52078	549	0	0	197.44	197.44	1	0.9941	0	0	0	1	11
1122		1.09231	1.06841	0.660543	1.09756	-0.0117507	0	1	-1	-4.53253	4.53253	550	0	0	188.737	188.737	1	0.996919	0	0	0	1	11
1123		1.10364	1.07518	0.671877	1.10439	-0.0117673	0	1	-1	-4.54429	4.54429	551	0	0	181.667	181.667	1	0.999878	0	0	0	1	11
1124		1.11515	1.08187	0.683379	1.11115	-0.0117583	0	1	-1	-4.55605	4.55605	552	0	0	176.275	176.275	1	0.999875	0	0	0	1	11
1125		1.12682	1.08847	0.695051	1.11781	-0.0117272	0	1	-1	-4.56778	4.56778	553	0	0	478.504	478.504	1	0.999871	0	0	0	1	11
1126		1.13866	1.095	0.706896	1.1244	-0.0116779	0	1	-1	-4.57946	4.57946	554	0	0	480.069	480.069	1	0.999869	0	0	0	1	11
1127		1.15068	1.10144	0.718915	1.1309	-0.0116141	0	1	-1	-4.59107	4.59107	555	0	0	482.306	482.306	1	0.999866	0	0	0	1	11
1128		1.16288	1.10779	0.731109	1.13731	-0.0115388	0	1	-1	-4.60261	4.60261	556	0	0	485.127	485.127	1	0.999863	0	0	0	1	11
1129		1.17525	1.11405	0.743478	1.14363	-0.0114545	0	1	-1	-4.61406	4.61406	557	0	0	488.457	488.457	1	0.999861	0	0	0	1	11
1130		1.18779	1.12023	0.756022	1.14986	-0.0113629	0	1	-1	-4.62543	4.62543	558	0	0	492.246	492.246	1	0.999858	0	0	0	1	11
1131		1.20051	1.12631	0.76874	1.156	-0.0112652	0	1	-1	-4.63669	4.63669	559	0	0	496.467	496.467	1	0.999855	0	0	0	1	11
1132		1.2134	1.1323	0.78163	1.16205	-0.0111617	0	1	-1	-4.64785	4.64785	560	0	0	501.13	501.13	1	0.999853	0	0	0	1	11
1133		1.22646	1.13819	0.79469	1.168	-0.0110522	0	1	-0.777778	-4.65891	4.65891	561	0	0	1342.72	0	0	0.99985	0	0	0	1	11
1134		1.23968	1.14398	0.807916	1.17384	-0.0109356	0	1	-0.777778	-4.66984	4.66984	562	0	0	1527.63	0	0	0.999847	0	0	0	1	11
1135		1.25307	1.14968	0.821305	1.17959	-0.01081	0	1	-0.777778	-4.68065	4.68065	563	0	0	1746.89	0	0	0.999844	0	0	0	1	11
1136		1.26662	1.15526	0.834851	1.18523	-0.0106725	0	1	-0.777778	-4.69132	4.69132	564	0	0	518.001	518.001	1	0.999841	0	0	0	1	11
1137		1.28032	1.16075	0.848549	1.19076	0.126131	1	0	-0.777778	-4.56519	4.56519	565	0	0	522.881	522.881	1	0.998739	0	0	0	1	11
1138		1.29001	1.16612	0.858242	1.19618	-0.0159835	0	1	-0.777778	-4.58118	4.58118	566	0	0	527.922	527.922	1	0.997185	0	0	0	1	11
1139		1.29987	1.17138	0.868098	1.20149	-0.0154909	0	1	-0.777778	-4.59667	4.59667	567	0	0	533.014	533.014	1	0.998114	0	0	0	1	11
1140		1.30987	1.17652	0.878107	1.20668	-0.137013	0	1	-0.777778	-4.73368	4.73368	568	0	0	538.033	538.033	1	0.995463	0	0	0	1	11
1141		1.32415	1.18154	0.892378	1.21175	-0.0102564	0	1	-0.777778	-4.74394	4.74394	569	0	0	331.142	331.142	1	0.99402	0	0	0	1	11
1142		1.33854	1.18645	0.90677	1.2167	-0.0101347	0	1	-1	-4.75407	4.75407	570	0	0	177.137	177.137	1	0.996917	0	0	0	1	11
1143		1.35304	1.19123	0.921274	1.22152	-0.0100265	0	1	-1	-4.7641	4.7641	571	0	0	184.108	184.108	1	0.999805	0	0	0	1	11
1144		1.36765	1.19588	0.935879	1.22622	-0.00993066	0	1	-1	-4.77403	4.77403	572	0	0	191.622	191.622	1	0.999798	0	0	0	1	11
1145		1.38234	1.2004	0.950573	1.23078	-0.069013	0	1	-1	-4.84304	4.84304	573	0	0	387.681	387.681	1	0.997601	0	0	0	1	11
1146		1.40108	1.20479	0.96931	1.23521	-0.00577412	0	1	-1	-4.84882	4.84882	574	0	0	406.881	406.881	1	0.996715	0	0	0	1	11
1147		1.41971	1.20904	0.987946	1.2395	-0.00524365	0	1	-1	-4.85406	4.85406	575	0	0	428.33	428.33	1	0.998235	0	0	0	1	11
1148		1.43818	1.21315	1.00641	1.24365	-0.00479059	0	1	-1	-4.85885	4.85885	576	0	0	452.12	452.12	1	0.999897	0	0	0	1	11
1149		1.45642	1.21712	1.02465	1.24766	-0.00442168	0	1	-1	-4.86327	4.86327	577	0	0	478.284	478.284	1	0.99991	0	0	0	1	11
1150		1.47436	1.22095	1.0426	1.25152	-0.00414107	0	1	-1	-4.86741	4.86741	578	0	0	1256.81	0	0	0.99992	0	0	0	1	11
1151		1.49197	1.22462	1.0602	1.25523	-0.00395146	0	1	-1	-4.87136	4.87136	579	0	0	1310.55	0	0	0.999927	0	0	0	1	11
1152		1.50919	1.22815	1.07743	1.25879	-0.00385465	0	1	-1	-4.87522	4.87522	580	0	0	1339.21	0	0	0.999931	0	0	0	1	11
1153		1.52599	1.23152	1.09423	1.2622	-0.00385207	0	1	-1	-4.87907	4.87907	581	0	0	1338.45	0	0	0.999932	0	0	0	1	11
1154		1.54234	1.23474	1.11057	1.26544	-0.00394501	0	1	-1	-4.88302	4.88302	582	0	0	1307.75	0	0	0.99993	0	0	0	1	11
1155		1.55821	1.2378	1.12644	1.26853	-0.0041349	0	1	-1	-4.88715	4.88715	583	0	0	1250.57	0	0	0.999923	0	0	0	1	11
1156		1.57358	1.2407	1.14181	1.27146	-0.00442331	0	1	-1	-4.89157	4.89157	584	0	0	1173.19	0	0	0.999912	0	0	0	1	11
1157		1.58844	1.24343	1.15667	1.27421	-0.00481192	0	1	-1	-4.89639	4.89639	585	0	0	1261.77	0	0	0.999896	0	0	0	1	11
1158		1.60278	1.246	1.17101	1.27681	-0.00530261	0	1	-1	-4.90169	4.90169	586	0	0	1160.4	0	0	0.99987	0	0	0	1	11
1159		1.6166	1.2484	1.18483	1.27923	-0.00589784	0	1	-1	-4.90759	4.90759	587	0	0	896.422	0	0	0.999834	0	0	0	1	11
1160		1.62989	1.25063	1.19813	1.28148	-0.00660093	0	1	-1	-4.91419	4.91419	588	0	0	700.556	700.556	1	0.999782	0	0	0	1	11
1161		1.64268	1.25268	1.21091	1.28355	-0.000848383	0	1	-1	-4.91504	4.91504	589	0	0	615.671	615.671	1	0.999842	0	0	0	1	11
1162		1.65444	1.25456	1.22267	1.28545	-0.00733034	0	1	-1	-4.92237	4.92237	590	0	0	548.343	548.343	1	0.999866	0	0	0	1	11
1163		1.66561	1.25627	1.23384	1.28717	-0.0166948	0	1	-1	-4.93906	4.93906	591	0	0	494.058	494.058	1	0.999446	0	0	0	1	11
1164		1.67686	1.2578	1.2451	1.28871	-0.0198044	0	1	-1	-4.95887	4.95887	592	0	0	449.708	449.708	1	0.997917	0	0	0	1	11
1165		1.6885	1.25914	1.25673	1.29007	-0.0143108	0	1	-1	-4.97318	4.97318	593	0	0	413.097	413.097	1	0.996673	0	0	0	1	11
1166		1.7	1.26031	1.26823	1.29125	-0.0148314	0	1	-1	-4.98801	4.98801	594	0	0	364.413	364.413	1	0.996323	0	0	0	1	11
1167		1.71134	1.26129	1.27958	1.29224	-0.0153696	0	1	-1	-5.00338	5.00338	595	0	0	338.905	338.905	1	0.99568	0	0	0	1	11
1168		1.72254	1.26209	1.29077	1.29305	-0.0159265	0	1	-1	-5.0193	5.0193	596	0	0	335.195	335.195	1	0.993478	0	0	0	1	11
1169		1.73359	1.2627	1.30182	1.29366	-0.016502	0	1	-1	-5.03581	5.03581	597	0	0	337.045	337.045	1	0.989251	0	0	0	1	11
1170		1.74448	1.26312	1.31272	1.29409	-0.0170958	0	1	-1	-5.0529	5.0529	598	0	0	325.401	325.401	1	0.979639	0	0	0	1	11
1171		1.75522	1.26336	1.32345	1.29433	-0.0177071	0	1	-1	-5.07061	5.07061	599	0	0	314.214	314.214	1	0.950382	0	0	0	1	11
1172		1.7658	1.26341	1.33404	1.29438	-0.0183356	0	1	-1	-5.08894	5.08894	600	0	0	303.462	303.462	1	0.790546	0	0	0	1	11
1173		1.77623	1.26327	1.34446	1.29424	-0.0189813	0	1	-1	-5.10793	5.10793	601	0	0	293.123	293.123	1	-0.382365	0	0	0	1	11
1174		1.78649	1.26293	1.35472	1.2939	-0.019645	0	1	-1	-5.12757	5.12757	602	0	0	323.83	323.83	1	-0.89959	0	0	0	1	11
1175		1.79658	1.26241	1.36482	1.29337	-0.0203284	0	1	-1	-5.1479	5.1479	603	0	0	325.448	325.448	1	-0.964412	0	0	0	1	11
1176		1.80651	1.26169	1.37475	1.29265	-0.0210342	0	1	-1	-5.16893	5.16893	604	0	0	272.588	272.588	1	-0.981848	0	0	0	1	11
1177		1.81627	1.26078	1.38451	1.29173	-0.0217661	0	1	-1	-5.1907	5.1907	605	0	0	264.278	264.278	1	-0.988869	0	0	0	1	11
1178		1.82586	1.25968	1.39409	1.29061	-0.000249467	0	1	-1	-5.19095	5.19095	606	0	0	256.236	256.236	1	-0.995556	0	0	0	1	11
1179		1.8371	1.25838	1.40534	1.28931	-0.0163247	0	1	-1	-5.20727	5.20727	607	0	0	248.459	248.459	1	-0.998318	0	0	0	1	11
1180		1.84841	1.2569	1.41664	1.2878	-0.0476429	0	1	-1	-5.25492	5.25492	608	0	0	240.951	240.951	1	-0.995776	0	0	0	1	11
1181		1.85775	1.25521	1.42598	1.28611	-0.0241306	0	1	-1	-5.27905	5.27905	609	0	0	233.725	233.725	1	-0.992412	0	0	0	1	11
1182		1.86689	1.25334	1.43513	1.28422	-0.0249476	0	1	-1	-5.30399	5.30399	610	0	0	226.803	226.803	1	-0.994079	0	0	0	1	11
1183		1.87584	1.25127	1.44408	1.28213	-0.0257826	0	1	-1	-5.32978	5.32978	611	0	0	200.622	200.622	1	-0.997527	0	0	0	1	11
1184		1.88459	1.24902	1.45283	1.27985	-0.0266294	0	1	-1	-5.35641	5.35641	612	0	0	190.259	190.259	1	-0.99785	0	0	0	1	11
1185		1.89314	1.24657	1.46137	1.27739	-0.0274804	0	1	-1	-5.38389	5.38389	613	0	0	203.269	203.269	1	-0.998098	0	0	0	1	11
1186		1.90148	1.24394	1.46971	1.27473	-0.028326	0	1	-1	-5.41221	5.41221	614	0	0	197.397	197.397	1	-0.998294	0	0	0	1	11
1187		1.9096	1.24112	1.47783	1.27188	-0.0291571	0	1	-1	-5.44137	5.44137	615	0	0	86.4972	86.4972	1	-0.998451	0	0	0	1	11
1188		1.91751	1.23811	1.48574	1.26885	-0.0299649	0	1	-1	-5.47133	5.47133	616	0	0	77.6915	77.6915	1	-0.998578	0	0	0	1	11
1189		1.9252	1.23493	1.49343	1.26563	-0.0307417	0	1	-1	-5.50208	5.50208	617	0	0	70.3482	70.3482	1	-0.998683	0	0	0	1	11
1190		1.93267	1.23156	1.5009	1.26223	-0.0314823	0	1	-1	-5.53356	5.53356	618	0	0	64.3153	64.3153	1	-0.99877	0	0	0	1	11
1191		1.93991	1.22802	1.50815	1.25866	-0.351264	0	1	-1	-5.88482	5.88482	619	0	0	59.4289	59.4289	1	-0.989143	0	0	0	1	11
1192		1.94349	1.2243	1.51172	1.25491	-0.0916143	0	1	-1	-5.97644	5.97644	620	0	0	55.5251	55.5251	1	-0.974561	0	0	0	1	11
1193		1.94659	1.22042	1.51482	1.25099	-0.094131	0	1	-1	-6.07057	6.07057	621	0	0	52.4492	52.4492	1	-0.970518	0	0	0	1	11
1194		1.94924	1.21637	1.51747	1.2469	-0.0944707	0	1	-1	-6.16504	6.16504	622	0	0	50.0623	50.0623	1	-0.993161	0	0	0	1	11
1195		1.95146	1.21215	1.51969	1.24265	-0.0925542	0	1	-1	-6.25759	6.25759	623	623	1	48.2452	48.2452	1	-0.991863	0	0	0	1	11
1196		1.95326	1.20779	1.5215	1.23824	-0.0885935	0	1	-1	-6.34619	0.0661863	0	0	0	66.7929	66.7929	1	-0.989892	0	0	0	1	11
1197		1.95467	1.20327	1.52291	1.23367	-0.0830286	0	1	-1	-6.42921	0.149215	1	0	0	70.1936	70.1936	1	-0.986678	0	0	0	1	11
1198		1.95571	1.1986	1.52394	1.22896	-0.0764104	0	1	-1	-6.50563	0.225625	2	0	0	74.9477	74.9477	1	-0.980842	0	0	0	1	11
1199		1.9564	1.19379	1.52463	1.22411	-0.069281	0	1	-1	-6.57491	0.294906	3	0	0	81.1979	81.1979	1	-0.968303	0	0	0	1	11
1200		1.95675	1.18885	1.52498	1.21912	-0.0620926	0	1	-1	-6.637	0.356999	4	0	0	89.1069	89.1069	1	-0.932103	0	0	0	1	11
1201		1.9568	1.18378	1.52503	1.214	-0.0551732	0	1	-1	-6.69217	0.412172	5	0	0	98.8512	98.8512	1	-0.741906	0	0	0	1	11
1202		1.95655	1.17858	1.52479	1.20876	-0.0487301	0	1	-1	-6.7409	0.460902	6	0	0	110.616	110.616	1	0.479221	0	0	0	1	11
1203		1.95604	1.17327	1.52428	1.2034	-0.0428718	0	1	-1	-6.78377	0.503774	7	0	0	124.593	124.593	1	0.923539	0	0	0	1	11
1204		1.95528	1.16785	1.52352	1.19793	-0.0376361	0	1	-0.777778	-6.82141	0.54141	8	0	0	136.313	136.313	1	0.976252	0	0	0	1	11
1205		1.9543	1.16233	1.52253	1.19236	-0.0330148	0	1	-0.777778	-6.85442	0.574425	9	0	0	124.08	124.08	1	0.989568	0	0	0	1	11
1206		1.9531	1.15671	1.52133	1.18669	-0.0289728	0	1	-0.777778	-6.8834	0.603398	10	0	0	115.576	115.576	1	0.994534	0	0	0	1	11
1207		1.9517	1.15101	1.51994	1.18093	-0.0254618	0	1	-0.777778	-6.90886	0.628859	11	0	0	109.619	109.619	1	0.996817	0	0	0	1	11
1208		1.95013	1.14522	1.51836	1.17509	0.702517	1	0	-0.777778	-6.20634	6.20634	12	0	0	105.488	105.488	1	0.568857	0	0	0	1	11
1209		1.95291	1.13936	1.52115	1.16918	-0.0257558	0	1	-0.777778	-6.2321	6.2321	13	0	0	102.73	102.73	1	-0.489981	0	0	0	1	11
1210		1.95554	1.13344	1.52377	1.1632	-0.0253826	0	1	-0.777778	-6.25748	6.25748	14	14	1	101.049	101.049	1	-0.91136	0	0	0	1	11
1211		1.95801	1.12746	1.52624	1.15716	-0.0251056	0	1	-0.777778	-6.28259	0.00258694	0	0	0	100.254	100.254	1	-0.999127	0	0	0	1	11
1212		1.96032	1.12143	1.52855	1.15108	-0.0249258	0	1	-0.777778	-6.30751	0.0275127	1	0	0	255.086	255.086	1	-0.999054	0	0	0	1	11
1213		1.96248	1.11537	1.53071	1.14496	-0.0248474	0	1	-1	-6.33236	0.0523601	2	0	0	54.3623	54.3623	1	-0.998956	0	0	0	1	11
1214		1.96447	1.10927	1.5327	1.1388	-0.0248788	0	1	-0.777778	-6.35724	0.0772389	3	0	0	217.433	217.433	1	-0.998826	0	0	0	1	11
1215		1.96631	1.10315	1.53454	1.13263	-0.0250311	0	1	-0.777778	-6.38227	0.10227	4	0	0	216.236	216.236	1	-0.99865	0	0	0	1	11
1216		1.96798	1.09701	1.53621	1.12643	-0.723542	0	1	-0.777778	-7.10581	0.825812	5	0	0	214.273	214.273	1	-0.6416	0	0	0	1	11
1217		1.96491	1.09087	1.53314	1.12023	-0.0247	0	1	-0.777778	-7.13051	0.850512	6	0	0	211.546	211.546	1	0.474833	0	0	0	1	11
1218		1.96165	1.08473	1.52988	1.11403	0.667354	1	0	-0.777778	-6.46316	0.183159	7	0	0	208.086	208.086	1	0.823639	0	0	0	1	11
1219		1.96279	1.0786	1.53102	1.10785	-0.0266618	0	1	-0.777778	-6.48982	0.20982	8	0	0	203.953	203.953	1	0.689455	0	0	0	1	11
1220		1.96376	1.07249	1.53199	1.10168	-0.0272341	0	1	-0.777778	-6.51705	0.237054	9	0	0	199.236	199.236	1	-0.166072	0	0	0	1	11
1221		1.96456	1.0664	1.53279	1.09554	-0.0279479	0	1	-0.777778	-6.545	0.265002	10	0	0	114.36	114.36	1	-0.993485	0	0	0	1	11
1222		1.96517	1.06035	1.53341	1.08943	-0.0287962	0	1	-0.777778	-6.5738	0.293799	11	0	0	116.662	116.662	1	-0.989611	0	0	0	1	11
1223		1.96561	1.05435	1.53385	1.08337	-0.0297711	0	1	-1	-6.60357	0.32357	12	0	0	185.066	185.066	1	-0.980958	0	0	0	1	11
1224		1.96587	1.04839	1.5341	1.07736	-0.0308635	0	1	-1	-6.63443	0.354433	13	0	0	178.767	178.767	1	-0.955573	0	0	0	1	11
1225		1.96594	1.0425	1.53417	1.07141	-0.0320649	0	1	-1	-6.6665	0.386498	14	0	0	172.317	172.317	1	-0.827632	0	0	0	1	11
1226		1.96582	1.03667	1.53405	1.06553	-0.0333687	0	1	-1	-6.69987	0.419867	15	0	0	165.85	165.85	1	0.230695	0	0	0	1	11
1227		1.9655	1.03092	1.53373	1.05973	-0.0347617	0	1	-1	-6.73463	0.454629	16	0	0	159.477	159.477	1	0.883068	0	0	0	1	11
1228		1.96499	1.02526	1.53323	1.05401	-0.0362284	0	1	-1	-6.77086	0.490857	17	0	0	153.286	153.286	1	0.960498	0	0	0	1	11
1229		1.96429	1.01968	1.53252	1.04838	-0.0377524	0	1	-1	-6.80861	0.528609	18	0	0	147.351	147.351	1	0.980119	0	0	0	1	11
1230		1.96338	1.0142	1.53161	1.04285	-0.0393166	0	1	-1	-6.84793	0.567926	19	0	0	141.724	141.724	1	0.9878	0	0	0	1	11
1231		1.96227	1.00883	1.5305	1.03743	-0.0409032	0	1	-1	-6.88883	0.608829	20	0	0	136.451	136.451	1	0.991582	0	0	0	1	11
1232		1.96095	1.00357	1.52919	1.03212	-0.0424932	0	1	-1	-6.93132	0.651322	21	0	0	131.563	131.563	1	0.993723	0	0	0	1	11
1233		1.95943	0.998428	1.52766	1.02693	-0.0440664	0	1	-1	-6.97539	0.695389	22	0	0	127.088	127.088	1	0.995052	0	0	0	1	11
1234		1.9577	0.993411	1.52593	1.02186	-0.0456002	0	1	-1	-7.02099	0.740989	23	0	0	123.047	123.047	1	0.995931	0	0	0	1	11
1235		1.95576	0.988526	1.52399	1.01693	-0.0470686	0	1	-1	-7.06806	0.788058	24	0	0	119.463	119.463	1	0.996541	0	0	0	1	11
1236		1.95361	0.983778	1.52184	1.01214	-0.0484402	0	1	-1	-7.1165	0.836498	25	0	0	116.355	116.355	1	0.996977	0	0	0	1	11
1237		1.95124	0.979174	1.51948	1.0075	-0.0496772	0	1	-1	-7.16617	0.886175	26	0	0	113.733	113.733	1	0.997297	0	0	0	1	11
1238		1.94867	0.974718	1.5169	1.003	-0.0507343	0	1	-0.777778	-7.21691	0.936909	27	0	0	70.2806	70.2806	1	0.997536	0	0	0	1	11
1239		1.94588	0.970417	1.51411	0.998656	-0.0515646	0	1	-0.777778	-7.26847	0.988474	28	0	0	69.4588	69.4588	1	0.997715	0	0	0	1	11
1240		1.94288	0.966274	1.51111	0.994474	-0.0521368	0	1	-0.777778	-7.32061	1.04061	29	0	0	69.223	69.223	1	0.99785	0	0	0	1	11
1241		1.93966	0.962294	1.5079	0.990458	-0.0524476	0	1	-0.777778	-7.37306	1.09306	30	0	0	69.6732	69.6732	1	0.99795	0	0	0	1	11
1242		1.93624	0.958482	1.50447	0.98661	1.11252	1	0	-0.777778	-6.26054	6.26054	31	31	1	108.124	108.124	1	0.935189	0	0	0	1	11
1243		1.93773	0.954842	1.50596	0.982936	-0.0371426	0	1	-0.777778	-6.29768	0.0176826	0	0	0	108.146	108.146	1	0.637049	0	0	0	1	11
1244		1.939	0.951377	1.50723	0.979439	-0.0446047	0	1	-0.777778	-6.34229	0.0622873	1	0	0	108.736	108.736	1	-0.335455	0	0	0	1	11
1245		1.94004	0.948091	1.50827	0.976122	-0.0531293	0	1	-0.777778	-6.39542	0.115417	2	0	0	109.888	109.888	1	-0.996287	0	0	0	1	11
1246		1.94084	0.944986	1.50907	0.972989	-1.23541	0	1	-0.777778	-7.63083	1.35083	3	0	0	111.604	111.604	1	0.0433516	0	0	0	1	11
1247		1.9364	0.942066	1.50463	0.970041	-0.0506393	0	1	-1	-7.68147	1.40147	4	0	0	31.2797	31.2797	1	0.7577	0	0	0	1	11
1248		1.93175	0.939332	1.49998	0.967281	-0.0490454	0	1	-1	-7.73051	1.45051	5	0	0	31.1949	31.1949	1	0.942963	0	0	0	1	11
1249		1.92689	0.936786	1.49512	0.964712	-0.0472895	0	1	-1	-7.7778	1.4978	6	0	0	31.2932	31.2932	1	0.997689	0	0	0	1	11
1250		1.92182	0.93443	1.49005	0.962334	-0.0454179	0	1	-1	-7.82322	1.54322	7	0	0	31.5983	31.5983	1	0.99755	0	0	0	1	11
1251		1.91656	0.932264	1.48479	0.960148	-0.0434757	0	1	-1	-7.8667	1.5867	8	0	0	128.714	128.714	1	0.997365	0	0	0	1	11
1252		1.9111	0.93029	1.47933	0.958156	-0.0415054	0	1	-1	-7.9082	1.6282	9	0	0	134.448	134.448	1	0.997118	0	0	0	1	11
1253		1.90546	0.928508	1.47369	0.956357	-0.0395459	0	1	-1	-7.94775	1.66775	10	0	0	140.759	140.759	1	0.996788	0	0	0	1	11
1254		1.89963	0.926918	1.46787	0.954752	-0.0376291	0	1	-1	-7.98538	1.70538	11	0	0	147.637	147.637	1	0.996338	0	0	0	1	11
1255		1.89364	0.925519	1.46187	0.95334	-0.0357747	0	1	-1	-8.02115	1.74115	12	0	0	155.068	155.068	1	0.99571	0	0	0	1	11
1256		1.88748	0.92431	1.45571	0.95212	-0.0339932	0	1	-1	-8.05514	1.77514	13	0	0	163.043	163.043	1	0.994802	0	0	0	1	11
1257		1.88117	0.92329	1.4494	0.951091	-0.0322895	0	1	-1	-8.08743	1.80743	14	0	0	171.561	171.561	1	0.99343	0	0	0	1	11
1258		1.87471	0.922458	1.44294	0.95025	-0.0306632	0	1	-1	-8.1181	1.8381	15	0	0	180.629	180.629	1	0.991221	0	0	0	1	11
1259		1.86811	0.921811	1.43634	0.949597	-0.0291107	0	1	-1	-8.14721	1.86721	16	0	0	190.272	190.272	1	0.987323	0	0	0	1	11
1260		1.86137	0.921346	1.42961	0.949128	-0.0276273	0	1	-1	-8.17483	1.89483	17	0	0	200.53	200.53	1	0.979425	0	0	0	1	11
1261		1.85451	0.921061	1.42275	0.94884	-0.0262071	0	1	-1	-8.20104	1.92104	18	0	0	211.46	211.46	1	0.959315	0	0	0	1	11
1262		1.84754	0.920952	1.41577	0.948731	-0.0248442	0	1	-1	-8.22589	1.94589	19	0	0	223.135	223.135	1	0.880189	0	0	0	1	11
1263		1.84045	0.921017	1.40869	0.948795	-0.0235328	0	1	-1	-8.24942	1.96942	20	0	0	235.647	235.647	1	0.217554	0	0	0	1	11
1264		1.83327	0.921249	1.4015	0.94903	-0.0222674	0	1	-1	-8.27169	1.99169	21	0	0	249.109	249.109	1	-0.831964	0	0	0	1	11
1265		1.82598	0.921646	1.39421	0.949431	-0.021044	0	1	-1	-8.29273	2.01273	22	0	0	263.658	263.658	1	-0.95744	0	0	0	1	11
1266		1.8186	0.922203	1.38684	0.949993	-0.0198587	0	1	-1	-8.31259	2.03259	23	0	0	279.455	279.455	1	-0.982253	0	0	0	1	11
1267		1.81114	0.922913	1.37937	0.95071	-0.018708	0	1	-1	-8.3313	2.0513	24	0	0	296.697	296.697	1	-0.990668	0	0	0	1	11
1268		1.8036	0.923773	1.37183	0.951578	-0.0175889	0	1	-1	-8.34889	2.06889	25	0	0	315.613	315.613	1	-0.994417	0	0	0	1	11
1269		1.79599	0.924776	1.36422	0.95259	-0.0164989	0	1	-1	-8.36538	2.08538	26	0	0	336.482	336.482	1	-0.99638	0	0	0	1	11
1270		1.7883	0.925915	1.35654	0.95374	-0.0154353	0	1	-1	-8.38082	2.10082	27	0	0	359.643	359.643	1	-0.997522	0	0	0	1	11
1271		1.78056	0.927186	1.34879	0.955022	-0.0143971	0	1	-1	-8.39522	2.11522	28	0	0	385.512	385.512	1	-0.998238	0	0	0	1	11
1272		1.77275	0.928581	1.34099	0.95643	-0.0133838	0	1	-1	-8.4086	2.1286	29	0	0	414.607	414.607	1	-0.998713	0	0	0	1	11
1273		1.76489	0.930093	1.33313	0.957957	-0.0123948	0	1	-1	-8.421	2.141	30	0	0	447.577	447.577	1	-0.999042	0	0	0	1	11
1274		1.75699	0.931716	1.32522	0.959595	-0.0114286	0	1	-1	-8.43242	2.15242	31	0	0	485.248	485.248	1	-0.999276	0	0	0	1	11
1275		1.74904	0.933442	1.31727	0.961337	-0.0104847	0	1	-1	-8.44291	2.16291	32	0	0	528.692	528.692	1	-0.999449	0	0	0	1	11
1276		1.74105	0.935264	1.30928	0.963175	-0.00956276	0	1	-1	-8.45247	2.17247	33	0	0	579.337	579.337	1	-0.999578	0	0	0	1	11
1277		1.73302	0.937174	1.30125	0.965103	-0.00866282	0	1	-1	-8.46113	2.18113	34	0	0	639.153	639.153	1	-0.999677	0	0	0	1	11
1278		1.72496	0.939164	1.29319	0.967112	-0.0077847	0	1	-1	-8.46892	2.18892	35	0	0	710.939	710.939	1	-0.999753	0	0	0	1	11
1279		1.71688	0.941228	1.28511	0.969195	-0.00692774	0	1	-1	-8.47585	2.19585	36	0	0	798.82	798.82	1	-0.999812	0	0	0	1	11
1280		1.70877	0.943356	1.27701	0.971343	-0.00608992	0	1	-1	-8.48194	2.20194	37	0	0	909.159	0	0	-0.999859	0	0	0	1	11
1281		1.70065	0.945541	1.26888	0.973549	-0.00526801	0	1	-1	-8.4872	2.2072	38	0	0	1052.36	0	0	-0.999896	0	0	0	1	11
1282		1.69252	0.947776	1.26075	0.975804	-0.00445783	0	1	-1	-8.49166	2.21166	39	0	0	221.438	221.438	1	-0.999925	0	0	0	1	11
1283		1.68437	0.950051	1.25261	0.978101	-0.00365435	0	1	-1	-8.49532	2.21532	40	0	0	227.823	227.823	1	-0.999948	0	0	0	1	11
1284		1.67623	0.95236	1.24446	0.980431	-0.00285173	0	1	-1	-8.49817	2.21817	41	0	0	234.247	234.247	1	-0.999966	0	0	0	1	11
1285		1.66808	0.954694	1.23631	0.982787	-0.00204316	0	1	-0.777778	-8.50021	2.22021	42	0	0	3268.09	0	0	-0.99998	0	0	0	1	11
1286		1.65993	0.957046	1.22816	0.985161	-0.187804	0	1	-0.555556	-8.68802	2.40802	43	0	0	6133.52	0	0	-0.995365	0	0	0	1	11
1287		1.65525	0.959407	1.22349	0.987544	-0.00142621	0	1	-0.333333	-8.68944	2.40944	44	0	0	50894.5	0	0	-0.989515	0	0	0	1	11
1288		1.65059	0.96177	1.21882	0.989928	-0.000880035	0	1	-0.111111	-8.69032	2.41032	45	0	0	8031.22	0	0	-0.991513	0	0	0	0	11
1289		1.64595	0.964127	1.21418	0.992307	0.193012	1	0	0.111111	-8.49731	2.21731	46	0	0	3709.77	0	0	-0.99122	0	0	0	0	11
1290		1.63774	0.96647	1.20597	0.994673	0.00191382	1	0	0.333333	-8.4954	2.2154	47	0	0	2407.54	0	0	-0.98904	0	0	0	1	11
1291		1.62955	0.968792	1.19778	0.997017	0.00274608	1	0	0.555556	-8.49265	2.21265	48	0	0	233.897	233.897	1	-0.99514	0	0	0	1	11
1292		1.62137	0.971086	1.1896	0.999332	0.00358839	1	0	0.777778	-8.48906	2.20906	49	0	0	225.109	225.109	1	-0.999981	0	0	0	1	11
1293		1.61321	0.973345	1.18144	1.00161	0.00443531	1	0	1	-8.48463	2.20463	50	0	0	216.699	216.699	1	-0.999967	0	0	0	1	11
1294		1.60506	0.97556	1.17329	1.00385	0.00528197	1	0	1	-8.47934	2.19934	51	0	0	1059.36	0	0	-0.999948	0	0	0	1	11
1295		1.59693	0.977726	1.16516	1.00603	0.0061242	1	0	1	-8.47322	2.19322	52	0	0	915.048	0	0	-0.999923	0	0	0	1	11
1296		1.58881	0.979834	1.15704	1.00816	0.00695856	1	0	1	-8.46626	2.18626	53	0	0	805.935	805.935	1	-0.999893	0	0	0	1	11
1297		1.58071	0.98188	1.14894	1.01023	0.00778243	1	0	1	-8.45848	2.17848	54	0	0	720.775	720.775	1	-0.999855	0	0	0	1	11
1298		1.57262	0.983855	1.14086	1.01222	0.00859418	1	0	1	-8.44988	2.16988	55	0	0	652.604	652.604	1	-0.999809	0	0	0	1	11
1299		1.56455	0.985754	1.13278	1.01414	0.00939309	1	0	1	-8.44049	2.16049	56	0	0	596.885	596.885	1	-0.999752	0	0	0	1	11
1300		1.55649	0.987571	1.12473	1.01597	0.0101794	1	0	1	-8.43031	2.15031	57	0	0	550.541	550.541	1	-0.999682	0	0	0	1	11
1301		1.54845	0.989299	1.11668	1.01771	0.0109536	1	0	1	-8.41936	2.13936	58	0	0	511.418	511.418	1	-0.999595	0	0	0	1	11
1302		1.54043	0.990932	1.10866	1.01936	0.0117164	1	0	1	-8.40764	2.12764	59	0	0	477.967	477.967	1	-0.999486	0	0	0	1	11
1303		1.53242	0.992466	1.10065	1.02091	0.0124684	1	0	1	-8.39517	2.11517	60	0	0	449.053	449.053	1	-0.999346	0	0	0	1	11
1304		1.52442	0.993894	1.09266	1.02235	0.0132096	1	0	1	-8.38196	2.10196	61	0	0	423.821	423.821	1	-0.999164	0	0	0	1	11
1305		1.51645	0.995211	1.08468	1.02368	0.0139397	1	0	1	-8.36802	2.08802	62	0	0	401.617	401.617	1	-0.998924	0	0	0	1	11
1306		1.5085	0.996412	1.07673	1.02489	0.0146576	1	0	1	-8.35337	2.07337	63	0	0	381.93	381.93	1	-0.998596	0	0	0	1	11
1307		1.50056	0.997493	1.0688	1.02598	0.0153622	1	0	1	-8.338	2.058	64	0	0	364.357	364.357	1	-0.998136	0	0	0	1	11
1308		1.49265	0.998448	1.06088	1.02695	0.0160537	1	0	1	-8.32195	2.04195	65	0	0	348.573	348.573	1	-0.997464	0	0	0	1	11
1309		1.48476	0.999273	1.053	1.02778	0.016733	1	0	1	-8.30522	2.02522	66	0	0	334.314	334.314	1	-0.996431	0	0	0	1	11
1310		1.4769	0.999964	1.04513	1.02848	0.0174017	1	0	1	-8.28782	2.00782	67	0	0	321.363	321.363	1	-0.994735	0	0	0	1	11
1311		1.46907	1.00052	1.0373	1.02904	0.018061	1	0	1	-8.26976	1.98976	68	0	0	309.535	309.535	1	-0.991676	0	0	0	1	11
1312		1.46126	1.00093	1.02949	1.02945	0.0187122	1	0	1	-8.25104	1.97104	69	0	0	298.673	298.673	1	-0.985355	0	0	0	1	11
1313		1.45349	1.00119	1.02172	1.02972	0.0193566	1	0	1	-8.23169	1.95169	70	0	0	288.649	288.649	1	-0.969066	0	0	0	1	11
1314		1.44575	1.00131	1.01398	1.02983	0.019996	1	0	1	-8.21169	1.93169	71	0	0	279.362	279.362	1	-0.905827	0	0	0	1	11
1315		1.43805	1.00127	1.00628	1.02979	0.0206317	1	0	1	-8.19106	1.91106	72	0	0	270.739	270.739	1	-0.377771	0	0	0	1	11
1316		1.43039	1.00107	0.998626	1.0296	0.0212649	1	0	1	-8.16979	1.88979	73	0	0	262.733	262.733	1	0.785177	0	0	0	1	11
1317		1.42278	1.00072	0.991013	1.02924	0.0218953	1	0	1	-8.1479	1.8679	74	0	0	255.32	255.32	1	0.945102	0	0	0	1	11
1318		1.41522	1.0002	0.983448	1.02872	0.0225192	1	0	1	-8.12538	1.84538	75	0	0	248.489	248.489	1	0.975844	0	0	0	1	11
1319		1.4077	0.999519	0.975935	1.02803	0.0231294	1	0	1	-8.10225	1.82225	76	0	0	242.247	242.247	1	0.986365	0	0	0	1	11
1320		1.40024	0.998669	0.968477	1.02717	0.0237153	1	0	1	-8.07853	1.79853	77	0	0	236.605	236.605	1	0.99117	0	0	0	1	11
1321		1.39284	0.997649	0.961075	1.02614	0.0242647	1	0	1	-8.05427	1.77427	78	0	0	231.584	231.584	1	0.993769	0	0	0	1	11
1322		1.3855	0.996457	0.953731	1.02494	0.0247654	1	0	1	-8.0295	1.7495	79	0	0	227.207	227.207	1	0.995339	0	0	0	1	11
1323		1.37821	0.995089	0.946445	1.02356	0.025206	1	0	1	-8.0043	1.7243	80	0	0	223.5	223.5	1	0.996366	0	0	0	1	11
1324		1.37099	0.993545	0.939219	1.022	0.0255767	1	0	1	-7.97872	1.69872	81	0	0	247.778	247.778	1	0.997078	0	0	0	1	11
1325		1.36382	0.991822	0.932051	1.02026	0.0258689	1	0	1	-7.95285	1.67285	82	0	0	234.152	234.152	1	0.997595	0	0	0	1	11
1326		1.35671	0.989918	0.92494	1.01834	0.0260746	1	0	1	-7.92678	1.64678	83	0	0	220.826	220.826	1	0.997984	0	0	0	1	11
1327		1.34965	0.987832	0.917885	1.01623	0.0261864	1	0	1	-7.90059	1.62059	84	0	0	207.983	207.983	1	0.998285	0	0	0	1	11
1328		1.34265	0.985563	0.910884	1.01394	0.00110473	1	0	1	-7.89949	1.61949	85	0	0	195.771	195.771	1	0.999153	0	0	0	1	11
1329		1.33511	0.983109	0.90334	1.01147	0.0355147	1	0	1	-7.86397	1.58397	86	0	0	184.304	184.304	1	0.99933	0	0	0	1	11
1330		1.32787	0.980469	0.896103	1.0088	0.0372119	1	0	1	-7.82676	1.54676	87	0	0	173.662	173.662	1	0.998764	0	0	0	1	11
1331		1.32093	0.977642	0.889161	1.00595	0.0388143	1	0	1	-7.78795	1.50795	88	0	0	163.887	163.887	1	0.997882	0	0	0	1	11
1332		1.31427	0.974627	0.882505	1.00291	0.0402744	1	0	1	-7.74767	1.46767	89	0	0	154.992	154.992	1	0.998024	0	0	0	1	11
1333		1.30789	0.971423	0.876124	0.999672	0.041543	1	0	1	-7.70613	1.42613	90	0	0	136.914	136.914	1	0.998145	0	0	0	1	11
1334		1.30178	0.96803	0.870011	0.996248	0.0425739	1	0	1	-7.66356	1.38356	91	0	0	133.927	133.927	1	0.99825	0	0	0	1	11
1335		1.29592	0.964448	0.864155	0.992632	0.0433294	1	0	1	-7.62023	1.34023	92	0	0	131.834	131.834	1	0.998342	0	0	0	1	11
1336		1.29032	0.960675	0.858548	0.988824	0.0437796	1	0	1	-7.57645	1.29645	93	0	0	130.629	130.629	1	0.998424	0	0	0	1	11
1337		1.28495	0.956713	0.853179	0.984824	0.0439049	1	0	1	-7.53254	1.25254	94	0	0	130.31	130.31	1	0.998499	0	0	0	1	11
1338		1.27981	0.95256	0.84804	0.980633	0.0436984	1	0	1	-7.48884	1.20884	95	0	0	130.878	130.878	1	0.998567	0	0	0	1	11
1339		1.27489	0.948217	0.843121	0.976249	0.0431668	1	0	1	-7.44568	1.16568	96	0	0	132.343	132.343	1	0.998631	0	0	0	1	11
1340		1.27018	0.943683	0.838413	0.971674	0.0423295	1	0	1	-7.40335	1.12335	97	0	0	134.717	134.717	1	0.99869	0	0	0	1	11
1341		1.26567	0.93896	0.833905	0.966906	0.0412172	1	0	1	-7.36213	1.08213	98	0	0	138.024	138.024	1	0.998747	0	0	0	1	11
1342		1.26136	0.934048	0.82959	0.961948	0.0398683	1	0	0.777778	-7.32226	1.04226	99	0	0	250.546	250.546	1	0.998801	0	0	0	1	11
1343		1.25722	0.928946	0.825457	0.956799	0.0383266	1	0	0.777778	-7.28393	1.00393	100	0	0	291.449	291.449	1	0.998852	0	0	0	1	11
1344		1.25327	0.923655	0.821498	0.951459	0.0366375	1	0	0.777778	-7.2473	0.967297	101	0	0	349.576	349.576	1	0.998902	0	0	0	1	11
1345		1.24947	0.918177	0.817704	0.94593	0.0348454	1	0	0.777778	-7.21245	0.932451	102	0	0	437.404	437.404	1	0.99895	0	0	0	1	11
1346		1.24583	0.912512	0.814067	0.940211	-0.119568	0	1	0.777778	-7.33202	1.05202	103	0	0	583.422	583.422	1	0.999237	0	0	0	1	11
1347		1.241	0.90666	0.809231	0.934305	0.0155565	1	0	0.777778	-7.31646	1.03646	104	0	0	869.956	0	0	0.998696	0	0	0	1	11
1348		1.23617	0.900622	0.804398	0.928211	0.0145038	1	0	0.777778	-7.30196	1.02196	105	0	0	1674.32	0	0	0.999288	0	0	0	1	11
1349		1.23133	0.8944	0.799564	0.921931	0.0134719	1	0	0.777778	-7.28849	1.00849	106	0	0	16343.9	0	0	0.999844	0	0	0	1	11
1350		1.22649	0.887994	0.794725	0.915466	0.0124704	1	0	0.777778	-7.27602	0.996017	107	0	0	2194.28	0	0	0.999863	0	0	0	1	11
1351		1.22164	0.881407	0.789877	0.908817	0.0115057	1	0	1	-7.26451	0.984511	108	0	0	479.534	479.534	1	0.999881	0	0	0	1	11
1352		1.21678	0.874639	0.785015	0.901985	0.0105828	1	0	1	-7.25393	0.973928	109	0	0	520.177	520.177	1	0.999897	0	0	0	1	11
1353		1.2119	0.867691	0.780135	0.894973	0.0097052	1	0	1	-7.24422	0.964223	110	0	0	565.909	565.909	1	0.999911	0	0	0	1	11
1354		1.207	0.860566	0.775233	0.887782	0.00887558	1	0	1	-7.23535	0.955347	111	0	0	617.288	617.288	1	0.999924	0	0	0	1	11
1355		1.20207	0.853266	0.770306	0.880413	0.00809657	1	0	1	-7.22725	0.947251	112	0	0	674.908	674.908	1	0.999936	0	0	0	1	11
1356		1.19712	0.845792	0.76535	0.87287	0.00737042	1	0	1	-7.21988	0.93988	113	0	0	739.377	739.377	1	0.999946	0	0	0	1	11
1357		1.19213	0.838147	0.760361	0.865153	0.00669886	1	0	1	-7.21318	0.933181	114	0	0	811.283	811.283	1	0.999954	0	0	0	1	11
1358		1.1871	0.830333	0.755336	0.857266	0.00608272	1	0	1	-7.2071	0.927099	115	0	0	891.163	0	0	0.999962	0	0	0	1	11
1359		1.18204	0.822352	0.750274	0.849212	0.00552186	1	0	1	-7.20158	0.921577	116	0	0	979.468	0	0	0.999968	0	0	0	1	11
1360		1.17694	0.814208	0.74517	0.840992	0.0050151	1	0	1	-7.19656	0.916562	117	0	0	1076.5	0	0	0.999973	0	0	0	1	11
1361		1.17179	0.805903	0.740024	0.832609	0.00456032	1	0	1	-7.192	0.912001	118	0	0	1182.46	0	0	0.999978	0	0	0	1	11
1362		1.1666	0.797441	0.734833	0.824068	0.00415434	1	0	1	-7.18785	0.907847	119	0	0	1297.74	0	0	0.999982	0	0	0	1	11
1363		1.16136	0.788823	0.729597	0.81537	0.00379297	1	0	1	-7.18405	0.904054	120	0	0	1423.06	0	0	0.999985	0	0	0	1	11
1364		1.15608	0.780055	0.724315	0.80652	0.00347311	1	0	1	-7.18058	0.900581	121	0	0	1559.71	0	0	0.999987	0	0	0	1	11
1365		1.15075	0.771139	0.718986	0.797521	0.00318836	1	0	1	-7.17739	0.897393	122	0	0	1709.64	0	0	0.999989	0	0	0	1	11
1366		1.14538	0.762078	0.71361	0.788376	0.0029248	1	0	1	-7.17447	0.894468	123	0	0	1875.56	0	0	0.999991	0	0	0	1	11
1367		1.13995	0.752878	0.708188	0.77909	0.00267328	1	0	1	-7.17179	0.891795	124	0	0	2060.86	0	0	0.999992	0	0	0	1	11
1368		1.13449	0.743541	0.702718	0.769665	0.00242876	1	0	1	-7.16937	0.889366	125	0	0	2269.79	0	0	0.999993	0	0	0	1	11
1369		1.12897	0.734071	0.697203	0.760108	0.00219029	1	0	1	-7.16718	0.887175	126	0	0	2507.54	0	0	0.999995	0	0	0	1	11
1370		1.12341	0.724474	0.69164	0.750421	0.00196081	1	0	1	-7.16521	0.885215	127	0	0	2779.59	0	0	0.999996	0	0	0	1	11
1371		1.1178	0.714752	0.686032	0.740609	0.00174578	1	0	1	-7.16347	0.883469	128	0	0	3088.75	0	0	0.999996	0	0	0	1	11
1372		1.11215	0.704912	0.680378	0.730676	0.00154901	1	0	1	-7.16192	0.88192	129	0	0	3432.74	0	0	0.999997	0	0	0	1	11
1373		1.10645	0.694956	0.674678	0.720628	0.00137447	1	0	1	-7.16055	0.880545	130	0	0	3800.38	0	0	0.999998	0	0	0	1	11
1374		1.1007	0.68489	0.668934	0.710468	0.00122743	1	0	1	-7.15932	0.879318	131	0	0	4167.54	0	0	0.999998	0	0	0	1	11
1375		1.09491	0.674719	0.663146	0.700203	0.00111565	1	0	1	-7.1582	0.878202	132	0	0	4495.81	0	0	0.999999	0	0	0	1	11
1376		1.08908	0.664448	0.657316	0.689835	0.00104334	1	0	1	-7.15716	0.877159	133	0	0	4738.29	0	0	0.999999	0	0	0	1	11
1377		1.08321	0.65408	0.651446	0.679371	0.00101295	1	0	1	-7.15615	0.876146	134	0	0	4851.3	0	0	0.999999	0	0	0	1	11
1378		1.07731	0.643622	0.645539	0.668815	0.00102565	1	0	0.777778	-7.15512	0.87512	135	0	0	181.152	181.152	1	0.999999	0	0	0	1	11
1379		1.07137	0.633078	0.639598	0.658173	0.00108057	1	0	0.555556	-7.15404	0.87404	136	0	0	173.236	173.236	1	0.999999	0	0	0	1	11
1380		1.06539	0.622452	0.633626	0.647449	0.00117391	1	0	0.555556	-7.15287	0.872866	137	0	0	8346.45	0	0	0.999999	0	0	0	1	11
1381		1.0594	0.611751	0.627628	0.636648	0.00130203	1	0	0.555556	-7.15156	0.871564	138	0	0	10208.7	0	0	0.999999	0	0	0	1	11
1382		1.05338	0.600979	0.621609	0.625775	-0.286318	0	1	0.555556	-7.43788	1.15788	139	0	0	14032.3	0	0	0.990067	0	0	0	1	11
1383		1.04229	0.590141	0.610526	0.614836	-0.0114453	0	1	0.555556	-7.44933	1.16933	140	0	0	24769.9	0	0	0.987732	0	0	0	1	11
1384		1.03089	0.579242	0.599123	0.603836	0.285106	1	0	0.555556	-7.16422	0.884222	141	0	0	170134	0	0	0.993964	0	0	0	1	11
1385		1.02458	0.568287	0.592817	0.592778	0.00214138	1	0	0.555556	-7.16208	0.88208	142	0	0	31483.5	0	0	0.988791	0	0	0	1	11
1386		1.01828	0.557281	0.586514	0.581669	0.00235392	1	0	0.555556	-7.15973	0.879726	143	0	0	13818.6	0	0	0.99009	0	0	0	1	11
1387		1.01199	0.546228	0.580218	0.570513	0.00257768	1	0	0.777778	-7.15715	0.877149	144	0	0	171.117	171.117	1	0.999995	0	0	0	1	11
1388		1.0057	0.535133	0.573937	0.559315	0.00281354	1	0	1	-7.15434	0.874335	145	0	0	162.576	162.576	1	0.999994	0	0	0	1	11
1389		0.999443	0.524002	0.567676	0.54808	0.00306497	1	0	1	-7.15127	0.87127	146	0	0	1778.39	0	0	0.999992	0	0	0	1	11
1390		0.993209	0.512837	0.561442	0.536812	0.00334195	1	0	1	-7.14793	0.867928	147	0	0	1630.4	0	0	0.999991	0	0	0	1	11
1391		0.987009	0.501645	0.555241	0.525515	0.00364679	1	0	1	-7.14428	0.864281	148	0	0	1497.22	0	0	0.999989	0	0	0	1	11
1392		0.980849	0.490428	0.549081	0.514194	0.00397804	1	0	1	-7.1403	0.860303	149	0	0	1377.29	0	0	0.999987	0	0	0	1	11
1393		0.974736	0.479192	0.542969	0.502853	0.00433193	1	0	1	-7.13597	0.855971	150	0	0	1269.19	0	0	0.999984	0	0	0	1	11
1394		0.968678	0.46794	0.536911	0.491496	0.00470566	1	0	1	-7.13127	0.851266	151	0	0	1171.68	0	0	0.999981	0	0	0	1	11
1395		0.962682	0.456676	0.530915	0.480127	0.00509499	1	0	1	-7.12617	0.846171	152	0	0	1083.85	0	0	0.999977	0	0	0	1	11
1396		0.956756	0.445403	0.524988	0.468749	0.00549961	1	0	1	-7.12067	0.840671	153	0	0	1004.77	0	0	0.999973	0	0	0	1	11
1397		0.950906	0.434126	0.519139	0.457367	0.00592052	1	0	1	-7.11475	0.834751	154	0	0	933.455	0	0	0.999968	0	0	0	1	11
1398		0.945141	0.422848	0.513373	0.445983	0.00635896	1	0	1	-7.10839	0.828392	155	0	0	868.954	0	0	0.999962	0	0	0	1	11
1399		0.939467	0.411571	0.5077	0.434601	0.00681657	1	0	1	-7.10158	0.821575	156	0	0	810.364	810.364	1	0.999956	0	0	0	1	11
1400		0.933892	0.400299	0.502125	0.423224	0.0072954	1	0	1	-7.09428	0.81428	157	0	0	756.856	756.856	1	0.999948	0	0	0	1	11
1401		0.928423	0.389034	0.496656	0.411855	0.00779791	1	0	1	-7.08648	0.806482	158	0	0	707.735	707.735	1	0.99994	0	0	0	1	11
1402		0.923068	0.37778	0.491301	0.400496	0.00832699	1	0	1	-7.07815	0.798155	159	0	0	662.46	662.46	1	0.999929	0	0	0	1	11
1403		0.917834	0.366538	0.486067	0.389149	0.00888587	1	0	1	-7.06927	0.789269	160	0	0	620.635	620.635	1	0.999917	0	0	0	1	11
1404		0.912729	0.355311	0.480961	0.377817	0.00947806	1	0	1	-7.05979	0.779791	161	0	0	581.983	581.983	1	0.999903	0	0	0	1	11
1405		0.907759	0.344101	0.475992	0.366502	0.0101067	1	0	1	-7.04968	0.769684	162	0	0	546.301	546.301	1	0.999886	0	0	0	1	11
1406		0.902933	0.332909	0.471166	0.355206	0.0107721	1	0	1	-7.03891	0.758912	163	0	0	513.422	513.422	1	0.999865	0	0	0	1	11
1407		0.898259	0.321737	0.466492	0.34393	0.0114697	1	0	1	-7.02744	0.747442	164	0	0	483.19	483.19	1	0.999841	0	0	0	1	11
1408		0.893745	0.310587	0.461978	0.332677	0.0121927	1	0	1	-7.01525	0.73525	165	0	0	455.45	455.45	1	0.999811	0	0	0	1	11
1409		0.889398	0.29946	0.457631	0.321446	0.0129339	1	0	1	-7.00232	0.722316	166	0	0	430.035	430.035	1	0.999776	0	0	0	1	11
1410		0.885226	0.288357	0.453459	0.310239	0.0136873	1	0	1	-6.98863	0.708629	167	0	0	406.781	406.781	1	0.999734	0	0	0	1	11
1411		0.881237	0.27728	0.44947	0.299058	0.0144492	1	0	1	-6.97418	0.694179	168	0	0	385.526	385.526	1	0.999683	0	0	0	1	11
1412		0.877439	0.266228	0.445671	0.287903	0.0152188	1	0	1	-6.95896	0.67896	169	0	0	366.117	366.117	1	0.999622	0	0	0	1	11
1413		0.873837	0.255202	0.44207	0.276775	0.0159972	1	0	1	-6.94296	0.662963	170	0	0	348.41	348.41	1	0.999547	0	0	0	1	11
1414		0.87044	0.244205	0.438672	0.265675	0.0167854	1	0	1	-6.92618	0.646178	171	0	0	332.272	332.272	1	0.999454	0	0	0	1	11
1415		0.867253	0.233235	0.435486	0.254603	0.0175814	1	0	1	-6.9086	0.628597	172	0	0	317.58	317.58	1	0.999338	0	0	0	1	11
1416		0.864284	0.222293	0.432517	0.24356	0.0183781	1	0	1	-6.89022	0.610218	173	0	0	304.23	304.23	1	0.999189	0	0	0	1	11
1417		0.861539	0.211381	0.429772	0.232545	0.0191666	1	0	1	-6.87105	0.591052	174	0	0	292.133	292.133	1	0.998998	0	0	0	1	11
1418		0.859023	0.200497	0.427256	0.22156	0.0199376	1	0	1	-6.85111	0.571114	175	0	0	281.216	281.216	1	0.998745	0	0	0	1	11
1419		0.856744	0.189643	0.424976	0.210605	0.020682	1	0	1	-6.83043	0.550432	176	0	0	271.42	271.42	1	0.998404	0	0	0	1	11
1420		0.854705	0.178818	0.422938	0.199679	0.0213912	1	0	1	-6.80904	0.529041	177	0	0	262.692	262.692	1	0.99793	0	0	0	1	11
1421		0.852912	0.168024	0.421145	0.188784	0.0220573	1	0	1	-6.78698	0.506984	178	0	0	254.98	254.98	1	0.99725	0	0	0	1	11
1422		0.85137	0.157259	0.419602	0.177919	0.0226732	1	0	1	-6.76431	0.484311	179	0	0	248.236	248.236	1	0.996223	0	0	0	1	11
1423		0.850081	0.146524	0.418314	0.167084	0.023233	1	0	1	-6.74108	0.461078	180	0	0	242.427	242.427	1	0.994574	0	0	0	1	11
1424		0.84905	0.135819	0.417283	0.15628	0.0237316	1	0	0.777778	-6.71735	0.437346	181	0	0	97.4733	97.4733	1	0.991686	0	0	0	1	11
1425		0.84828	0.125145	0.416512	0.145506	0.0241629	1	0	0.777778	-6.69318	0.413183	182	0	0	95.6513	95.6513	1	0.985952	0	0	0	1	11
1426		0.847772	0.1145	0.416005	0.134762	0.024519	1	0	0.777778	-6.66866	0.388664	183	0	0	94.0626	94.0626	1	0.972046	0	0	0	1	11
1427		0.847529	0.103886	0.415761	0.124049	0.0247873	1	0	0.777778	-6.64388	0.363877	184	0	0	223.958	223.958	1	0.923652	0	0	0	1	11
1428		0.847551	0.0933014	0.415783	0.113365	-0.701979	0	1	0.777778	-7.34586	1.06586	185	0	0	220.566	220.566	1	0.750864	0	0	0	1	11
1429		0.83858	0.0827467	0.406812	0.102712	0.0115736	1	0	0.777778	-7.33428	1.05428	186	0	0	218.276	218.276	1	0.888567	0	0	0	1	11
1430		0.829842	0.0722217	0.398074	0.0920892	0.0131859	1	0	0.777778	-7.3211	1.0411	187	0	0	217.068	217.068	1	0.97056	0	0	0	1	11
1431		0.82136	0.0617264	0.389593	0.0814961	0.781113	1	0	0.777778	-6.53998	0.259983	188	0	0	216.921	216.921	1	0.95915	0	0	0	1	11
1432		0.822484	0.0512607	0.390717	0.0709328	0.0266827	1	0	0.777778	-6.5133	0.2333	189	0	0	217.806	217.806	1	0.814783	0	0	0	1	11
1433		0.823889	0.0408244	0.392122	0.0603992	0.0261216	1	0	1	-6.48718	0.207179	190	0	0	52.5733	52.5733	1	0.288334	0	0	0	1	11
1434		0.825571	0.0304174	0.393804	0.0498952	0.0254434	1	0	1	-6.46174	0.181735	191	0	0	52.0014	52.0014	1	-0.994255	0	0	0	1	11
1435		0.827523	0.0200397	0.395756	0.0394208	0.0246765	1	0	1	-6.43706	0.157059	192	0	0	51.5744	51.5744	1	-0.99601	0	0	0	1	11
1436		0.829737	0.00969134	0.39797	0.028976	0.0238457	1	0	1	-6.41321	0.133213	193	0	0	235.533	235.533	1	-0.997102	0	0	0	1	11
1437		0.832206	-0.000627785	0.400439	0.0185607	0.0229756	1	0	1	-6.39024	0.110238	194	0	0	243.849	243.849	1	-0.997823	0	0	0	1	11
1438		0.834921	-0.0109176	0.403154	0.00817494	0.022084	1	0	1	-6.36815	0.0881536	195	0	0	253.157	253.157	1	-0.998322	0	0	0	1	11
1439		0.837874	-0.021178	0.406107	-0.00218113	0.0211848	1	0	1	-6.34697	0.0669688	196	0	0	263.417	263.417	1	-0.99868	0	0	0	1	11
1440		0.841057	-0.031409	0.40929	-0.0125075	0.0202896	1	0	1	-6.32668	0.0466792	197	0	0	274.595	274.595	1	-0.998943	0	0	0	1	11
1441		0.844461	-0.0416104	0.412694	-0.0228039	0.0194077	1	0	1	-6.30727	0.0272716	198	0	0	286.658	286.658	1	-0.999141	0	0	0	1	11
1442		0.848077	-0.051782	0.41631	-0.0330703	0.0185469	1	0	1	-6.28872	0.00872462	199	0	0	299.579	299.579	1	-0.999294	0	0	0	1	11
1443		0.851898	-0.0619237	0.420131	-0.0433065	0.0177136	1	0	1	-6.27101	6.27101	200	0	0	313.334	313.334	1	-0.999413	0	0	0	1	11
1444		0.855915	-0.0720353	0.424147	-0.0535124	0.0169124	1	0	1	-6.2541	6.2541	201	0	0	327.903	327.903	1	-0.999508	0	0	0	1	11
1445		0.860119	-0.0821167	0.428352	-0.0636878	0.0161463	1	0	1	-6.23795	6.23795	202	0	0	343.274	343.274	1	-0.999583	0	0	0	1	11
1446		0.864504	-0.0921676	0.432737	-0.0738324	0.0154165	1	0	1	-6.22254	6.22254	203	0	0	359.448	359.448	1	-0.999645	0	0	0	1	11
1447		0.869062	-0.102188	0.437295	-0.0839462	0.0147222	1	0	1	-6.20781	6.20781	204	0	0	376.445	376.445	1	-0.999695	0	0	0	1	11
1448		0.873786	-0.112178	0.442019	-0.0940291	0.0140609	1	0	1	-6.19375	6.19375	205	0	0	394.31	394.31	1	-0.999736	0	0	0	1	11
1449		0.878669	-0.122137	0.446902	-0.104081	0.013429	1	0	1	-6.18032	6.18032	206	0	0	413.115	413.115	1	-0.999771	0	0	0	1	11
1450		0.883704	-0.132065	0.451937	-0.114102	0.0128221	1	0	1	-6.1675	6.1675	207	0	0	432.961	432.961	1	-0.9998	0	0	0	1	11
1451		0.888885	-0.141963	0.457118	-0.124091	0.0122359	1	0	1	-6.15527	6.15527	208	0	0	453.983	453.983	1	-0.999824	0	0	0	1	11
1452		0.894206	-0.15183	0.462439	-0.13405	0.011667	1	0	1	-6.1436	6.1436	209	0	0	476.341	476.341	1	-0.999846	0	0	0	1	11
1453		0.89966	-0.161666	0.467893	-0.143979	0.0111127	1	0	1	-6.13249	6.13249	210	0	0	500.226	500.226	1	-0.999864	0	0	0	1	11
1454		0.905242	-0.171473	0.473475	-0.153877	0.0105717	1	0	1	-6.12191	6.12191	211	0	0	525.853	525.853	1	-0.99988	0	0	0	1	11
1455		0.910945	-0.18125	0.479178	-0.163745	0.0100435	1	0	1	-6.11187	6.11187	212	0	0	553.46	553.46	1	-0.999894	0	0	0	1	11
1456		0.916764	-0.190998	0.484997	-0.173584	0.00952785	1	0	1	-6.10234	6.10234	213	0	0	583.314	583.314	1	-0.999907	0	0	0	1	11
1457		0.922693	-0.200718	0.490926	-0.183394	0.00902486	1	0	1	-6.09332	6.09332	214	0	0	615.71	615.71	1	-0.999918	0	0	0	1	11
1458		0.928726	-0.21041	0.496959	-0.193177	0.00853445	1	0	1	-6.08478	6.08478	215	0	0	650.988	650.988	1	-0.999928	0	0	0	1	11
1459		0.934859	-0.220077	0.503092	-0.202934	0.00805636	1	0	1	-6.07673	6.07673	216	0	0	689.542	689.542	1	-0.999937	0	0	0	1	11
1460		0.941086	-0.229718	0.509319	-0.212665	0.00759014	1	0	1	-6.06914	6.06914	217	0	0	731.846	731.846	1	-0.999944	0	0	0	1	11
1461		0.947402	-0.239336	0.515635	-0.222373	0.00713522	1	0	1	-6.062	6.062	218	0	0	778.474	778.474	1	-0.999951	0	0	0	1	11
1462		0.953803	-0.248932	0.522035	-0.232058	0.00669093	1	0	1	-6.05531	6.05531	219	0	0	830.138	830.138	1	-0.999958	0	0	0	1	11
1463		0.960283	-0.258509	0.528516	-0.241724	0.00625664	1	0	1	-6.04905	6.04905	220	0	0	887.747	0	0	-0.999963	0	0	0	1	11
1464		0.966839	-0.268067	0.535072	-0.251371	0.00583187	1	0	1	-6.04322	6.04322	221	0	0	952.503	0	0	-0.999968	0	0	0	1	11
1465		0.973467	-0.277609	0.5417	-0.261003	0.00541605	1	0	1	-6.03781	6.03781	222	0	0	1026	0	0	-0.999973	0	0	0	1	11
1466		0.980163	-0.287139	0.548396	-0.270621	0.00500836	1	0	1	-6.0328	6.0328	223	0	0	1110.41	0	0	-0.999977	0	0	0	1	11
1467		0.986923	-0.296657	0.555156	-0.280228	0.00460712	1	0	1	-6.02819	6.02819	224	0	0	1208.78	0	0	-0.99998	0	0	0	1	11
1468		0.993744	-0.306168	0.561977	-0.289828	0.00420893	1	0	1	-6.02398	6.02398	225	0	0	1325.5	0	0	-0.999983	0	0	0	1	11
1469		1.00062	-0.315675	0.568855	-0.299423	0.0038117	1	0	1	-6.02017	6.02017	226	0	0	1467.13	0	0	-0.999986	0	0	0	1	11
1470		1.00756	-0.325179	0.575788	-0.309016	0.00341284	1	0	1	-6.01676	6.01676	227	0	0	1643.85	0	0	-0.999989	0	0	0	1	11
1471		1.01454	-0.334686	0.582772	-0.318612	0.00300905	1	0	1	-6.01375	6.01375	228	0	0	1872.15	0	0	-0.999991	0	0	0	1	11
1472		1.02157	-0.344199	0.589805	-0.328213	0.0025968	1	0	1	-6.01115	6.01115	229	0	0	2180.34	0	0	-0.999993	0	0	0	1	11
1473		1.02865	-0.353721	0.596884	-0.337824	0.00217285	1	0	1	-6.00898	6.00898	230	0	0	2621.07	0	0	-0.999995	0	0	0	1	11
1474		1.03577	-0.363258	0.604005	-0.347449	0.00173475	1	0	0.777778	-6.00724	6.00724	231	0	0	3304.49	0	0	-0.999996	0	0	0	1	11
1475		1.04293	-0.372812	0.611165	-0.357092	0.00128149	1	0	0.555556	-6.00596	6.00596	232	0	0	4506.14	0	0	-0.999998	0	0	0	1	11
1476		1.05013	-0.382389	0.618362	-0.366759	0.000813837	1	0	0.333333	-6.00515	6.00515	233	0	0	7163.16	0	0	-0.999999	0	0	0	1	11
1477		1.05736	-0.391993	0.625592	-0.376452	0.000334425	1	0	0.111111	-6.00481	6.00481	234	0	0	17845.5	0	0	-0.999999	0	0	0	0	11
1478		1.06462	-0.401629	0.63285	-0.386178	-0.00015249	0	1	-0.111111	-6.00497	6.00497	235	0	0	35414.5	0	0	-1	0	0	0	0	11
1479		1.0719	-0.411302	0.640135	-0.395942	-0.000641476	0	1	-0.333333	-6.00561	6.00561	236	0	0	8886.56	0	0	-1	0	0	0	1	11
1480		1.07921	-0.421018	0.647441	-0.405748	-0.00112652	0	1	-0.555556	-6.00673	6.00673	237	0	0	5100.69	0	0	-1	0	0	0	1	11
1481		1.08653	-0.430781	0.654766	-0.415602	-0.00160158	0	1	-0.777778	-6.00834	6.00834	238	0	0	3597.55	0	0	-0.999999	0	0	0	1	11
1482		1.09387	-0.440597	0.662106	-0.425509	-0.00206106	0	1	-1	-6.0104	6.0104	239	0	0	2797.69	0	0	-0.999998	0	0	0	1	11
1483		1.10122	-0.450471	0.669457	-0.435476	-0.0025001	0	1	-1	-6.0129	6.0129	240	0	0	2305.88	0	0	-0.999997	0	0	0	1	11
1484		1.10859	-0.460409	0.676818	-0.445506	-0.00291469	0	1	-1	-6.01581	6.01581	241	0	0	1976.45	0	0	-0.999995	0	0	0	1	11
1485		1.11595	-0.470417	0.684185	-0.455607	-0.00330158	0	1	-1	-6.01911	6.01911	242	0	0	1743.14	0	0	-0.999993	0	0	0	1	11
1486		1.12332	-0.480499	0.691555	-0.465784	-0.00365821	0	1	-1	-6.02277	6.02277	243	0	0	1571.53	0	0	-0.999992	0	0	0	1	11
1487		1.13069	-0.490662	0.698928	-0.476041	-0.00398253	0	1	-1	-6.02675	6.02675	244	0	0	1441.95	0	0	-0.99999	0	0	0	1	11
1488		1.13807	-0.500911	0.7063	-0.486386	-0.00427303	0	1	-1	-6.03103	6.03103	245	0	0	1342.41	0	0	-0.999988	0	0	0	1	11
1489		1.14544	-0.511252	0.713672	-0.496823	-0.00452871	0	1	-1	-6.03556	6.03556	246	0	0	1265.17	0	0	-0.999986	0	0	0	1	11
1490		1.15281	-0.52169	0.721041	-0.507358	-0.004749	0	1	-1	-6.04031	6.04031	247	0	0	1205.01	0	0	-0.999984	0	0	0	1	11
1491		1.16017	-0.53223	0.728407	-0.517996	-0.00493378	0	1	-1	-6.04524	6.04524	248	0	0	1158.38	0	0	-0.999982	0	0	0	1	11
1492		1.16754	-0.542877	0.735771	-0.528743	-0.00508359	0	1	-1	-6.05032	6.05032	249	0	0	1122.77	0	0	-0.999981	0	0	0	1	11
1493		1.1749	-0.553637	0.743131	-0.539603	-0.00519978	0	1	-1	-6.05552	6.05552	250	0	0	1096.4	0	0	-0.999979	0	0	0	1	11
1494		1.18226	-0.564515	0.75049	-0.550583	-0.00528406	0	1	-1	-6.06081	6.06081	251	0	0	1077.96	0	0	-0.999978	0	0	0	1	11
1495		1.18961	-0.575516	0.757846	-0.561686	-0.0053365	0	1	-1	-6.06614	6.06614	252	0	0	1066.54	0	0	-0.999977	0	0	0	1	11
1496		1.19697	-0.586643	0.765201	-0.572917	-0.00535789	0	1	-1	-6.0715	6.0715	253	0	0	1061.48	0	0	-0.999976	0	0	0	1	11
1497		1.20432	-0.597902	0.772556	-0.58428	-0.00534941	0	1	-1	-6.07685	6.07685	254	0	0	1062.33	0	0	-0.999976	0	0	0	1	11
1498		1.21168	-0.609296	0.779913	-0.595781	-0.00531235	0	1	-1	-6.08216	6.08216	255	0	0	1068.84	0	0	-0.999976	0	0	0	1	11
1499		1.21904	-0.62083	0.787273	-0.607423	-0.00524818	0	1	-1	-6.08741	6.08741	256	0	0	1080.92	0	0	-0.999976	0	0	0	1	11
1500		1.22641	-0.632507	0.794639	-0.619209	-0.00515859	0	1	-1	-6.09257	6.09257	257	0	0	1098.54	0	0	-0.999976	0	0	0	1	11
1501		1.23378	-0.644331	0.802011	-0.631143	-0.00504557	0	1	-1	-6.09761	6.09761	258	0	0	1121.74	0	0	-0.999977	0	0	0	1	11
1502		1.24116	-0.656305	0.809393	-0.643228	-0.00491146	0	1	-1	-6.10253	6.10253	259	0	0	1150.64	0	0	-0.999978	0	0	0	1	11
1503		1.24855	-0.668431	0.816787	-0.655467	-0.00475895	0	1	-1	-6.10729	6.10729	260	0	0	1185.33	0	0	-0.999979	0	0	0	1	11
1504		1.25596	-0.680712	0.824194	-0.667862	-0.00459118	0	1	-1	-6.11188	6.11188	261	0	0	1225.88	0	0	-0.99998	0	0	0	1	11
1505		1.26339	-0.69315	0.831619	-0.680417	-0.00441173	0	1	-1	-6.11629	6.11629	262	0	0	1272.21	0	0	-0.999981	0	0	0	1	11
1506		1.27083	-0.705748	0.839063	-0.693132	-0.00422465	0	1	-1	-6.12051	6.12051	263	0	0	1324.04	0	0	-0.999982	0	0	0	1	11
1507		1.2783	-0.718506	0.846529	-0.706009	-0.00403449	0	1	-0.777778	-6.12455	6.12455	264	0	0	7652.77	0	0	-0.999984	0	0	0	1	11
1508		1.28579	-0.731426	0.85402	-0.719049	-0.00384632	0	1	-0.555556	-6.12839	6.12839	265	0	0	1813.03	0	0	-0.999985	0	0	0	1	11
1509		1.29331	-0.744508	0.861538	-0.732253	-0.0036659	0	1	-0.333333	-6.13206	6.13206	266	0	0	1030.7	0	0	-0.999986	0	0	0	1	11
1510		1.30085	-0.757754	0.869084	-0.745623	-0.0034998	0	1	-0.111111	-6.13556	6.13556	267	0	0	721.729	0	0	-0.999987	0	0	0	0	11
1511		1.30843	-0.771163	0.876662	-0.759156	0.039598	1	0	0.111111	-6.09596	6.09596	268	0	0	556.635	0	0	-0.999863	0	0	0	0	11
1512		1.31683	-0.784735	0.88506	-0.772855	0.0163866	1	0	0.333333	-6.07957	6.07957	269	0	0	454.148	454.148	1	-0.99958	0	0	0	1	11
1513		1.32564	-0.798469	0.893874	-0.786717	0.0164418	1	0	0.555556	-6.06313	6.06313	270	0	0	384.519	384.519	1	-0.999534	0	0	0	1	11
1514		1.33489	-0.812364	0.90312	-0.800742	0.0164554	1	0	0.777778	-6.04668	6.04668	271	0	0	334.276	334.276	1	-0.999773	0	0	0	1	11
1515		1.34458	-0.82642	0.91281	-0.814929	0.0164214	1	0	1	-6.03026	6.03026	272	0	0	296.432	296.432	1	-0.999779	0	0	0	1	11
1516		1.35473	-0.840635	0.92296	-0.829276	0.0163336	1	0	1	-6.01392	6.01392	273	0	0	345.982	345.982	1	-0.999786	0	0	0	1	11
1517		1.36535	-0.855006	0.933581	-0.843781	0.0161859	1	0	1	-5.99774	5.99774	274	0	0	349.603	349.603	1	-0.999793	0	0	0	1	11
1518		1.37645	-0.869531	0.944685	-0.858441	0.0159724	1	0	1	-5.98176	5.98176	275	0	0	354.756	354.756	1	-0.999801	0	0	0	1	11
1519		1.38805	-0.884208	0.956281	-0.873255	0.0156873	1	0	1	-5.96608	5.96608	276	0	0	361.694	361.694	1	-0.99981	0	0	0	1	11
1520		1.40015	-0.899033	0.968379	-0.888219	0.0153256	1	0	1	-5.95075	5.95075	277	0	0	370.732	370.732	1	-0.999819	0	0	0	1	11
1521		1.41275	-0.914004	0.980982	-0.903329	0.0148825	1	0	1	-5.93587	5.93587	278	0	0	382.27	382.27	1	-0.99983	0	0	0	1	11
1522		1.42586	-0.929116	0.994095	-0.918582	0.0143544	1	0	1	-5.92151	5.92151	279	0	0	396.819	396.819	1	-0.999841	0	0	0	1	11
1523		1.43948	-0.944367	1.00772	-0.933975	0.0137389	1	0	1	-5.90778	5.90778	280	0	0	415.044	415.044	1	-0.999854	0	0	0	1	11
1524		1.45361	-0.95975	1.02184	-0.949502	0.013035	1	0	1	-5.89474	5.89474	281	0	0	437.824	437.824	1	-0.999867	0	0	0	1	11
1525		1.46823	-0.975263	1.03646	-0.965159	0.0122434	1	0	1	-5.8825	5.8825	282	0	0	466.333	466.333	1	-0.999881	0	0	0	1	11
1526		1.48334	-0.9909	1.05157	-0.980942	0.0113674	1	0	1	-5.87113	5.87113	283	0	0	502.146	502.146	1	-0.999895	0	0	0	1	11
1527		1.49891	-1.00666	1.06714	-0.996845	0.010413	1	0	0.777778	-5.86072	5.86072	284	0	0	402.37	402.37	1	-0.99991	0	0	0	1	11
1528		1.51492	-1.02253	1.08315	-1.01286	0.00938907	1	0	0.555556	-5.85133	5.85133	285	0	0	349.087	349.087	1	-0.999925	0	0	0	1	11
1529		1.53135	-1.0385	1.09958	-1.02899	0.00831058	1	0	0.333333	-5.84302	5.84302	286	0	0	309.197	309.197	1	-0.999939	0	0	0	1	11
1530		1.54816	-1.05459	1.11639	-1.04522	0.00719879	1	0	0.111111	-5.83582	5.83582	287	0	0	278.311	0	0	-0.999952	0	0	0	0	11
1531		1.56531	-1.07076	1.13355	-1.06155	-0.210556	0	1	-0.111111	-6.04637	6.04637	288	0	0	253.776	0	0	-0.997431	0	0	0	0	11
1532		1.57653	-1.08703	1.14477	-1.07797	-0.00531912	0	1	-0.333333	-6.05169	6.05169	289	0	0	233.894	233.894	1	-0.993834	0	0	0	1	11
1533		1.58769	-1.10338	1.15592	-1.09447	-0.00553219	0	1	-0.555556	-6.05723	6.05723	290	0	0	217.521	217.521	1	-0.994986	0	0	0	1	11
1534		1.59876	-1.1198	1.16699	-1.11105	-0.00578863	0	1	-0.777778	-6.06301	6.06301	291	0	0	203.855	203.855	1	-0.999975	0	0	0	1	11
1535		1.60973	-1.1363	1.17797	-1.1277	-0.00608452	0	1	-1	-6.0691	6.0691	292	0	0	192.309	192.309	1	-0.999972	0	0	0	1	11
1536		1.62061	-1.15286	1.18884	-1.14441	-0.00641542	0	1	-1	-6.07551	6.07551	293	0	0	855.232	0	0	-0.999969	0	0	0	1	11
1537		1.63137	-1.16947	1.1996	-1.16118	-0.00677881	0	1	-1	-6.08229	6.08229	294	0	0	810.748	810.748	1	-0.999965	0	0	0	1	11
1538		1.642	-1.18614	1.21023	-1.178	-0.0071732	0	1	-1	-6.08947	6.08947	295	0	0	767.056	767.056	1	-0.999961	0	0	0	1	11
1539		1.65248	-1.20284	1.22072	-1.19485	-0.00759803	0	1	-1	-6.09706	6.09706	296	0	0	114.102	114.102	1	-0.999955	0	0	0	1	11
1540		1.66281	-1.21957	1.23105	-1.21174	-0.00805438	0	1	-1	-6.10512	6.10512	297	0	0	111.129	111.129	1	-0.999949	0	0	0	1	11
1541		1.67297	-1.23633	1.24121	-1.22866	-0.00854232	0	1	-1	-6.11366	6.11366	298	0	0	108.19	108.19	1	-0.999942	0	0	0	1	11
1542		1.68295	-1.25311	1.25118	-1.24559	-0.00906186	0	1	-1	-6.12272	6.12272	299	299	1	105.375	105.375	1	-0.999934	0	0	0	1	11
1543		1.69272	-1.26989	1.26095	-1.26253	-0.380599	0	1	-1	-6.50332	0.223322	0	0	0	102.743	102.743	1	-0.983977	0	0	0	1	11
1544		1.69515	-1.28667	1.26338	-1.27947	-0.0178655	0	1	-1	-6.52119	0.241188	1	0	0	100.33	100.33	1	-0.949033	0	0	0	1	11
1545		1.69727	-1.30345	1.26551	-1.29641	-0.0186946	0	1	-0.777778	-6.53988	0.259882	2	0	0	498.715	498.715	1	-0.920365	0	0	0	1	11
1546		1.69908	-1.32021	1.26731	-1.31332	-0.0191843	0	1	-0.777778	-6.55907	0.279067	3	0	0	488.314	488.314	1	-0.995392	0	0	0	1	11
1547		1.70055	-1.33695	1.26878	-1.33021	-0.0193882	0	1	-0.777778	-6.57845	0.298455	4	0	0	478.608	478.608	1	-0.993117	0	0	0	1	11
1548		1.70169	-1.35365	1.26992	-1.34707	-0.0193555	0	1	-0.777778	-6.59781	0.31781	5	0	0	190.309	190.309	1	-0.989143	0	0	0	1	11
1549		1.7025	-1.37031	1.27073	-1.36388	0.391952	1	0	-0.777778	-6.20586	6.20586	6	0	0	186.272	186.272	1	-0.880125	0	0	0	1	11
1550		1.71039	-1.38691	1.27862	-1.38065	-0.010688	0	1	-0.777778	-6.21655	6.21655	7	0	0	182.2	182.2	1	-0.92484	0	0	0	1	11
1551		1.71804	-1.40346	1.28627	-1.39735	-0.0111485	0	1	-0.777778	-6.22769	6.22769	8	0	0	178.332	178.332	1	-0.977649	0	0	0	1	11
1552		1.72543	-1.41994	1.29366	-1.41398	-0.0116358	0	1	-0.777778	-6.23933	6.23933	9	0	0	174.834	174.834	1	-0.999845	0	0	0	1	11
1553		1.73256	-1.43635	1.30079	-1.43054	-0.0121437	0	1	-0.777778	-6.25147	6.25147	10	0	0	171.815	171.815	1	-0.999824	0	0	0	1	11
1554		1.73942	-1.45266	1.30765	-1.44701	-0.0126675	0	1	-1	-6.26414	6.26414	11	0	0	439.109	439.109	1	-0.9998	0	0	0	1	11
1555		1.74599	-1.46889	1.31422	-1.46338	-0.013204	0	1	-1	-6.27735	6.27735	12	12	1	421.621	421.621	1	-0.999771	0	0	0	1	11
1556		1.75227	-1.485	1.32051	-1.47965	-0.0137509	0	1	-1	-6.2911	0.0110964	0	0	0	405.149	405.149	1	-0.999738	0	0	0	1	11
1557		1.75826	-1.50101	1.32649	-1.49581	-0.0143065	0	1	-1	-6.3054	0.0254029	1	0	0	389.735	389.735	1	-0.999698	0	0	0	1	11
1558		1.76394	-1.5169	1.33218	-1.51184	-0.0148688	0	1	-1	-6.32027	0.0402716	2	0	0	375.381	375.381	1	-0.999651	0	0	0	1	11
1559		1.76931	-1.53265	1.33755	-1.52775	-0.0154337	0	1	-1	-6.33571	0.0557053	3	0	0	362.062	362.062	1	-0.999596	0	0	0	1	11
1560		1.77437	-1.54827	1.3426	-1.54351	-0.015993	0	1	-1	-6.3517	0.0716983	4	0	0	349.74	349.74	1	-0.999528	0	0	0	1	11
1561		1.7791	-1.56375	1.34733	-1.55913	-0.0165402	0	1	-1	-6.36824	0.0882385	5	0	0	338.369	338.369	1	-0.999447	0	0	0	1	11
1562		1.78351	-1.57906	1.35174	-1.57459	-0.017073	0	1	-1	-6.38531	0.105312	6	0	0	81.7053	81.7053	1	-0.999349	0	0	0	1	11
1563		1.78759	-1.59422	1.35582	-1.58988	-0.0175908	0	1	-1	-6.4029	0.122902	7	0	0	81.2948	81.2948	1	-0.999227	0	0	0	1	11
1564		1.79134	-1.6092	1.35957	-1.60501	-0.0180928	0	1	-0.777778	-6.421	0.140995	8	0	0	337.804	337.804	1	-0.999074	0	0	0	1	11
1565		1.79476	-1.62401	1.36299	-1.61995	-0.0185784	0	1	-0.777778	-6.43957	0.159574	9	0	0	330.186	330.186	1	-0.998879	0	0	0	1	11
1566		1.79785	-1.63863	1.36608	-1.63471	-0.480722	0	1	-0.777778	-6.9203	0.640296	10	0	0	323.038	323.038	1	-0.778307	0	0	0	1	11
1567		1.79375	-1.65305	1.36198	-1.64926	-0.0179738	0	1	-0.777778	-6.93827	0.658269	11	0	0	316.301	316.301	1	0.2287	0	0	0	1	11
1568		1.78943	-1.66727	1.35766	-1.66362	0.453839	1	0	-0.777778	-6.48443	0.204431	12	0	0	309.923	309.923	1	0.720612	0	0	0	1	11
1569		1.79173	-1.68128	1.35997	-1.67776	-0.0194245	0	1	-0.777778	-6.50386	0.223855	13	0	0	303.857	303.857	1	0.529922	0	0	0	1	11
1570		1.79373	-1.69508	1.36196	-1.69168	-0.0199066	0	1	-0.777778	-6.52376	0.243762	14	0	0	298.061	298.061	1	-0.51843	0	0	0	1	11
1571		1.79541	-1.70865	1.36364	-1.70538	-0.0203856	0	1	-0.777778	-6.54415	0.264147	15	0	0	173.295	173.295	1	-0.995984	0	0	0	1	11
1572		1.79678	-1.72199	1.36502	-1.71884	-0.0208597	0	1	-0.777778	-6.56501	0.285007	16	0	0	176.177	176.177	1	-0.994199	0	0	0	1	11
1573		1.79786	-1.73509	1.36609	-1.73207	-0.0213287	0	1	-1	-6.58634	0.306336	17	0	0	261.869	261.869	1	-0.990989	0	0	0	1	11
1574		1.79863	-1.74795	1.36686	-1.74505	-0.0217934	0	1	-1	-6.60813	0.328129	18	0	0	256.224	256.224	1	-0.984359	0	0	0	1	11
1575		1.79911	-1.76055	1.36734	-1.75777	-0.0222553	0	1	-1	-6.63038	0.350385	19	0	0	250.817	250.817	1	-0.967226	0	0	0	1	11
1576		1.79931	-1.77291	1.36754	-1.77024	-0.0227168	0	1	-1	-6.6531	0.373101	20	0	0	245.613	245.613	1	-0.899892	0	0	0	1	11
1577		1.79922	-1.785	1.36745	-1.78244	-0.0231809	0	1	-1	-6.67628	0.396282	21	0	0	240.572	240.572	1	-0.330717	0	0	0	1	11
1578		1.79886	-1.79682	1.36709	-1.79437	-0.0236515	0	1	-1	-6.69993	0.419934	22	0	0	235.659	235.659	1	0.798968	0	0	0	1	11
1579		1.79823	-1.80837	1.36646	-1.80603	-0.0241331	0	1	-1	-6.72407	0.444067	23	0	0	230.842	230.842	1	0.947765	0	0	0	1	11
1580		1.79734	-1.81964	1.36557	-1.81741	-0.02463	0	1	-1	-6.7487	0.468697	24	0	0	226.096	226.096	1	0.976931	0	0	0	1	11
1581		1.79619	-1.83063	1.36443	-1.8285	-0.0251459	0	1	-1	-6.77384	0.493843	25	0	0	221.395	221.395	1	0.986971	0	0	0	1	11
1582		1.7948	-1.84134	1.36304	-1.83931	-0.0256827	0	1	-1	-6.79953	0.519526	26	0	0	216.72	216.72	1	0.991554	0	0	0	1	11
1583		1.79318	-1.85175	1.36141	-1.84982	-0.0262415	0	1	-1	-6.82577	0.545767	27	0	0	212.052	212.052	1	0.99402	0	0	0	1	11
1584		1.79132	-1.86188	1.35955	-1.86004	-0.0268243	0	1	-1	-6.85259	0.572591	28	0	0	207.376	207.376	1	0.995497	0	0	0	1	11
1585		1.78924	-1.8717	1.35747	-1.86995	-0.0274345	0	1	-1	-6.88003	0.600026	29	0	0	202.679	202.679	1	0.996451	0	0	0	1	11
1586		1.78695	-1.88122	1.35518	-1.87956	-0.0280763	0	1	-1	-6.9081	0.628102	30	0	0	197.95	197.95	1	0.997101	0	0	0	1	11
1587		1.78445	-1.89044	1.35268	-1.88887	-0.0287548	0	1	-1	-6.93686	0.656857	31	0	0	193.176	193.176	1	0.997562	0	0	0	1	11
1588		1.78176	-1.89936	1.34999	-1.89787	-0.0294753	0	1	-1	-6.96633	0.686332	32	0	0	188.338	188.338	1	0.997899	0	0	0	1	11
1589		1.77888	-1.90796	1.34711	-1.90655	-0.030244	0	1	-1	-6.99658	0.716576	33	0	0	183.406	183.406	1	0.998151	0	0	0	1	11
1590		1.77581	-1.91626	1.34405	-1.91493	-0.0310676	0	1	-1	-7.02764	0.747644	34	0	0	86.3743	86.3743	1	0.998341	0	0	0	1	11
1591		1.77258	-1.92424	1.34081	-1.92298	-0.0319553	0	1	-1	-7.0596	0.779599	35	0	0	88.6754	88.6754	1	0.998486	0	0	0	1	11
1592		1.76918	-1.93191	1.33741	-1.93073	-0.0329224	0	1	-1	-7.09252	0.812522	36	0	0	91.1675	91.1675	1	0.998596	0	0	0	1	11
1593		1.76562	-1.93927	1.33386	-1.93815	-0.0339969	0	1	-0.777778	-7.12652	0.846519	37	0	0	194.551	194.551	1	0.998677	0	0	0	1	11
1594		1.76192	-1.94632	1.33015	-1.94526	-0.335162	0	1	-0.777778	-7.46168	1.18168	38	0	0	186.745	186.745	1	0.980947	0	0	0	1	11
1595		1.7547	-1.95304	1.32294	-1.95205	-0.0129824	0	1	-0.777778	-7.47466	1.19466	39	0	0	178.883	178.883	1	0.980797	0	0	0	1	11
1596		1.74765	-1.95945	1.31588	-1.95852	-0.0132676	0	1	-0.777778	-7.48793	1.20793	40	0	0	171.044	171.044	1	0.992073	0	0	0	1	11
1597		1.74075	-1.96555	1.30899	-1.96467	0.263362	1	0	-0.777778	-7.22457	0.944568	41	0	0	163.333	163.333	1	0.996891	0	0	0	1	11
1598		1.73694	-1.97133	1.30518	-1.97051	-0.0410377	0	1	-0.777778	-7.26561	0.985606	42	0	0	155.871	155.871	1	0.99269	0	0	0	1	11
1599		1.73301	-1.97679	1.30124	-1.97602	-0.0428923	0	1	-0.777778	-7.3085	1.0285	43	0	0	1331.3	0	0	0.994699	0	0	0	1	11
1600		1.72896	-1.98194	1.29719	-1.98122	-0.0448257	0	1	-0.777778	-7.35332	1.07332	44	0	0	651.889	651.889	1	0.998598	0	0	0	1	11
1601		1.72478	-1.98677	1.29302	-1.9861	-0.0467894	0	1	-0.777778	-7.40011	1.12011	45	0	0	426.948	426.948	1	0.998535	0	0	0	1	11
1602		1.7205	-1.9913	1.28873	-1.99066	-0.0487238	0	1	-1	-7.44884	1.16884	46	0	0	115.166	115.166	1	0.99845	0	0	0	1	11
1603		1.7161	-1.9955	1.28433	-1.99491	-0.0505807	0	1	-1	-7.49942	1.21942	47	0	0	111.279	111.279	1	0.99834	0	0	0	1	11
1604		1.71159	-1.9994	1.27982	-1.99884	-0.0523131	0	1	-1	-7.55173	1.27173	48	0	0	107.899	107.899	1	0.998198	0	0	0	1	11
1605		1.70697	-2.00299	1.2752	-2.00246	-0.0538715	0	1	-1	-7.6056	1.3256	49	0	0	105.051	105.051	1	0.998018	0	0	0	1	11
1606		1.70225	-2.00627	1.27048	-2.00577	-0.0552071	0	1	-1	-7.66081	1.38081	50	0	0	102.75	102.75	1	0.997786	0	0	0	1	11
1607		1.69742	-2.00924	1.26565	-2.00877	-0.056275	0	1	-1	-7.71708	1.43708	51	0	0	101.002	101.002	1	0.997484	0	0	0	1	11
1608		1.69249	-2.01191	1.26072	-2.01147	-0.0570331	0	1	-1	-7.77412	1.49412	52	0	0	99.8099	99.8099	1	0.997081	0	0	0	1	11
1609		1.68746	-2.01427	1.25569	-2.01385	-0.0574486	0	1	-1	-7.83157	1.55157	53	0	0	99.1784	99.1784	1	0.996533	0	0	0	1	11
1610		1.68232	-2.01633	1.25056	-2.01593	-0.0575003	0	1	-1	-7.88907	1.60907	54	0	0	97.3211	97.3211	1	0.995761	0	0	0	1	11
1611		1.67709	-2.01809	1.24533	-2.01771	-0.057185	0	1	-1	-7.94625	1.66625	55	0	0	99.0891	99.0891	1	0.994623	0	0	0	1	11
1612		1.67177	-2.01956	1.24	-2.01919	-0.0565232	0	1	-1	-8.00277	1.72277	56	0	0	100.761	100.761	1	0.992842	0	0	0	1	11
1613		1.66634	-2.02073	1.23457	-2.02037	-0.0555179	0	1	-1	-8.05829	1.77829	57	0	0	102.049	102.049	1	0.989818	0	0	0	1	11
1614		1.66082	-2.0216	1.22905	-2.02125	-0.0635391	0	1	-1	-8.12183	1.84183	58	0	0	103.978	103.978	1	0.980882	0	0	0	1	11
1615		1.65464	-2.02218	1.22287	-2.02184	-0.045996	0	1	-1	-8.16783	1.88783	59	0	0	106.55	106.55	1	0.966383	0	0	0	1	11
1616		1.64859	-2.02248	1.21682	-2.02213	-0.0478638	0	1	-1	-8.21569	1.93569	60	0	0	109.764	109.764	1	0.931575	0	0	0	1	11
1617		1.64302	-2.02248	1.21125	-2.02214	-0.0507396	0	1	-1	-8.26643	1.98643	61	0	0	113.624	113.624	1	0.678336	0	0	0	1	11
1618		1.63735	-2.0222	1.20558	-2.02186	-0.0483129	0	1	-1	-8.31474	2.03474	62	0	0	118.126	118.126	1	-0.622412	0	0	0	1	11
1619		1.63157	-2.02164	1.1998	-2.02129	-0.0458386	0	1	-1	-8.36058	2.08058	63	0	0	126.152	126.152	1	-0.932823	0	0	0	1	11
1620		1.62568	-2.0208	1.19392	-2.02044	-0.0433767	0	1	-1	-8.40396	2.12396	64	0	0	129.927	129.927	1	-0.97546	0	0	0	1	11
1621		1.6197	-2.01967	1.18793	-2.0193	-0.0409745	0	1	-1	-8.44493	2.16493	65	0	0	122.827	122.827	1	-0.987817	0	0	0	1	11
1622		1.61361	-2.01827	1.18184	-2.01789	-0.0386675	0	1	-0.777778	-8.4836	2.2036	66	0	0	140.636	140.636	1	-0.992885	0	0	0	1	11
1623		1.60742	-2.01659	1.17565	-2.0162	-0.0364799	0	1	-0.777778	-8.52008	2.24008	67	0	0	148.592	148.592	1	-0.995407	0	0	0	1	11
1624		1.60113	-2.01464	1.16936	-2.01423	-0.034426	0	1	-0.777778	-8.55451	2.27451	68	0	0	157.094	157.094	1	-0.996825	0	0	0	1	11
1625		1.59474	-2.01242	1.16297	-2.01198	-0.0702142	0	1	-0.777778	-8.62472	2.34472	69	0	0	134.29	134.29	1	-0.996263	0	0	0	1	11
1626		1.58891	-2.00993	1.15715	-2.00947	0.00105607	1	0	-0.777778	-8.62367	2.34367	70	0	0	135.754	135.754	1	-0.997403	0	0	0	1	11
1627		1.58244	-2.00716	1.15068	-2.00668	-0.0291851	0	1	-0.555556	-8.65285	2.37285	71	0	0	177.878	177.878	1	-0.998778	0	0	0	1	11
1628		1.57588	-2.00413	1.14411	-2.00362	-0.0275405	0	1	-0.555556	-8.68039	2.40039	72	0	0	187.704	187.704	1	-0.999463	0	0	0	1	11
1629		1.56923	-2.00084	1.13746	-2.00029	-0.0976852	0	1	-0.333333	-8.77808	2.49808	73	0	0	287.718	287.718	1	-0.997513	0	0	0	1	11
1630		1.56351	-1.99728	1.13174	-1.9967	-0.0369395	0	1	-0.333333	-8.81502	2.53502	74	0	0	450.224	450.224	1	-0.996468	0	0	0	1	11
1631		1.55784	-1.99345	1.12608	-1.99284	0.048974	1	0	-0.555556	-8.76604	2.48604	75	0	0	421.141	421.141	1	-0.998628	0	0	0	1	11
1632		1.5511	-1.98936	1.11934	-1.98871	-0.021695	0	1	-0.555556	-8.78774	2.50774	76	0	0	521.209	521.209	1	-0.9999	0	0	0	1	11
1633		1.54427	-1.98501	1.1125	-1.98432	0.0586143	1	0	-0.555556	-8.72912	2.44912	77	0	0	670.532	670.532	1	-0.999494	0	0	0	1	11
1634		1.53599	-1.9804	1.10423	-1.97966	-0.00718779	0	1	-0.555556	-8.73631	2.45631	78	0	0	3002.44	0	0	-0.999662	0	0	0	1	11
1635		1.5274	-1.97553	1.09563	-1.97475	-0.00665013	0	1	-0.555556	-8.74296	2.46296	79	0	0	1056.9	0	0	-0.999801	0	0	0	1	11
1636		1.51849	-1.9704	1.08672	-1.96957	-0.0062814	0	1	-0.777778	-8.74924	2.46924	80	0	0	6400.36	0	0	-0.999958	0	0	0	1	11
1637		1.50926	-1.96501	1.07749	-1.96413	-0.0060747	0	1	-0.777778	-8.75532	2.47532	81	0	0	7186.34	0	0	-0.999963	0	0	0	1	11
1638		1.49972	-1.95937	1.06796	-1.95844	-0.00602665	0	1	-1	-8.76134	2.48134	82	0	0	271.933	271.933	1	-0.999966	0	0	0	1	11
1639		1.48989	-1.95347	1.05812	-1.95248	-0.00613741	0	1	-1	-8.76748	2.48748	83	0	0	261.286	261.286	1	-0.999967	0	0	0	1	11
1640		1.47977	-1.94731	1.04801	-1.94627	-0.00641077	0	1	-1	-8.77389	2.49389	84	0	0	251.352	251.352	1	-0.999966	0	0	0	1	11
1641		1.46939	-1.9409	1.03762	-1.9398	-0.00685439	0	1	-1	-8.78075	2.50075	85	0	0	242.252	242.252	1	-0.999964	0	0	0	1	11
1642		1.45876	-1.93424	1.02699	-1.93307	-0.133128	0	1	-1	-8.91387	2.63387	86	0	0	234.062	234.062	1	-0.998329	0	0	0	1	11
1643		1.45042	-1.92732	1.01866	-1.92609	-0.014716	0	1	-1	-8.92859	2.64859	87	0	0	122.701	122.701	1	-0.996745	0	0	0	1	11
1644		1.44204	-1.92016	1.01027	-1.91886	-0.0142501	0	1	-1	-8.94284	2.66284	88	0	0	120.567	120.567	1	-0.997629	0	0	0	1	11
1645		1.43361	-1.91274	1.00184	-1.91138	-0.0137898	0	1	-1	-8.95663	2.67663	89	0	0	118.943	118.943	1	-0.999856	0	0	0	1	11
1646		1.42513	-1.90508	0.993368	-1.90364	-0.0133313	0	1	-1	-8.96996	2.68996	90	0	0	117.802	117.802	1	-0.999866	0	0	0	1	11
1647		1.41662	-1.89717	0.984851	-1.89566	-0.200834	0	1	-1	-9.17079	2.89079	91	0	0	165.661	165.661	1	-0.996644	0	0	0	1	11
1648		1.41078	-1.88901	0.979014	-1.88742	-0.0133851	0	1	-1	-9.18418	2.90418	92	0	0	168.845	168.845	1	-0.993399	0	0	0	1	11
1649		1.40494	-1.88061	0.973172	-1.87894	-0.0120984	0	1	-1	-9.19628	2.91628	93	0	0	172.366	172.366	1	-0.995147	0	0	0	1	11
1650		1.39908	-1.87197	0.967315	-1.87022	-0.0109476	0	1	-1	-9.20723	2.92723	94	0	0	176.21	176.21	1	-0.999881	0	0	0	1	11
1651		1.3932	-1.86308	0.961437	-1.86126	-0.00991834	0	1	-1	-9.21714	2.93714	95	0	0	180.365	180.365	1	-0.999901	0	0	0	1	11
1652		1.3873	-1.85396	0.955531	-1.85205	-0.00899712	0	1	-1	-9.22614	2.94614	96	0	0	598.984	598.984	1	-0.999917	0	0	0	1	11
1653		1.38136	-1.84461	0.949592	-1.84261	-0.00817166	0	1	-1	-9.23431	2.95431	97	0	0	660.115	660.115	1	-0.999931	0	0	0	1	11
1654		1.37538	-1.83502	0.943615	-1.83293	-0.00743068	0	1	-1	-9.24174	2.96174	98	0	0	726.724	726.724	1	-0.999942	0	0	0	1	11
1655		1.36936	-1.8252	0.937594	-1.82302	-0.00676396	0	1	-1	-9.24851	2.96851	99	0	0	799.295	799.295	1	-0.999951	0	0	0	1	11
1656		1.3633	-1.81515	0.931528	-1.81287	-0.00616237	0	1	-1	-9.25467	2.97467	100	0	0	878.418	0	0	-0.999959	0	0	0	1	11
1657		1.35718	-1.80487	0.925412	-1.8025	-0.00561769	0	1	-0.777778	-9.26029	2.98029	101	0	0	511.937	511.937	1	-0.999965	0	0	0	1	11
1658		1.35101	-1.79438	0.919244	-1.79191	-0.00512268	0	1	-0.555556	-9.26541	2.98541	102	0	0	224.288	224.288	1	-0.999971	0	0	0	1	11
1659		1.34479	-1.78366	0.913021	-1.78109	-0.00467089	0	1	-0.555556	-9.27008	2.99008	103	0	0	220.656	220.656	1	-0.999976	0	0	0	1	11
1660		1.33851	-1.77273	0.906741	-1.77006	-0.00425665	0	1	-0.555556	-9.27434	2.99434	104	0	0	217.99	217.99	1	-0.999979	0	0	0	1	11
1661		1.33217	-1.76159	0.900404	-1.75882	0.146334	1	0	-0.555556	-9.128	2.848	105	0	0	216.194	216.194	1	-0.99771	0	0	0	1	11
1662		1.32329	-1.75024	0.891521	-1.74736	0.117689	1	0	-0.555556	-9.01032	2.73032	106	0	0	215.204	215.204	1	-0.991918	0	0	0	1	11
1663		1.31182	-1.73869	0.880049	-1.7357	-0.00374431	0	1	-0.555556	-9.01406	2.73406	107	0	0	214.976	214.976	1	-0.994338	0	0	0	1	11
1664		1.30023	-1.72694	0.868467	-1.72384	-0.00397847	0	1	-0.555556	-9.01804	2.73804	108	0	0	215.483	215.483	1	-0.999147	0	0	0	1	11
1665		1.28855	-1.71499	0.856785	-1.71178	-0.00424779	0	1	-0.555556	-9.02229	2.74229	109	0	0	216.707	216.707	1	-0.999989	0	0	0	1	11
1666		1.27679	-1.70285	0.845019	-1.69953	-0.00454867	0	1	-0.777778	-9.02683	2.74683	110	0	0	631.292	631.292	1	-0.999987	0	0	0	1	11
1667		1.26495	-1.69053	0.833181	-1.68709	-0.00487564	0	1	-1	-9.03171	2.75171	111	0	0	1133.02	0	0	-0.999985	0	0	0	1	11
1668		1.25305	-1.67803	0.821287	-1.67447	-0.00522076	0	1	-1	-9.03693	2.75693	112	0	0	1066.72	0	0	-0.999983	0	0	0	1	11
1669		1.24112	-1.66535	0.809352	-1.66168	-0.00557303	0	1	-1	-9.0425	2.7625	113	0	0	1008.79	0	0	-0.999981	0	0	0	1	11
1670		1.22916	-1.6525	0.797392	-1.64871	-0.00591765	0	1	-1	-9.04842	2.76842	114	0	0	960.665	0	0	-0.999978	0	0	0	1	11
1671		1.21719	-1.63949	0.785423	-1.63558	-0.00623517	0	1	-1	-9.05466	2.77466	115	0	0	923.838	0	0	-0.999975	0	0	0	1	11
1672		1.20523	-1.62632	0.773459	-1.62229	-0.00650068	0	1	-1	-9.06116	2.78116	116	0	0	283.242	283.242	1	-0.999973	0	0	0	1	11
1673		1.19328	-1.613	0.761515	-1.60884	-0.00668278	0	1	-1	-9.06784	2.78784	117	0	0	286.108	286.108	1	-0.99997	0	0	0	1	11
1674		1.18137	-1.59954	0.749601	-1.59525	-0.00674272	0	1	-1	-9.07458	2.79458	118	0	0	290.175	290.175	1	-0.999969	0	0	0	1	11
1675		1.16949	-1.58593	0.737726	-1.58152	-0.00663342	0	1	-1	-9.08122	2.80122	119	0	0	295.52	295.52	1	-0.999968	0	0	0	1	11
1676		1.15766	-1.57219	0.725894	-1.56765	-0.127868	0	1	-1	-9.20908	2.92908	120	0	0	167.816	167.816	1	-0.998562	0	0	0	1	11
1677		1.14852	-1.55832	0.716754	-1.55365	-0.00344395	0	1	-0.777778	-9.21253	2.93253	121	0	0	173.223	173.223	1	-0.997301	0	0	0	1	11
1678		1.13937	-1.54433	0.707603	-1.53953	-0.00311213	0	1	-0.555556	-9.21564	2.93564	122	0	0	179.123	179.123	1	-0.998223	0	0	0	1	11
1679		1.13021	-1.53023	0.69844	-1.5253	-0.00278613	0	1	-0.333333	-9.21843	2.93843	123	0	0	185.506	185.506	1	-0.999992	0	0	0	1	11
1680		1.12103	-1.51601	0.689262	-1.51095	-0.135606	0	1	-0.111111	-9.35403	3.07403	124	0	0	192.315	0	0	-0.998157	0	0	0	0	11
1681		1.11434	-1.5017	0.682574	-1.4965	0.00284473	1	0	0.111111	-9.35119	3.07119	125	0	0	385.393	0	0	-0.996418	0	0	0	0	11
1682		1.10756	-1.48728	0.67579	-1.48195	0.00286983	1	0	0.333333	-9.34832	3.06832	126	0	0	405.662	405.662	1	-0.997685	0	0	0	1	11
1683		1.10068	-1.47278	0.668913	-1.46732	0.00290774	1	0	0.555556	-9.34541	3.06541	127	0	0	427.202	427.202	1	-0.99999	0	0	0	1	11
1684		1.09371	-1.4582	0.661944	-1.45259	0.00295526	1	0	0.777778	-9.34245	3.06245	128	0	0	450.103	450.103	1	-0.99999	0	0	0	1	11
1685		1.08665	-1.44353	0.654884	-1.4378	0.00300985	1	0	1	-9.33945	3.05945	129	0	0	1843.64	0	0	-0.99999	0	0	0	1	11
1686		1.0795	-1.4288	0.647736	-1.42292	0.00306945	1	0	1	-9.33638	3.05638	130	0	0	1811.4	0	0	-0.99999	0	0	0	1	11
1687		1.07227	-1.414	0.640499	-1.40799	0.00313244	1	0	1	-9.33324	3.05324	131	0	0	1777.7	0	0	-0.999989	0	0	0	1	11
1688		1.06494	-1.39915	0.633176	-1.39299	0.00319751	1	0	1	-9.33005	3.05005	132	0	0	1743.61	0	0	-0.999989	0	0	0	1	11
1689		1.05753	-1.38424	0.625767	-1.37794	0.00326359	1	0	1	-9.32678	3.04678	133	0	0	1709.9	0	0	-0.999989	0	0	0	1	11
1690		1.05004	-1.36928	0.618273	-1.36285	0.00332984	1	0	1	-9.32345	3.04345	134	0	0	1677.1	0	0	-0.999988	0	0	0	1	11
1691		1.04246	-1.35428	0.610696	-1.34771	0.00339558	1	0	1	-9.32006	3.04006	135	0	0	1645.58	0	0	-0.999988	0	0	0	1	11
1692		1.0348	-1.33925	0.603037	-1.33254	0.00346023	1	0	1	-9.3166	3.0366	136	0	0	1615.58	0	0	-0.999987	0	0	0	1	11
1693		1.02706	-1.32419	0.595295	-1.31733	0.00352332	1	0	1	-9.31307	3.03307	137	0	0	1587.23	0	0	-0.999987	0	0	0	1	11
1694		1.01924	-1.3091	0.587474	-1.3021	0.00358445	1	0	1	-9.30949	3.02949	138	0	0	1560.64	0	0	-0.999987	0	0	0	1	11
1695		1.01134	-1.29399	0.579572	-1.28685	0.00364328	1	0	1	-9.30585	3.02585	139	0	0	1535.84	0	0	-0.999986	0	0	0	1	11
1696		1.00336	-1.27886	0.571592	-1.27159	0.00369949	1	0	1	-9.30215	3.02215	140	0	0	1512.86	0	0	-0.999986	0	0	0	1	11
1697		0.995302	-1.26373	0.563535	-1.25632	0.0037528	1	0	1	-9.29839	3.01839	141	0	0	1491.7	0	0	-0.999986	0	0	0	1	11
1698		0.987168	-1.24859	0.555401	-1.24103	0.00380293	1	0	1	-9.29459	3.01459	142	0	0	1472.37	0	0	-0.999986	0	0	0	1	11
1699		0.978958	-1.23345	0.547191	-1.22575	0.0038496	1	0	1	-9.29074	3.01074	143	0	0	1454.87	0	0	-0.999985	0	0	0	1	11
1700		0.970673	-1.21831	0.538906	-1.21047	0.00389249	1	0	1	-9.28685	3.00685	144	0	0	1439.22	0	0	-0.999985	0	0	0	1	11
1701		0.962314	-1.20317	0.530547	-1.19519	0.00393128	1	0	1	-9.28292	3.00292	145	0	0	1425.44	0	0	-0.999985	0	0	0	1	11
1702		0.953882	-1.18805	0.522115	-1.17993	0.00396556	1	0	1	-9.27895	2.99895	146	0	0	1413.6	0	0	-0.999985	0	0	0	1	11
1703		0.945378	-1.17293	0.513611	-1.16467	0.00399491	1	0	1	-9.27496	2.99496	147	0	0	1403.74	0	0	-0.999985	0	0	0	1	11
1704		0.936802	-1.15784	0.505034	-1.14943	0.00401883	1	0	1	-9.27094	2.99094	148	0	0	1395.96	0	0	-0.999985	0	0	0	1	11
1705		0.928155	-1.14276	0.496388	-1.13421	0.00403678	1	0	1	-9.2669	2.9869	149	0	0	1390.37	0	0	-0.999985	0	0	0	1	11
1706		0.919438	-1.12769	0.487671	-1.11901	0.0040482	1	0	1	-9.26285	2.98285	150	0	0	1387.1	0	0	-0.999985	0	0	0	1	11
1707		0.910652	-1.11265	0.478884	-1.10383	0.00405247	1	0	1	-9.2588	2.9788	151	0	0	1386.3	0	0	-0.999985	0	0	0	1	11
1708		0.901797	-1.09764	0.470029	-1.08867	0.004049	1	0	1	-9.25475	2.97475	152	0	0	1388.15	0	0	-0.999985	0	0	0	1	11
1709		0.892874	-1.08265	0.461106	-1.07354	0.00403722	1	0	1	-9.25071	2.97071	153	0	0	1392.88	0	0	-0.999985	0	0	0	1	11
1710		0.883883	-1.06768	0.452116	-1.05844	0.00401655	1	0	1	-9.2467	2.9667	154	0	0	1400.72	0	0	-0.999985	0	0	0	1	11
1711		0.874826	-1.05274	0.443059	-1.04335	0.00398646	1	0	1	-9.24271	2.96271	155	0	0	1411.96	0	0	-0.999985	0	0	0	1	11
1712		0.865703	-1.03782	0.433936	-1.0283	0.00394644	1	0	0.777778	-9.23876	2.95876	156	0	0	15194.7	0	0	-0.999986	0	0	0	1	11
1713		0.856514	-1.02293	0.424747	-1.01327	0.00389606	1	0	0.555556	-9.23487	2.95487	157	0	0	12514.5	0	0	-0.999986	0	0	0	1	11
1714		0.847261	-1.00807	0.415493	-0.998269	0.00383491	1	0	0.333333	-9.23103	2.95103	158	0	0	4406.2	0	0	-0.999987	0	0	0	1	11
1715		0.837943	-0.993228	0.406176	-0.983291	0.00376267	1	0	0.111111	-9.22727	2.94727	159	0	0	2691.79	0	0	-0.999987	0	0	0	0	11
1716		0.828561	-0.978411	0.396794	-0.968336	-0.0282229	0	1	-0.111111	-9.25549	2.97549	160	0	0	1958.12	0	0	-0.999942	0	0	0	0	11
1717		0.819117	-0.962515	0.387349	-0.952292	-0.00327194	0	1	-0.333333	-9.25877	2.97877	161	0	0	1556.48	0	0	-0.999859	0	0	0	1	11
1718		0.809609	-0.946394	0.377842	-0.936021	-0.00335036	0	1	-0.555556	-9.26212	2.98212	162	0	0	1306.52	0	0	-0.99989	0	0	0	1	11
1719		0.80004	-0.930042	0.368273	-0.919516	-0.00324547	0	1	-0.777778	-9.26536	2.98536	163	0	0	1138.32	0	0	-0.99999	0	0	0	1	11
1720		0.79041	-0.913461	0.358642	-0.902781	-0.00300673	0	1	-1	-9.26837	2.98837	164	0	0	1019.21	0	0	-0.99999	0	0	0	1	11
1721		0.780718	-0.896659	0.348951	-0.885822	-0.00267416	0	1	-1	-9.27104	2.99104	165	0	0	2282.69	0	0	-0.999992	0	0	0	1	11
1722		0.770966	-0.879646	0.339199	-0.868651	-0.00227939	0	1	-1	-9.27332	2.99332	166	0	0	2613.38	0	0	-0.999993	0	0	0	1	11
1723		0.761155	-0.862438	0.329387	-0.851283	-0.00184694	0	1	-1	-9.27517	2.99517	167	0	0	3155.55	0	0	-0.999995	0	0	0	1	11
1724		0.751284	-0.845051	0.319516	-0.833734	-0.00139542	0	1	-0.777778	-9.27656	2.99656	168	0	0	4084.36	0	0	-0.999997	0	0	0	1	11
1725		0.741354	-0.827504	0.309587	-0.816023	-0.000938723	0	1	-0.555556	-9.2775	2.9975	169	0	0	5899.03	0	0	-0.999998	0	0	0	1	11
1726		0.731366	-0.809814	0.299599	-0.798168	-0.00048697	0	1	-0.333333	-9.27799	2.99799	170	0	0	10722.1	0	0	-0.999999	0	0	0	1	11
1727		0.72132	-0.792002	0.289553	-0.780189	-4.73685e-05	0	1	-0.111111	-9.27804	2.99804	171	0	0	56245.9	0	0	-1	0	0	0	0	11
1728		0.711217	-0.774085	0.279449	-0.762106	0.000375112	1	0	0.111111	-9.27766	2.99766	172	0	0	17949.3	0	0	-1	0	0	0	0	11
1729		0.701056	-0.756084	0.269289	-0.743937	0.000777194	1	0	0.333333	-9.27688	2.99688	173	0	0	7914.23	0	0	-1	0	0	0	1	11
1730		0.690839	-0.738015	0.259072	-0.725699	0.00115686	1	0	0.555556	-9.27573	2.99573	174	0	0	5165.91	0	0	-0.999999	0	0	0	1	11
1731		0.680566	-0.719895	0.248799	-0.707411	0.00151303	1	0	0.777778	-9.27421	2.99421	175	0	0	3890.73	0	0	-0.999999	0	0	0	1	11
1732		0.670237	-0.701742	0.238469	-0.689089	0.00184528	1	0	1	-9.27237	2.99237	176	0	0	3159.65	0	0	-0.999998	0	0	0	1	11
1733		0.659852	-0.68357	0.228085	-0.670747	0.00215365	1	0	1	-9.27022	2.99022	177	0	0	2688.84	0	0	-0.999997	0	0	0	1	11
1734		0.649412	-0.665392	0.217645	-0.6524	0.00243852	1	0	1	-9.26778	2.98778	178	0	0	2362.5	0	0	-0.999996	0	0	0	1	11
1735		0.638918	-0.647222	0.20715	-0.634061	0.00270049	1	0	1	-9.26508	2.98508	179	0	0	2124.57	0	0	-0.999994	0	0	0	1	11
1736		0.628369	-0.629072	0.196601	-0.615741	0.00294038	1	0	1	-9.26214	2.98214	180	0	0	1944.63	0	0	-0.999993	0	0	0	1	11
1737		0.617766	-0.610952	0.185998	-0.597453	0.00315923	1	0	1	-9.25898	2.97898	181	0	0	1804.76	0	0	-0.999992	0	0	0	1	11
1738		0.607109	-0.592873	0.175342	-0.579205	0.00335818	1	0	1	-9.25562	2.97562	182	0	0	1693.73	0	0	-0.999991	0	0	0	1	11
1739		0.596399	-0.574842	0.164631	-0.561006	0.00353842	1	0	1	-9.25208	2.97208	183	0	0	1604.12	0	0	-0.99999	0	0	0	1	11
1740		0.585636	-0.556868	0.153869	-0.542864	0.00370113	1	0	1	-9.24838	2.96838	184	0	0	1530.85	0	0	-0.999989	0	0	0	1	11
1741		0.57482	-0.538958	0.143053	-0.524787	0.00384748	1	0	1	-9.24453	2.96453	185	0	0	1470.33	0	0	-0.999988	0	0	0	1	11
1742		0.563953	-0.521118	0.132186	-0.506781	0.00397858	1	0	1	-9.24055	2.96055	186	0	0	1419.92	0	0	-0.999987	0	0	0	1	11
1743		0.553034	-0.503353	0.121267	-0.488851	0.00409552	1	0	1	-9.23646	2.95646	187	0	0	1377.66	0	0	-0.999986	0	0	0	1	11
1744		0.542064	-0.485669	0.110297	-0.471002	0.00419938	1	0	1	-9.23226	2.95226	188	0	0	1342.06	0	0	-0.999985	0	0	0	1	11
1745		0.531043	-0.468069	0.0992757	-0.453238	0.00429125	1	0	1	-9.22797	2.94797	189	0	0	1311.94	0	0	-0.999985	0	0	0	1	11
1746		0.519972	-0.450557	0.0882047	-0.435562	0.00437227	1	0	1	-9.2236	2.9436	190	0	0	1286.39	0	0	-0.999984	0	0	0	1	11
1747		0.508851	-0.433136	0.0770839	-0.417979	0.00444352	1	0	1	-9.21915	2.93915	191	0	0	1264.68	0	0	-0.999984	0	0	0	1	11
1748		0.497681	-0.415809	0.0659137	-0.40049	0.00450598	1	0	1	-9.21465	2.93465	192	0	0	1246.2	0	0	-0.999983	0	0	0	1	11
1749		0.486462	-0.398577	0.0546947	-0.383098	0.00456054	1	0	1	-9.21009	2.93009	193	0	0	1230.47	0	0	-0.999983	0	0	0	1	11
1750		0.475195	-0.381444	0.0434272	-0.365805	0.00460802	1	0	1	-9.20548	2.92548	194	0	0	1217.09	0	0	-0.999983	0	0	0	1	11
1751		0.463879	-0.364409	0.0321116	-0.348611	0.00464912	1	0	1	-9.20083	2.92083	195	0	0	1205.72	0	0	-0.999982	0	0	0	1	11
1752		0.452516	-0.347474	0.0207483	-0.331518	0.0046845	1	0	1	-9.19614	2.91614	196	0	0	1196.1	0	0	-0.999982	0	0	0	1	11
1753		0.441105	-0.33064	0.00933759	-0.314528	0.0047147	1	0	1	-9.19143	2.91143	197	0	0	1187.99	0	0	-0.999982	0	0	0	1	11
1754		0.429647	-0.313908	-0.00212019	-0.29764	0.00474021	1	0	1	-9.18669	2.90669	198	0	0	1181.23	0	0	-0.999982	0	0	0	1	11
1755		0.418143	-0.297278	-0.0136248	-0.280854	0.00476145	1	0	1	-9.18193	2.90193	199	0	0	1175.64	0	0	-0.999982	0	0	0	1	11
1756		0.406591	-0.280749	-0.0251759	-0.264172	0.00477877	1	0	1	-9.17715	2.89715	200	0	0	1171.11	0	0	-0.999982	0	0	0	1	11
1757		0.394994	-0.264323	-0.0367733	-0.247592	0.00479247	1	0	1	-9.17236	2.89236	201	0	0	1167.52	0	0	-0.999982	0	0	0	1	11
1758		0.383351	-0.247999	-0.0484167	-0.231116	0.00480285	1	0	1	-9.16755	2.88755	202	0	0	1164.78	0	0	-0.999982	0	0	0	1	11
1759		0.371661	-0.231776	-0.0601061	-0.214742	0.00481013	1	0	1	-9.16274	2.88274	203	0	0	1162.82	0	0	-0.999982	0	0	0	1	11
1760		0.359926	-0.215654	-0.0718411	-0.19847	0.00481456	1	0	1	-9.15793	2.87793	204	0	0	1161.57	0	0	-0.999982	0	0	0	1	11
1761		0.348146	-0.199633	-0.0836216	-0.1823	0.00481636	1	0	1	-9.15311	2.87311	205	0	0	1160.96	0	0	-0.999982	0	0	0	1	11
1762		0.33632	-0.183712	-0.0954475	-0.16623	0.00481574	1	0	1	-9.1483	2.8683	206	0	0	1160.95	0	0	-0.999982	0	0	0	1	11
1763		0.324449	-0.167891	-0.107319	-0.150261	0.0048129	1	0	1	-9.14348	2.86348	207	0	0	1161.48	0	0	-0.999982	0	0	0	1	11
1764		0.312533	-0.152167	-0.119235	-0.134391	0.00480803	1	0	1	-9.13868	2.85868	208	0	0	1162.52	0	0	-0.999982	0	0	0	1	11
1765		0.300572	-0.136542	-0.131196	-0.11862	0.00480131	1	0	1	-9.13387	2.85387	209	0	0	1164.01	0	0	-0.999983	0	0	0	1	11
1766		0.288566	-0.121014	-0.143202	-0.102947	0.00479292	1	0	1	-9.12908	2.84908	210	0	0	1165.91	0	0	-0.999983	0	0	0	1	11
1767		0.276515	-0.105581	-0.155252	-0.0873711	0.00478302	1	0	1	-9.1243	2.8443	211	0	0	1168.21	0	0	-0.999983	0	0	0	1	11
1768		0.26442	-0.0902441	-0.167347	-0.0718909	0.00477176	1	0	1	-9.11953	2.83953	212	0	0	1170.85	0	0	-0.999983	0	0	0	1	11
1769		0.252281	-0.0750009	-0.179486	-0.0565057	0.00475928	1	0	1	-9.11477	2.83477	213	0	0	1173.82	0	0	-0.999983	0	0	0	1	11
1770		0.240097	-0.059851	-0.19167	-0.0412146	0.0047457	1	0	1	-9.11002	2.83002	214	0	0	1177.08	0	0	-0.999983	0	0	0	1	11
1771		0.227869	-0.0447933	-0.203898	-0.0260165	0.00473116	1	0	1	-9.10529	2.82529	215	0	0	1180.61	0	0	-0.999983	0	0	0	1	11
1772		0.215597	-0.0298269	-0.21617	-0.0109106	0.00471575	1	0	1	-9.10057	2.82057	216	0	0	1184.38	0	0	-0.999984	0	0	0	1	11
1773		0.203281	-0.0149506	-0.228486	0.00410432	0.00469959	1	0	1	-9.09587	2.81587	217	0	0	1188.38	0	0	-0.999984	0	0	0	1	11
1774		0.190921	-0.000163675	-0.240846	0.0190291	0.00468276	1	0	1	-9.09119	2.81119	218	0	0	1192.58	0	0	-0.999984	0	0	0	1	11
1775		0.178518	0.014535	-0.25325	0.0338648	0.00466534	1	0	1	-9.08653	2.80653	219	0	0	1196.97	0	0	-0.999984	0	0	0	1	11
1776		0.16607	0.0291464	-0.265697	0.0486123	0.00464741	1	0	1	-9.08188	2.80188	220	0	0	1201.52	0	0	-0.999984	0	0	0	1	11
1777		0.153579	0.0436714	-0.278188	0.0632727	0.00462905	1	0	1	-9.07725	2.79725	221	0	0	1206.22	0	0	-0.999984	0	0	0	1	11
1778		0.141045	0.058111	-0.290722	0.0778469	0.00461034	1	0	1	-9.07264	2.79264	222	0	0	1211.04	0	0	-0.999985	0	0	0	1	11
1779		0.128467	0.0724661	-0.3033	0.0923359	0.00459136	1	0	1	-9.06805	2.78805	223	0	0	1215.98	0	0	-0.999985	0	0	0	1	11
1780		0.115846	0.0867377	-0.315921	0.10674	0.00457218	1	0	1	-9.06348	2.78348	224	0	0	1221.01	0	0	-0.999985	0	0	0	1	11
1781		0.103182	0.100927	-0.328585	0.121062	0.00455289	1	0	1	-9.05892	2.77892	225	0	0	1226.11	0	0	-0.999985	0	0	0	1	11
1782		0.0904751	0.115034	-0.341292	0.1353	0.00453358	1	0	1	-9.05439	2.77439	226	0	0	1231.26	0	0	-0.999985	0	0	0	1	11
1783		0.0777252	0.12906	-0.354042	0.149457	0.00451432	1	0	1	-9.04988	2.76988	227	0	0	1236.44	0	0	-0.999985	0	0	0	1	11
1784		0.0649325	0.143006	-0.366835	0.163533	0.00449519	1	0	1	-9.04538	2.76538	228	0	0	1241.63	0	0	-0.999986	0	0	0	1	11
1785		0.0520971	0.156873	-0.37967	0.177529	0.00447627	1	0	1	-9.0409	2.7609	229	0	0	1246.81	0	0	-0.999986	0	0	0	1	11
1786		0.0392193	0.170661	-0.392548	0.191446	0.00445763	1	0	1	-9.03645	2.75645	230	0	0	1251.96	0	0	-0.999986	0	0	0	1	11
1787		0.0262991	0.184372	-0.405468	0.205285	0.00443934	1	0	1	-9.03201	2.75201	231	0	0	1257.07	0	0	-0.999986	0	0	0	1	11
1788		0.0133366	0.198006	-0.418431	0.219045	0.00442146	1	0	1	-9.02759	2.74759	232	0	0	1262.1	0	0	-0.999986	0	0	0	1	11
1789		0.000331882	0.211563	-0.431435	0.232729	0.00440404	1	0	1	-9.02318	2.74318	233	0	0	1267.06	0	0	-0.999986	0	0	0	1	11
1790		-0.0127148	0.225045	-0.444482	0.246337	0.00438711	1	0	1	-9.01879	2.73879	234	0	0	1271.92	0	0	-0.999986	0	0	0	1	11
1791		-0.0258035	0.238452	-0.457571	0.259869	0.0043707	1	0	1	-9.01442	2.73442	235	0	0	1276.68	0	0	-0.999987	0	0	0	1	11
1792		-0.0389341	0.251784	-0.470701	0.273326	0.00435482	1	0	1	-9.01007	2.73007	236	0	0	1281.33	0	0	-0.999987	0	0	0	1	11
1793		-0.0521063	0.265044	-0.483874	0.286708	0.00433947	1	0	1	-9.00573	2.72573	237	0	0	1285.87	0	0	-0.999987	0	0	0	1	11
1794		-0.0653203	0.27823	-0.497088	0.300017	0.00432465	1	0	1	-9.0014	2.7214	238	0	0	1290.28	0	0	-0.999987	0	0	0	1	11
1795		-0.0785758	0.291343	-0.510343	0.313253	0.00431035	1	0	1	-8.99709	2.71709	239	0	0	1294.57	0	0	-0.999987	0	0	0	1	11
1796		-0.0918728	0.304385	-0.52364	0.326417	0.00429656	1	0	1	-8.9928	2.7128	240	0	0	1298.74	0	0	-0.999987	0	0	0	1	11
1797		-0.105211	0.317356	-0.536979	0.339508	0.00428326	1	0	1	-8.98851	2.70851	241	0	0	1302.78	0	0	-0.999987	0	0	0	1	11
1798		-0.118591	0.330255	-0.550358	0.352528	0.00427043	1	0	1	-8.98424	2.70424	242	0	0	1306.71	0	0	-0.999987	0	0	0	1	11
1799		-0.132012	0.343085	-0.563779	0.365477	0.00425807	1	0	1	-8.97999	2.69999	243	0	0	1310.52	0	0	-0.999987	0	0	0	1	11
1800		-0.145474	0.355844	-0.577242	0.378355	0.00424615	1	0	1	-8.97574	2.69574	244	0	0	1314.21	0	0	-0.999987	0	0	0	1	11
1801		-0.158978	0.368534	-0.590745	0.391164	0.00423467	1	0	1	-8.97151	2.69151	245	0	0	1317.78	0	0	-0.999987	0	0	0	1	11
1802		-0.172522	0.381155	-0.60429	0.403902	0.00422361	1	0	1	-8.96728	2.68728	246	0	0	1321.25	0	0	-0.999987	0	0	0	1	11
1803		-0.186108	0.393708	-0.617875	0.416572	0.00421295	1	0	1	-8.96307	2.68307	247	0	0	1324.6	0	0	-0.999987	0	0	0	1	11
1804		-0.199734	0.406193	-0.631501	0.429173	0.00420269	1	0	1	-8.95887	2.67887	248	0	0	1327.84	0	0	-0.999988	0	0	0	1	11
1805		-0.213401	0.41861	-0.645168	0.441706	0.00419282	1	0	1	-8.95467	2.67467	249	0	0	1330.97	0	0	-0.999988	0	0	0	1	11
1806		-0.227109	0.430959	-0.658877	0.45417	0.00418333	1	0	1	-8.95049	2.67049	250	0	0	1334	0	0	-0.999988	0	0	0	1	11
1807		-0.240858	0.443242	-0.672625	0.466567	0.00417422	1	0	1	-8.94632	2.66632	251	0	0	1336.91	0	0	-0.999988	0	0	0	1	11
1808		-0.254647	0.455457	-0.686415	0.478897	0.00416547	1	0	1	-8.94215	2.66215	252	0	0	1339.73	0	0	-0.999988	0	0	0	1	11
1809		-0.268477	0.467607	-0.700245	0.49116	0.00415709	1	0	1	-8.93799	2.65799	253	0	0	1342.43	0	0	-0.999988	0	0	0	1	11
1810		-0.282348	0.47969	-0.714115	0.503356	0.00414907	1	0	1	-8.93384	2.65384	254	0	0	1345.03	0	0	-0.999988	0	0	0	1	11
1811		-0.296259	0.491708	-0.728026	0.515485	0.0041414	1	0	1	-8.9297	2.6497	255	0	0	1347.53	0	0	-0.999988	0	0	0	1	11
1812		-0.310211	0.50366	-0.741978	0.527549	0.00413409	1	0	1	-8.92557	2.64557	256	0	0	1349.92	0	0	-0.999988	0	0	0	1	11
1813		-0.324203	0.515547	-0.75597	0.539547	0.00412712	1	0	1	-8.92144	2.64144	257	0	0	1352.2	0	0	-0.999988	0	0	0	1	11
1814		-0.338235	0.527369	-0.770002	0.551479	0.00412049	1	0	1	-8.91732	2.63732	258	0	0	1354.39	0	0	-0.999988	0	0	0	1	11
1815		-0.352308	0.539127	-0.784075	0.563346	0.00411419	1	0	1	-8.91321	2.63321	259	0	0	1356.48	0	0	-0.999988	0	0	0	1	11
1816		-0.36642	0.55082	-0.798188	0.575148	0.00410821	1	0	1	-8.9091	2.6291	260	0	0	1358.47	0	0	-0.999988	0	0	0	1	11
1817		-0.380573	0.562448	-0.812341	0.586885	0.00410252	1	0	1	-8.905	2.625	261	0	0	1360.37	0	0	-0.999988	0	0	0	1	11
1818		-0.394767	0.574013	-0.826534	0.598558	0.00409712	1	0	1	-8.9009	2.6209	262	0	0	1362.18	0	0	-0.999988	0	0	0	1	11
1819		-0.409	0.585514	-0.840767	0.610166	0.00409198	1	0	1	-8.89681	2.61681	263	0	0	1363.92	0	0	-0.999988	0	0	0	1	11
1820		-0.423274	0.596951	-0.855041	0.62171	0.00408709	1	0	1	-8.89272	2.61272	264	0	0	1365.57	0	0	-0.999988	0	0	0	1	11
1821		-0.437587	0.608325	-0.869355	0.633189	0.00408241	1	0	1	-8.88864	2.60864	265	0	0	1367.16	0	0	-0.999988	0	0	0	1	11
1822		-0.451941	0.619636	-0.883708	0.644605	0.00407794	1	0	1	-8.88456	2.60456	266	0	0	1368.68	0	0	-0.999988	0	0	0	1	11
1823		-0.466335	0.630883	-0.898102	0.655958	0.00407365	1	0	1	-8.88049	2.60049	267	0	0	1370.14	0	0	-0.999988	0	0	0	1	11
1824		-0.480769	0.642068	-0.912536	0.667247	0.00406953	1	0	1	-8.87642	2.59642	268	0	0	1371.54	0	0	-0.999988	0	0	0	1	11
1825		-0.495242	0.653189	-0.92701	0.678472	0.00406555	1	0	1	-8.87235	2.59235	269	0	0	1372.89	0	0	-0.999988	0	0	0	1	11
1826		-0.509756	0.664249	-0.941523	0.689634	0.00406172	1	0	1	-8.86829	2.58829	270	0	0	1374.19	0	0	-0.999988	0	0	0	1	11
1827		-0.52431	0.675245	-0.956077	0.700734	0.00405802	1	0	1	-8.86423	2.58423	271	0	0	1375.45	0	0	-0.999988	0	0	0	1	11
1828		-0.538903	0.68618	-0.970671	0.71177	0.00405446	1	0	1	-8.86018	2.58018	272	0	0	1376.66	0	0	-0.999988	0	0	0	1	11
1829		-0.553537	0.697052	-0.985304	0.722743	0.00405102	1	0	1	-8.85613	2.57613	273	0	0	1377.82	0	0	-0.999988	0	0	0	1	11
1830		-0.568211	0.707862	-0.999978	0.733654	0.00404772	1	0	1	-8.85208	2.57208	274	0	0	1378.94	0	0	-0.999988	0	0	0	1	11
1831		-0.582924	0.71861	-1.01469	0.744503	0.00404457	1	0	1	-8.84803	2.56803	275	0	0	1380	0	0	-0.999987	0	0	0	1	11
1832		-0.597677	0.729297	-1.02944	0.755289	0.00404157	1	0	1	-8.84399	2.56399	276	0	0	1381.01	0	0	-0.999987	0	0	0	1	11
1833		-0.61247	0.739921	-1.04424	0.766012	0.00403873	1	0	1	-8.83995	2.55995	277	0	0	1381.96	0	0	-0.999987	0	0	0	1	11
1834		-0.627303	0.750484	-1.05907	0.776674	0.00403608	1	0	1	-8.83592	2.55592	278	0	0	1382.85	0	0	-0.999987	0	0	0	1	11
1835		-0.642176	0.760986	-1.07394	0.787273	0.00403362	1	0	1	-8.83188	2.55188	279	0	0	1383.68	0	0	-0.999987	0	0	0	1	11
1836		-0.657089	0.771425	-1.08886	0.79781	0.00403138	1	0	1	-8.82785	2.54785	280	0	0	1384.43	0	0	-0.999987	0	0	0	1	11
1837		-0.672042	0.781804	-1.10381	0.808285	0.00402937	1	0	1	-8.82382	2.54382	281	0	0	1385.1	0	0	-0.999987	0	0	0	1	11
1838		-0.687035	0.792121	-1.1188	0.818699	0.00402762	1	0	1	-8.81979	2.53979	282	0	0	1385.68	0	0	-0.999987	0	0	0	1	11
1839		-0.702067	0.802378	-1.13383	0.829051	0.00402613	1	0	1	-8.81577	2.53577	283	0	0	1386.18	0	0	-0.999987	0	0	0	1	11
1840		-0.71714	0.812573	-1.14891	0.839341	0.00402492	1	0	1	-8.81174	2.53174	284	0	0	1386.58	0	0	-0.999987	0	0	0	1	11
1841		-0.732252	0.822706	-1.16402	0.849569	0.00402401	1	0	1	-8.80772	2.52772	285	0	0	1386.88	0	0	-0.999987	0	0	0	1	11
1842		-0.747405	0.832779	-1.17917	0.859736	0.00402341	1	0	1	-8.8037	2.5237	286	0	0	1387.08	0	0	-0.999987	0	0	0	1	11
1843		-0.762598	0.842791	-1.19436	0.869841	0.00402311	1	0	1	-8.79967	2.51967	287	0	0	1387.18	0	0	-0.999987	0	0	0	1	11
1844		-0.77783	0.852743	-1.2096	0.879885	0.00402313	1	0	1	-8.79565	2.51565	288	0	0	1387.17	0	0	-0.999987	0	0	0	1	11
1845		-0.793104	0.862633	-1.22487	0.889868	0.00402347	1	0	1	-8.79163	2.51163	289	0	0	1387.05	0	0	-0.999987	0	0	0	1	11
1846		-0.808417	0.872463	-1.24018	0.899789	0.00402412	1	0	1	-8.7876	2.5076	290	0	0	1386.82	0	0	-0.999986	0	0	0	1	11
1847		-0.823771	0.882231	-1.25554	0.909649	0.0040251	1	0	1	-8.78358	2.50358	291	0	0	1386.49	0	0	-0.999986	0	0	0	1	11
1848		-0.839165	0.89194	-1.27093	0.919447	0.00402641	1	0	1	-8.77955	2.49955	292	0	0	1386.08	0	0	-0.999986	0	0	0	1	11
1849		-0.8546	0.901587	-1.28637	0.929185	0.00402805	1	0	1	-8.77552	2.49552	293	0	0	1385.61	0	0	-0.999986	0	0	0	1	11
1850		-0.870076	0.911174	-1.30184	0.938861	0.00402997	1	0	1	-8.77149	2.49149	294	0	0	1385.07	0	0	-0.999986	0	0	0	1	11
1851		-0.885593	0.9207	-1.31736	0.948476	0.00403191	1	0	1	-8.76746	2.48746	295	0	0	1384.5	0	0	-0.999986	0	0	0	1	11
1852		-0.901151	0.930166	-1.33292	0.95803	0.0040338	1	0	1	-8.76343	2.48343	296	0	0	1383.9	0	0	-0.999986	0	0	0	1	11
1853		-0.91675	0.939571	-1.34852	0.967523	0.00403564	1	0	1	-8.75939	2.47939	297	0	0	1383.29	0	0	-0.999986	0	0	0	1	11
1854		-0.93239	0.948915	-1.36416	0.976954	0.00403742	1	0	1	-8.75535	2.47535	298	0	0	1382.67	0	0	-0.999985	0	0	0	1	11
1855		-0.948072	0.958199	-1.37984	0.986325	0.00403917	1	0	1	-8.75132	2.47132	299	0	0	1382.08	0	0	-0.999985	0	0	0	1	11
1856		-0.963796	0.967423	-1.39556	0.995634	0.00404086	1	0	1	-8.74727	2.46727	300	0	0	1381.49	0	0	-0.999985	0	0	0	1	11
1857		-0.979561	0.976586	-1.41133	1.00488	0.00404251	1	0	1	-8.74323	2.46323	301	0	0	1380.93	0	0	-0.999985	0	0	0	1	11
1858		-0.995369	0.985688	-1.42714	1.01407	0.00404412	1	0	1	-8.73919	2.45919	302	0	0	1380.38	0	0	-0.999985	0	0	0	1	11
1859		-1.01122	0.99473	-1.44299	1.0232	0.00404569	1	0	1	-8.73514	2.45514	303	0	0	1379.84	0	0	-0.999985	0	0	0	1	11
1860		-1.02711	1.00371	-1.45888	1.03226	0.00404721	1	0	1	-8.73109	2.45109	304	0	0	1379.31	0	0	-0.999985	0	0	0	1	11
1861		-1.04304	1.01263	-1.47481	1.04127	0.0040487	1	0	1	-8.72705	2.44705	305	0	0	1378.77	0	0	-0.999984	0	0	0	1	11
1862		-1.05902	1.02149	-1.49079	1.05021	0.00405015	1	0	1	-8.723	2.443	306	0	0	1378.21	0	0	-0.999984	0	0	0	1	11
1863		-1.07504	1.03029	-1.50681	1.05909	0.00405161	1	0	1	-8.71894	2.43894	307	0	0	1377.65	0	0	-0.999984	0	0	0	1	11
1864		-1.0911	1.03903	-1.52287	1.06791	0.00405328	1	0	1	-8.71489	2.43489	308	0	0	1377.06	0	0	-0.999984	0	0	0	1	11
1865		-1.10721	1.04771	-1.53897	1.07667	0.00405513	1	0	1	-8.71084	2.43084	309	0	0	1376.46	0	0	-0.999984	0	0	0	1	11
1866		-1.12336	1.05633	-1.55512	1.08537	0.00405709	1	0	1	-8.70678	2.42678	310	0	0	1375.85	0	0	-0.999984	0	0	0	1	11
1867		-1.13955	1.06489	-1.57131	1.09401	0.0040591	1	0	1	-8.70272	2.42272	311	0	0	1375.21	0	0	-0.999983	0	0	0	1	11
1868		-1.15578	1.07338	-1.58755	1.10258	0.00406113	1	0	1	-8.69866	2.41866	312	0	0	1374.57	0	0	-0.999983	0	0	0	1	11
1869		-1.17206	1.08182	-1.60383	1.1111	0.00406313	1	0	1	-8.6946	2.4146	313	0	0	1373.92	0	0	-0.999983	0	0	0	1	11
1870		-1.18838	1.09019	-1.62015	1.11955	0.00406509	1	0	1	-8.69053	2.41053	314	0	0	1373.29	0	0	-0.999983	0	0	0	1	11
1871		-1.20475	1.09851	-1.63652	1.12794	0.00406699	1	0	1	-8.68646	2.40646	315	0	0	1372.68	0	0	-0.999983	0	0	0	1	11
1872		-1.22116	1.10676	-1.65293	1.13627	0.0040688	1	0	1	-8.68239	2.40239	316	0	0	1372.11	0	0	-0.999982	0	0	0	1	11
1873		-1.23761	1.11495	-1.66938	1.14454	0.00407046	1	0	1	-8.67832	2.39832	317	0	0	1371.58	0	0	-0.999982	0	0	0	1	11
1874		-1.25411	1.12308	-1.68588	1.15275	0.00407194	1	0	1	-8.67425	2.39425	318	0	0	1371.09	0	0	-0.999982	0	0	0	1	11
1875		-1.27066	1.13115	-1.70243	1.16089	0.00407323	1	0	1	-8.67018	2.39018	319	0	0	1370.66	0	0	-0.999982	0	0	0	1	11
1876		-1.28725	1.13916	-1.71901	1.16898	0.00407435	1	0	1	-8.6661	2.3861	320	0	0	1370.27	0	0	-0.999981	0	0	0	1	11
1877		-1.30388	1.14711	-1.73565	1.177	0.00407531	1	0	1	-8.66203	2.38203	321	0	0	1369.93	0	0	-0.999981	0	0	0	1	11
1878		-1.32056	1.155	-1.75233	1.18496	0.00407611	1	0	1	-8.65795	2.37795	322	0	0	1369.63	0	0	-0.999981	0	0	0	1	11
1879		-1.33728	1.16282	-1.76905	1.19286	0.00407678	1	0	1	-8.65388	2.37388	323	0	0	1369.36	0	0	-0.999981	0	0	0	1	11
1880		-1.35405	1.17059	-1.78582	1.20069	0.00407736	1	0	1	-8.6498	2.3698	324	0	0	1369.11	0	0	-0.99998	0	0	0	1	11
1881		-1.37087	1.17829	-1.80264	1.20847	0.00407793	1	0	1	-8.64572	2.36572	325	0	0	1368.88	0	0	-0.99998	0	0	0	1	11
1882		-1.38773	1.18593	-1.8195	1.21618	0.00407853	1	0	1	-8.64164	2.36164	326	0	0	1368.65	0	0	-0.99998	0	0	0	1	11
1883		-1.40464	1.19351	-1.8364	1.22383	0.00407917	1	0	1	-8.63756	2.35756	327	0	0	1368.43	0	0	-0.99998	0	0	0	1	11
1884		-1.42159	1.20103	-1.85336	1.23141	0.00407987	1	0	1	-8.63348	2.35348	328	0	0	1368.22	0	0	-0.999979	0	0	0	1	11
1885		-1.43859	1.20848	-1.87036	1.23894	0.00408059	1	0	1	-8.6294	2.3494	329	0	0	1368	0	0	-0.999979	0	0	0	1	11
1886		-1.45563	1.21587	-1.8874	1.2464	0.00408129	1	0	1	-8.62532	2.34532	330	0	0	1367.79	0	0	-0.999979	0	0	0	1	11
1887		-1.47272	1.2232	-1.90449	1.2538	0.00408196	1	0	1	-8.62124	2.34124	331	0	0	1367.57	0	0	-0.999978	0	0	0	1	11
1888		-1.48986	1.23047	-1.92163	1.26114	0.00408259	1	0	1	-8.61716	2.33716	332	0	0	1367.37	0	0	-0.999978	0	0	0	1	11
1889		-1.50704	1.23768	-1.93881	1.26841	0.00408317	1	0	1	-8.61307	2.33307	333	0	0	1367.17	0	0	-0.999978	0	0	0	1	11
1890		-1.52428	1.24482	-1.95604	1.27562	0.00408372	1	0	1	-8.60899	2.32899	334	0	0	1366.99	0	0	-0.999977	0	0	0	1	11
1891		-1.54155	1.2519	-1.97332	1.28277	0.00408422	1	0	1	-8.60491	2.32491	335	0	0	1366.82	0	0	-0.999977	0	0	0	1	11
1892		-1.55888	1.25892	-1.99064	1.28985	0.00408468	1	0	1	-8.60082	2.32082	336	0	0	1366.66	0	0	-0.999976	0	0	0	1	11
1893		-1.57625	1.26588	-2.00801	1.29687	0.00408511	1	0	1	-8.59674	2.31674	337	0	0	1366.5	0	0	-0.999976	0	0	0	1	11
1894		-1.59366	1.27277	-2.02543	1.30383	0.00408553	1	0	1	-8.59265	2.31265	338	0	0	1366.36	0	0	-0.999976	0	0	0	1	11
1895		-1.61113	1.2796	-2.0429	1.31072	0.00408593	1	0	1	-8.58856	2.30856	339	0	0	1366.22	0	0	-0.999975	0	0	0	1	11
1896		-1.62864	1.28636	-2.06041	1.31755	0.00408633	1	0	1	-8.58448	2.30448	340	0	0	1366.09	0	0	-0.999975	0	0	0	1	11
1897		-1.6462	1.29307	-2.07796	1.32431	0.00408672	1	0	1	-8.58039	2.30039	341	0	0	1365.96	0	0	-0.999974	0	0	0	1	11
1898		-1.6638	1.2997	-2.09557	1.33101	0.00408709	1	0	1	-8.5763	2.2963	342	0	0	1365.85	0	0	-0.999974	0	0	0	1	11
1899		-1.68146	1.30628	-2.11322	1.33765	0.00408743	1	0	1	-8.57222	2.29222	343	0	0	1365.74	0	0	-0.999973	0	0	0	1	11
1900		-1.69916	1.31279	-2.13092	1.34422	0.00408774	1	0	1	-8.56813	2.28813	344	0	0	1365.63	0	0	-0.999973	0	0	0	1	11
1901		-1.7169	1.31924	-2.14867	1.35073	0.00408802	1	0	1	-8.56404	2.28404	345	0	0	1365.53	0	0	-0.999972	0	0	0	1	11
1902		-1.7347	1.32562	-2.16647	1.35717	0.00408828	1	0	1	-8.55995	2.27995	346	0	0	1365.44	0	0	-0.999972	0	0	0	1	11
1903		-1.75254	1.33193	-2.18431	1.36354	0.00408851	1	0	1	-8.55586	2.27586	347	0	0	1365.35	0	0	-0.999971	0	0	0	1	11
1904		-1.77043	1.33819	-2.2022	1.36985	0.00408873	1	0	1	-8.55178	2.27178	348	0	0	1365.26	0	0	-0.999971	0	0	0	1	11
1905		-1.78837	1.34437	-2.22014	1.3761	0.00408896	1	0	1	-8.54769	2.26769	349	0	0	1365.15	0	0	-0.99997	0	0	0	1	11
1906		-1.80635	1.3505	-2.23812	1.38228	0.0040892	1	0	1	-8.5436	2.2636	350	0	0	1365.02	0	0	-0.999969	0	0	0	1	11
1907		-1.82438	1.35655	-2.25615	1.38839	0.0040895	1	0	1	-8.53951	2.25951	351	0	0	1364.87	0	0	-0.999969	0	0	0	1	11
1908		-1.84246	1.36254	-2.27423	1.39444	0.00408996	1	0	1	-8.53542	2.25542	352	0	0	1364.68	0	0	-0.999968	0	0	0	1	11
1909		-1.86059	1.36847	-2.29236	1.40042	0.00409068	1	0	1	-8.53133	2.25133	353	0	0	1364.47	0	0	-0.999967	0	0	0	1	11
1910		-1.87877	1.37433	-2.31053	1.40633	0.00409151	1	0	1	-8.52724	2.24724	354	0	0	1364.22	0	0	-0.999967	0	0	0	1	11
1911		-1.89699	1.38012	-2.32875	1.41218	0.00409243	1	0	1	-8.52314	2.24314	355	0	0	1363.93	0	0	-0.999966	0	0	0	1	11
1912		-1.91526	1.38585	-2.34702	1.41796	0.00409343	1	0	1	-8.51905	2.23905	356	0	0	1363.6	0	0	-0.999965	0	0	0	1	11
1913		-1.93357	1.39151	-2.36534	1.42367	0.00409451	1	0	1	-8.51496	2.23496	357	0	0	1363.23	0	0	-0.999964	0	0	0	1	11
1914		-1.95194	1.3971	-2.3837	1.42931	0.00409566	1	0	1	-8.51086	2.23086	358	0	0	1362.81	0	0	-0.999963	0	0	0	1	11
1915		-1.97035	1.40262	-2.40212	1.43489	0.00409692	1	0	1	-8.50676	2.22676	359	0	0	1362.36	0	0	-0.999962	0	0	0	1	11
1916		-1.98881	1.40808	-2.42058	1.4404	0.00409842	1	0	1	-8.50266	2.22266	360	0	0	1361.87	0	0	-0.999961	0	0	0	1	11
1917		-2.00731	1.41347	-2.43908	1.44584	0.00410011	1	0	1	-8.49856	2.21856	361	0	0	1361.35	0	0	-0.99996	0	0	0	1	11
1918		-2.02587	1.41879	-2.45764	1.45121	0.00410194	1	0	1	-8.49446	2.21446	362	0	0	1360.8	0	0	-0.999959	0	0	0	1	11
1919		-2.04447	1.42405	-2.47624	1.45652	0.00410382	1	0	1	-8.49036	2.21036	363	0	0	1360.24	0	0	-0.999958	0	0	0	1	11
1920		-2.06312	1.42923	-2.49489	1.46175	0.00410569	1	0	1	-8.48625	2.20625	364	0	0	1359.66	0	0	-0.999957	0	0	0	1	11
1921		-2.08182	1.43435	-2.51358	1.46691	0.00410751	1	0	1	-8.48215	2.20215	365	0	0	1359.07	0	0	-0.999956	0	0	0	1	11
1922		-2.10056	1.4394	-2.53233	1.47201	0.00410929	1	0	1	-8.47804	2.19804	366	0	0	1358.49	0	0	-0.999955	0	0	0	1	11
1923		-2.11935	1.44438	-2.55112	1.47703	0.00411101	1	0	1	-8.47393	2.19393	367	0	0	1357.91	0	0	-0.999953	0	0	0	1	11
1924		-2.1382	1.44929	-2.56996	1.48199	0.0041127	1	0	1	-8.46981	2.18981	368	0	0	1357.34	0	0	-0.999952	0	0	0	1	11
1925		-2.15708	1.45413	-2.58885	1.48687	0.00411437	1	0	1	-8.4657	2.1857	369	0	0	1356.77	0	0	-0.99995	0	0	0	1	11
1926		-2.17602	1.4589	-2.60779	1.49169	0.00411603	1	0	1	-8.46158	2.18158	370	0	0	1356.2	0	0	-0.999949	0	0	0	1	11
1927		-2.195	1.46359	-2.62677	1.49643	0.00411768	1	0	1	-8.45746	2.17746	371	0	0	1355.62	0	0	-0.999947	0	0	0	1	11
1928		-2.21403	1.46822	-2.6458	1.5011	0.00411935	1	0	1	-8.45335	2.17335	372	0	0	1355.02	0	0	-0.999946	0	0	0	1	11
1929		-2.23311	1.47278	-2.66488	1.5057	0.00412109	1	0	1	-8.44922	2.16922	373	0	0	1354.39	0	0	-0.999944	0	0	0	1	11
1930		-2.25224	1.47727	-2.68401	1.51023	0.00412303	1	0	1	-8.4451	2.1651	374	0	0	1353.72	0	0	-0.999942	0	0	0	1	11
1931		-2.27141	1.48168	-2.70318	1.51469	0.00412517	1	0	1	-8.44098	2.16098	375	0	0	1353.03	0	0	-0.99994	0	0	0	1	11
1932		-2.29063	1.48603	-2.7224	1.51907	0.00412751	1	0	1	-8.43685	2.15685	376	0	0	1352.3	0	0	-0.999938	0	0	0	1	11
1933		-2.3099	1.4903	-2.74167	1.52338	0.00413004	1	0	1	-8.43272	2.15272	377	0	0	1351.54	0	0	-0.999935	0	0	0	1	11
1934		-2.32922	1.4945	-2.76099	1.52762	0.0041326	1	0	1	-8.42859	2.14859	378	0	0	1350.76	0	0	-0.999933	0	0	0	1	11
1935		-2.34859	1.49862	-2.78035	1.53179	0.00413515	1	0	1	-8.42445	2.14445	379	0	0	1349.97	0	0	-0.999931	0	0	0	1	11
1936		-2.368	1.50268	-2.79977	1.53588	0.00413767	1	0	1	-8.42031	2.14031	380	0	0	1349.18	0	0	-0.999928	0	0	0	1	11
1937		-2.38746	1.50666	-2.81923	1.53989	0.00414013	1	0	1	-8.41617	2.13617	381	0	0	1348.39	0	0	-0.999925	0	0	0	1	11
1938		-2.40697	1.51056	-2.83874	1.54384	0.00414251	1	0	1	-8.41203	2.13203	382	0	0	1347.61	0	0	-0.999922	0	0	0	1	11
1939		-2.42653	1.5144	-2.8583	1.54771	0.00414483	1	0	1	-8.40789	2.12789	383	0	0	1346.85	0	0	-0.999919	0	0	0	1	11
1940		-2.44613	1.51815	-2.8779	1.5515	0.00414709	1	0	1	-8.40374	2.12374	384	0	0	1346.11	0	0	-0.999915	0	0	0	1	11
1941		-2.46579	1.52184	-2.89756	1.55522	0.00414931	1	0	1	-8.39959	2.11959	385	0	0	1345.38	0	0	-0.999912	0	0	0	1	11
1942		-2.48549	1.52545	-2.91726	1.55886	0.00415148	1	0	1	-8.39544	2.11544	386	0	0	1344.67	0	0	-0.999908	0	0	0	1	11
1943		-2.50524	1.52898	-2.93701	1.56243	0.00415362	1	0	1	-8.39128	2.11128	387	0	0	1343.96	0	0	-0.999904	0	0	0	1	11
1944		-2.52504	1.53244	-2.95681	1.56592	0.00415574	1	0	1	-8.38713	2.10713	388	0	0	1343.24	0	0	-0.999899	0	0	0	1	11
1945		-2.54489	1.53582	-2.97665	1.56933	0.00415785	1	0	1	-8.38297	2.10297	389	0	0	1342.52	0	0	-0.999894	0	0	0	1	11
1946		-2.56478	1.53913	-2.99655	1.57267	0.00416001	1	0	1	-8.37881	2.09881	390	0	0	1341.77	0	0	-0.999889	0	0	0	1	11
1947		-2.58472	1.54236	-3.01649	1.57593	0.00416225	1	0	1	-8.37465	2.09465	391	0	0	1341	0	0	-0.999883	0	0	0	1	11
1948		-2.60472	1.54552	-3.03648	1.57912	0.00416466	1	0	1	-8.37048	2.09048	392	0	0	1340.21	0	0	-0.999877	0	0	0	1	11
1949		-2.62475	1.54859	-3.05652	1.58222	0.00416729	1	0	1	-8.36632	2.08632	393	0	0	1339.39	0	0	-0.999871	0	0	0	1	11
1950		-2.64484	1.55159	-3.07661	1.58525	0.00417009	1	0	1	-8.36215	2.08215	394	0	0	1338.53	0	0	-0.999864	0	0	0	1	11
1951		-2.66498	1.55451	-3.09675	1.5882	0.00417296	1	0	1	-8.35797	2.07797	395	0	0	1337.65	0	0	-0.999856	0	0	0	1	11
1952		-2.68516	1.55736	-3.11693	1.59107	0.00417585	1	0	1	-8.3538	2.0738	396	0	0	1336.74	0	0	-0.999847	0	0	0	1	11
1953		-2.7054	1.56012	-3.13716	1.59386	0.00417878	1	0	1	-8.34962	2.06962	397	0	0	1335.81	0	0	-0.999838	0	0	0	1	11
1954		-2.72568	1.56281	-3.15744	1.59657	0.00418174	1	0	1	-8.34544	2.06544	398	0	0	1334.87	0	0	-0.999828	0	0	0	1	11
1955		-2.74601	1.56541	-3.17777	1.5992	0.00418473	1	0	1	-8.34125	2.06125	399	0	0	1333.92	0	0	-0.999817	0	0	0	1	11
1956		-2.76638	1.56794	-3.19815	1.60175	0.00418776	1	0	1	-8.33706	2.05706	400	0	0	1332.96	0	0	-0.999805	0	0	0	1	11
1957		-2.78681	1.57039	-3.21858	1.60422	0.00419081	1	0	1	-8.33287	2.05287	401	0	0	1332	0	0	-0.999791	0	0	0	1	11
1958		-2.80729	1.57275	-3.23905	1.60661	0.00419387	1	0	1	-8.32868	2.04868	402	0	0	1331.03	0	0	-0.999776	0	0	0	1	11
1959		-2.82781	1.57504	-3.25958	1.60891	0.00419695	1	0	1	-8.32448	2.04448	403	0	0	1330.05	0	0	-0.999759	0	0	0	1	11
1960		-2.84838	1.57724	-3.28015	1.61114	0.00420004	1	0	1	-8.32028	2.04028	404	0	0	1329.07	0	0	-0.99974	0	0	0	1	11
1961		-2.869	1.57937	-3.30077	1.61328	0.00420315	1	0	1	-8.31608	2.03608	405	0	0	1328.08	0	0	-0.999719	0	0	0	1	11
1962		-2.88967	1.58141	-3.32144	1.61534	0.00420628	1	0	1	-8.31187	2.03187	406	0	0	1327.1	0	0	-0.999695	0	0	0	1	11
1963		-2.91039	1.58336	-3.34216	1.61732	0.00420944	1	0	1	-8.30766	2.02766	407	0	0	1326.11	0	0	-0.999668	0	0	0	1	11
1964		-2.93116	1.58524	-3.36293	1.61921	0.0042126	1	0	1	-8.30345	2.02345	408	0	0	1325.11	0	0	-0.999638	0	0	0	1	11
1965		-2.95197	1.58703	-3.38374	1.62102	0.00421578	1	0	1	-8.29924	2.01924	409	0	0	1324.12	0	0	-0.999602	0	0	0	1	11
1966		-2.97284	1.58874	-3.40461	1.62274	0.00421897	1	0	1	-8.29502	2.01502	410	0	0	1323.12	0	0	-0.999561	0	0	0	1	11
1967		-2.99375	1.59037	-3.42552	1.62439	0.00422216	1	0	1	-8.29079	2.01079	411	0	0	1322.12	0	0	-0.999514	0	0	0	1	11
1968		-3.01472	1.59191	-3.44648	1.62594	0.00422535	1	0	1	-8.28657	2.00657	412	0	0	1321.13	0	0	-0.999458	0	0	0	1	11
1969		-3.03573	1.59336	-3.4675	1.62741	0.00422854	1	0	1	-8.28234	2.00234	413	0	0	1320.14	0	0	-0.999392	0	0	0	1	11
1970		-3.05679	1.59473	-3.48856	1.62879	0.00423172	1	0	1	-8.27811	1.99811	414	0	0	1319.15	0	0	-0.999314	0	0	0	1	11
1971		-3.0779	1.59602	-3.50967	1.63009	0.0042349	1	0	1	-8.27387	1.99387	415	0	0	1318.16	0	0	-0.999219	0	0	0	1	11
1972		-3.09906	1.59722	-3.53083	1.6313	0.00423806	1	0	1	-8.26964	1.98964	416	0	0	1317.19	0	0	-0.999102	0	0	0	1	11
1973		-3.12027	1.59833	-3.55204	1.63242	0.0042412	1	0	1	-8.26539	1.98539	417	0	0	1316.22	0	0	-0.998958	0	0	0	1	11
1974		-3.14153	1.59936	-3.57329	1.63346	0.00424432	1	0	1	-8.26115	1.98115	418	0	0	1315.26	0	0	-0.998776	0	0	0	1	11
1975		-3.16283	1.60029	-3.5946	1.6344	0.0042474	1	0	1	-8.2569	1.9769	419	0	0	1314.31	0	0	-0.998542	0	0	0	1	11
1976		-3.18419	1.60114	-3.61596	1.63526	0.00425045	1	0	1	-8.25265	1.97265	420	0	0	1313.37	0	0	-0.998233	0	0	0	1	11
1977		-3.2056	1.60191	-3.63736	1.63603	0.00425346	1	0	1	-8.2484	1.9684	421	0	0	1312.45	0	0	-0.997815	0	0	0	1	11
1978		-3.22705	1.60258	-3.65882	1.63671	0.00425641	1	0	1	-8.24414	1.96414	422	0	0	1311.54	0	0	-0.99723	0	0	0	1	11
1979		-3.24856	1.60316	-3.68032	1.6373	0.00425931	1	0	1	-8.23988	1.95988	423	0	0	1310.66	0	0	-0.996374	0	0	0	1	11
1980		-3.27011	1.60366	-3.70188	1.6378	0.00426215	1	0	1	-8.23562	1.95562	424	0	0	1309.8	0	0	-0.995053	0	0	0	1	11
1981		-3.29172	1.60406	-3.72348	1.63821	0.0042649	1	0	1	-8.23136	1.95136	425	0	0	1308.96	0	0	-0.992857	0	0	0	1	11
1982		-3.31337	1.60437	-3.74514	1.63852	0.00426758	1	0	1	-8.22709	1.94709	426	0	0	1308.15	0	0	-0.988809	0	0	0	1	11
1983		-3.33507	1.6046	-3.76684	1.63875	0.00427016	1	0	1	-8.22282	1.94282	427	0	0	1307.37	0	0	-0.980079	0	0	0	1	11
1984		-3.35683	1.60473	-3.78859	1.63888	0.00427264	1	0	1	-8.21855	1.93855	428	0	0	1306.62	0	0	-0.955582	0	0	0	1	11
1985		-3.37863	1.60477	-3.8104	1.63892	0.004275	1	0	1	-8.21427	1.93427	429	0	0	1305.91	0	0	-0.840407	0	0	0	1	11
1986		-3.40048	1.60471	-3.83225	1.63886	0.00427724	1	0	1	-8.20999	1.92999	430	0	0	1305.24	0	0	0.138649	0	0	0	1	11
1987		-3.42238	1.60457	-3.85415	1.63872	0.00427935	1	0	1	-8.20571	1.92571	431	0	0	1304.61	0	0	0.877504	0	0	0	1	11
1988		-3.44434	1.60433	-3.8761	1.63847	0.0042813	1	0	1	-8.20143	1.92143	432	0	0	1304.03	0	0	0.961907	0	0	0	1	11
1989		-3.46634	1.60399	-3.89811	1.63814	0.00428309	1	0	1	-8.19715	1.91715	433	0	0	1303.49	0	0	0.98205	0	0	0	1	11
1990		-3.48839	1.60356	-3.92016	1.63771	0.00428471	1	0	1	-8.19287	1.91287	434	0	0	18.2567	18.2567	1	0.989641	0	0	0	1	11
1991		-3.51049	1.60304	-3.94226	1.63718	0.00428614	1	0	1	-8.18858	1.90858	435	0	0	18.2852	18.2852	1	0.993276	0	0	0	1	11
1992		-3.53265	1.60242	-3.96441	1.63655	0.00428737	1	0	1	-8.18429	1.90429	436	0	0	18.3137	18.3137	1	0.995288	0	0	0	1	11
1993		-3.55485	1.60171	-3.98662	1.63583	0.0042884	1	0	1	-8.18	1.9	437	437	1	18.3423	18.3423	1	0.996517	0	0	0
1994		-3.5771	1.6009	-4.00887	1.63501	2.71759
1995
1996
[truncated: 23 more rows]
