# Supplementary material for: Identifying climate variables that interchange with volcanic eruptions as cooling forces during the Common Era’s ice ages
Source: Copernicus journal article supplement (doi:10.5194/egusphere-2024-1874), 2024-08-20
Supplement: Supplementary file [file egusphere-2024-1874-AC3-supplement.pdf]

## Response to referee# 2 **Identifying climate variables that interchange with volcanic eruptions as cooling forces during the Common Era's ice ages.**

### Referee # 2

The authors have made a commendable effort in this manuscript....

**Response.** Thank you for the kind assessment.

### Referee #2

However, the clarity of the manuscript should be improved.

**Response:** We agree. We will make efforts in making the text easier to read.

### Referee #2

The first line of the discussion is actually helpful but should be moved up to the introduction.

**Response:**

Agree, the sentence is moved up to the introduction.

### Referee #2

“... my primary concern lies with the tree-ring width (TRW) reconstruction, which forms the foundation of the study.”

” ... but they fail to mention that the reconstruction is based on tree-ring widths, which are known to exhibit biological memory effects (see Esper et al., 2015, among many other references). This omission is critical, as memory effects in TRW can extend the cooling signal by up to 10 years, whereas the actual volcanic forcing and cooling feedback may be much shorter in duration.”

**Response:**

Thank you. The first part of the sentence in the abstract “... little is known about when the effects of volcanism ends, and which other mechanisms prolong... ..”(line 8) and a similar sentence in the introduction (line 25), underestimate the current knowledge of the cessation of cooling from volcanic eruptions, e.g., Esper 2015 paper, page 66. **The sentences are reformulated to acknowledge the present knowledge of volcanic cooling durations.**

### Referee #2

Therefore, the paper could benefit from using Northern Hemisphere reconstructions based on maximum latewood density (MXD), such as those by Schneider et al. (2017) or

Büntgen et al. (2024), as MXD reconstructions are known to mitigate the memory effects associated with TRW.

### Response:

We use two attributes of the data, i) their positive (+) and negative (-) values defines as the values (+) above the average and the values below (-) the average and ii) their LL relations to the SAOD time series.

As shown by the referee, the NHST based on tree ring data overestimate the duration of the cooling from volcanic eruptions (Schneider et al., 2017). Unfortunately, the data are only available for the period 1001 to 2023. (There are series that are based on both MXD data and tree-ring data, Schneider et al. (2017, page 3), but here we only examine the MXD data series.) Figure 1a compares NHST time series based on the tree-ring data to those based on the MXD data.

Figure 1b shows when SAOD is leading NHST(MXD). For much of the millennium, the leading role of SAOD to NHST(MXD) is quite good. The volcanic eruptions and the decreases in temperature following the eruptions are from Tejedor et al. (2021, p. 7), but the study list only eruptions before 1835. Our LL results suggest that there should be an eruption around 1930, and it could be the Stromboli 1930 eruption, but although the 1930 eruption was strong, it show persistent eruptions over long time spans.

### Referee #2

The authors apply a loess filter to the data (what happens if you use the raw data?),

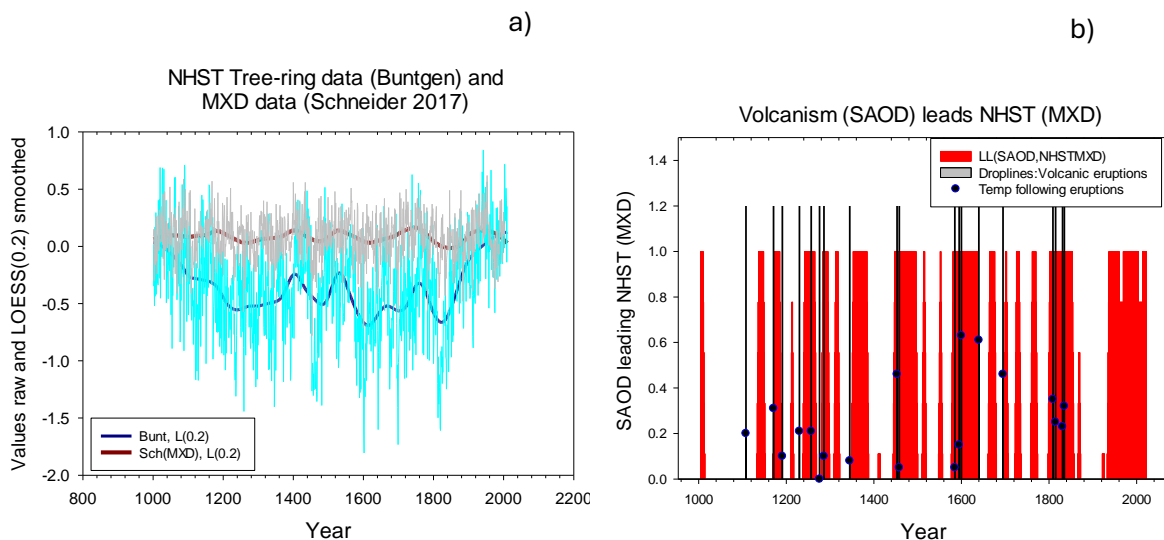

Figure 1. NHST based on tree-ring data and on MXD data. a) Comparing NHST data based on tree-ring data and on MXD data for the period 1001 to 2022. b) LL relations between SAOD and NHST (MXD). The droplines show volcanic eruptions during the last millennium up to 1835. The blue dots show the temperatures just after the eruptions or

one year later. The red columns show the periods where the effects of the eruptions as SAOD leads NHST(MXD). Data are from Tejedor et al. (2021).

Unfortunately, we do not have NHST(MXD) data for the first millennium of the Common Era. However, those data would have more uncertainty added due to decreased proxy availability, Tejedor et al. (2021, p. 11).

### Referee #2

The authors apply a loess filter to the data (what happens if you use the raw data?)

### Response

Since we study long term temperature variations, we use the LOESS (0,2) smoothed data. Using raw data, the picture would be as in Figure 2.

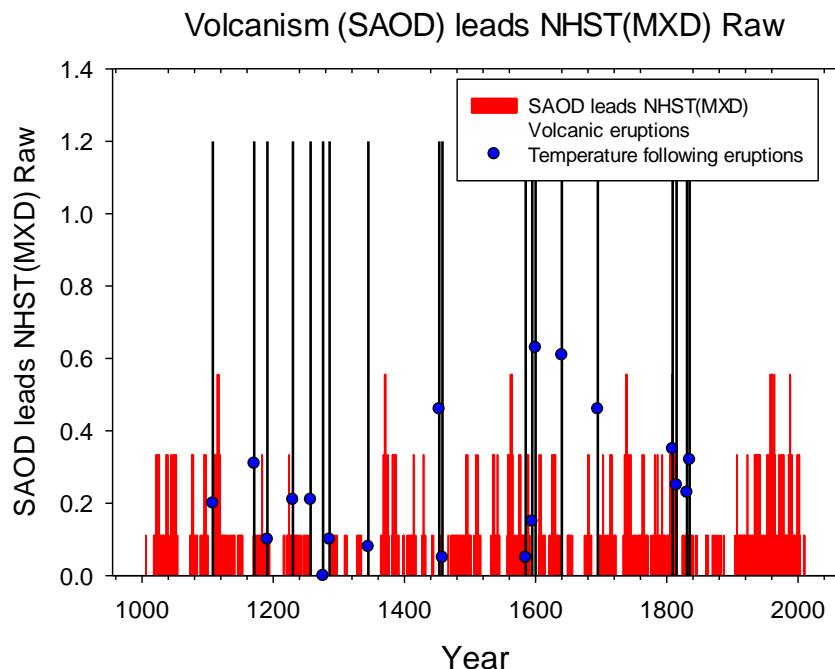

Figure 2. Same as in Figure 1, but with the raw NHST(MXD) data.

Most of the data are contaminated with noise and only a few are significant with  $LL > 0.32$ .

### Referee #2

In Figure 3, if you include the titles (which i dont know if its allowed), you should also point out which are your NHST raw temperature and which are the PCAs.

### Response

Thank you. We forgot to give a text for panel e) The panel shows the PCA is applied to the LOESS(0.05) smoothed values.

## References

Schneider, L., Smerdon, J. E., Pretis, F., Hartl-Meier, C., & Esper, J. (2017). A new archive of large volcanic events over the past millennium derived from reconstructed summer temperatures (vol 12, 094005, 2017). *Environmental Research Letters*, 12(11). <https://doi.org/ARTN 119501>

10.1088/1748-9326/aa9426

Tejedor, E., Steiger, N., Smerdon, J. E., Serrano-Notivoli, R., & Vuille, M. (2021). Global Temperature Responses to Large Tropical Volcanic Eruptions in Paleo Data Assimilation Products and Climate Model Simulations Over the Last Millennium. *Paleoceanography and Paleoclimatology*, 36(4). <https://doi.org/ARTN e2020PA004128>

10.1029/2020PA004128
